# Supplementary material for: Remarkable Synergy When Combining EZH2 Inhibitors with YM155 Is H3K27me3-Independent
Source: MDPI journal article supplement (doi:10.3390/cancers15010208), 2022-12-29
Supplement: s1 [file s1]

Figure 1F

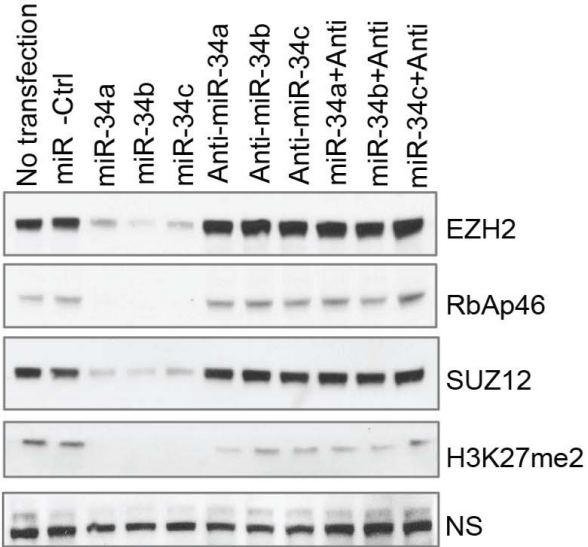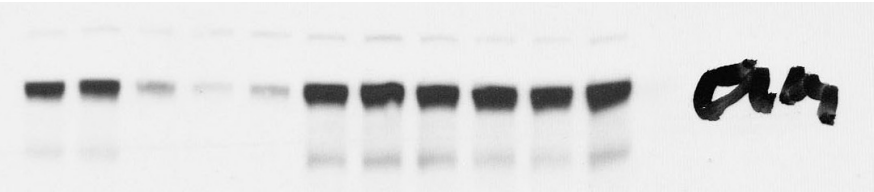

EZH2

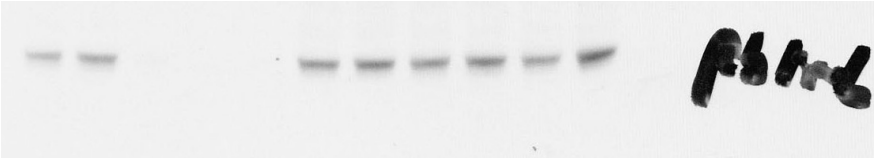

RbAp46

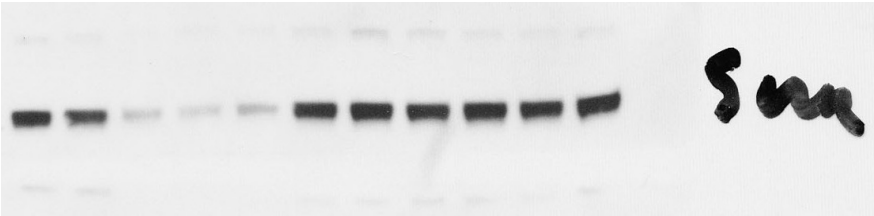

SUZ12

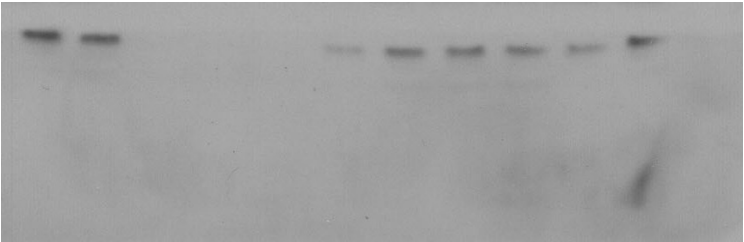

H3K27me2

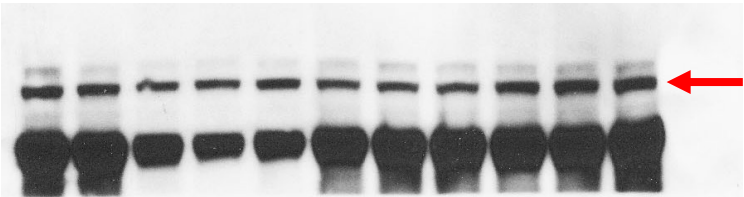

Non-specific band

Figure 3A

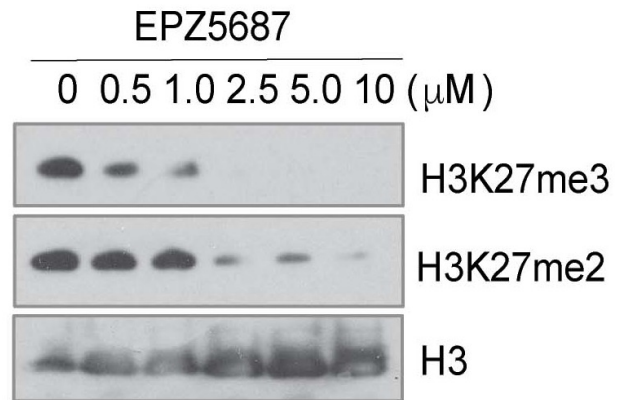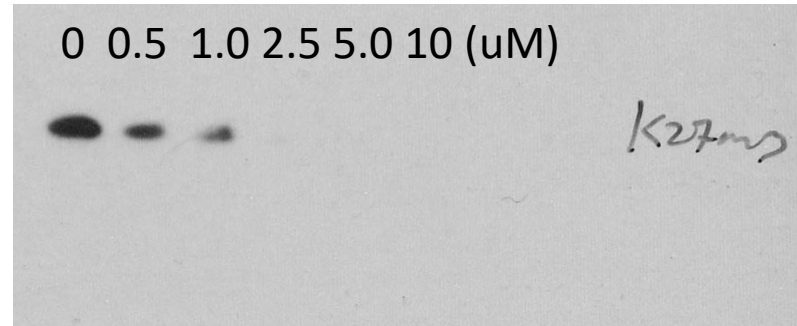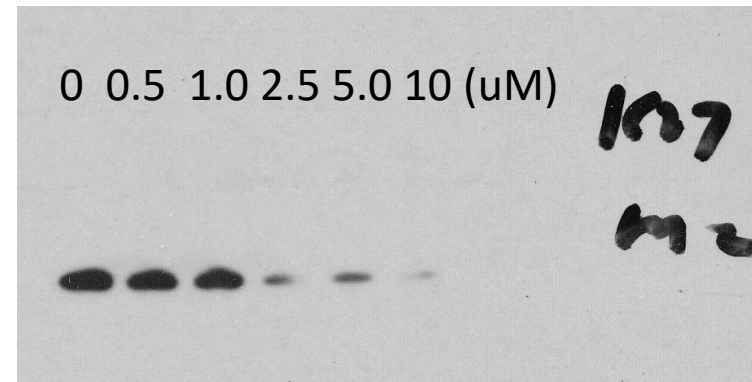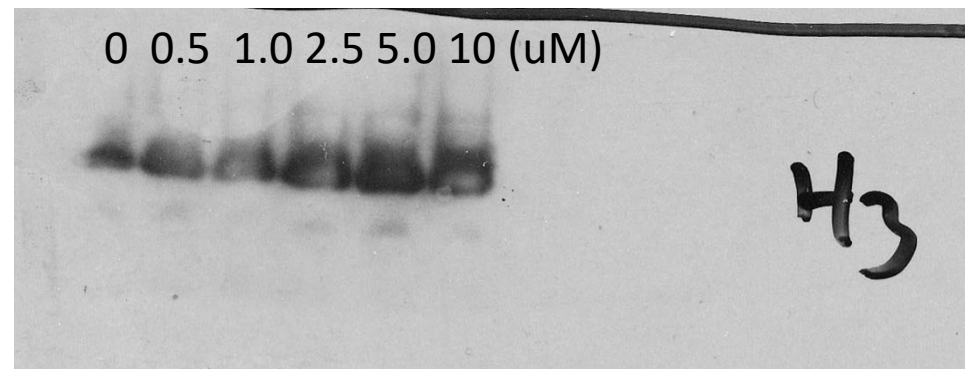

Figure 3B

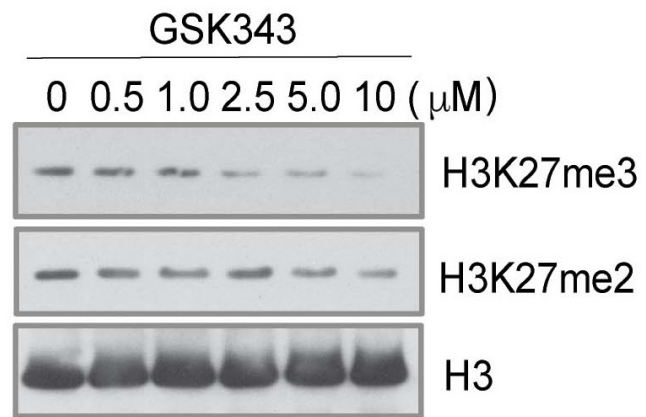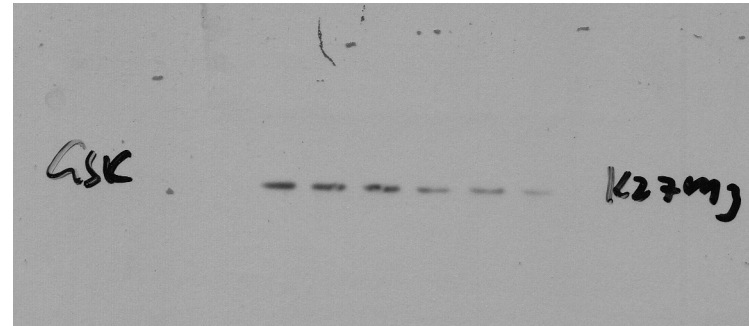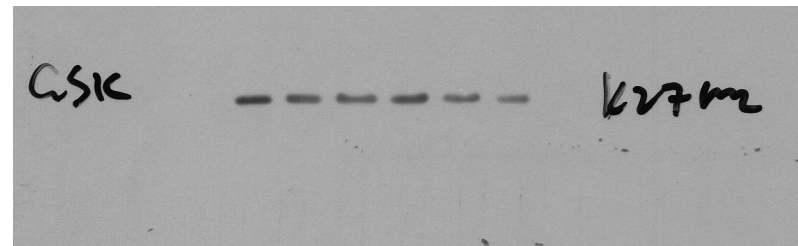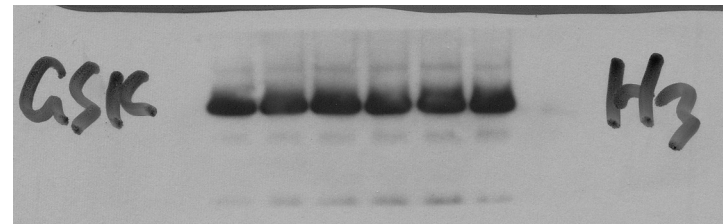

Figure 3C

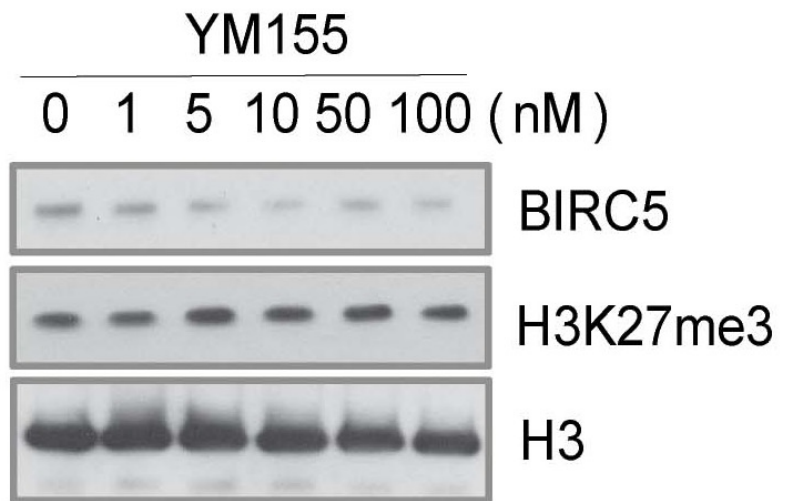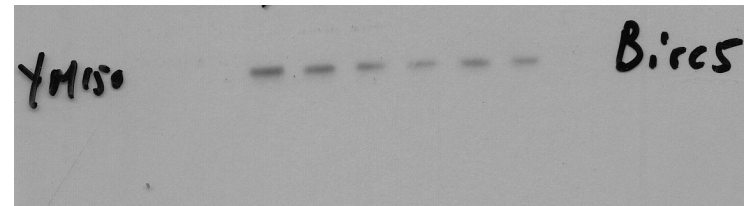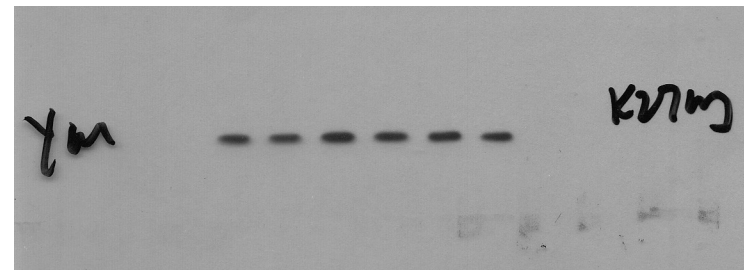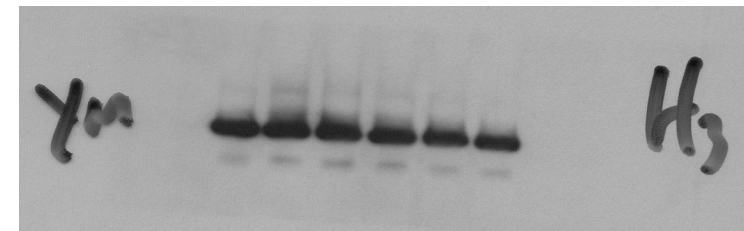

Figure 3E

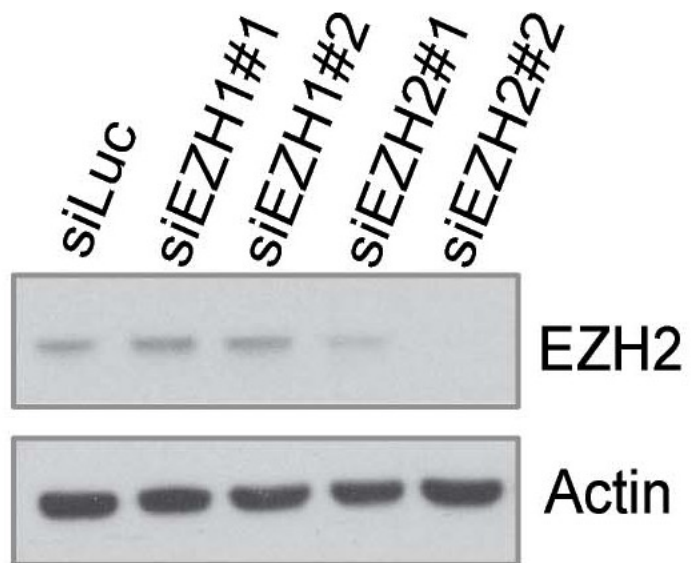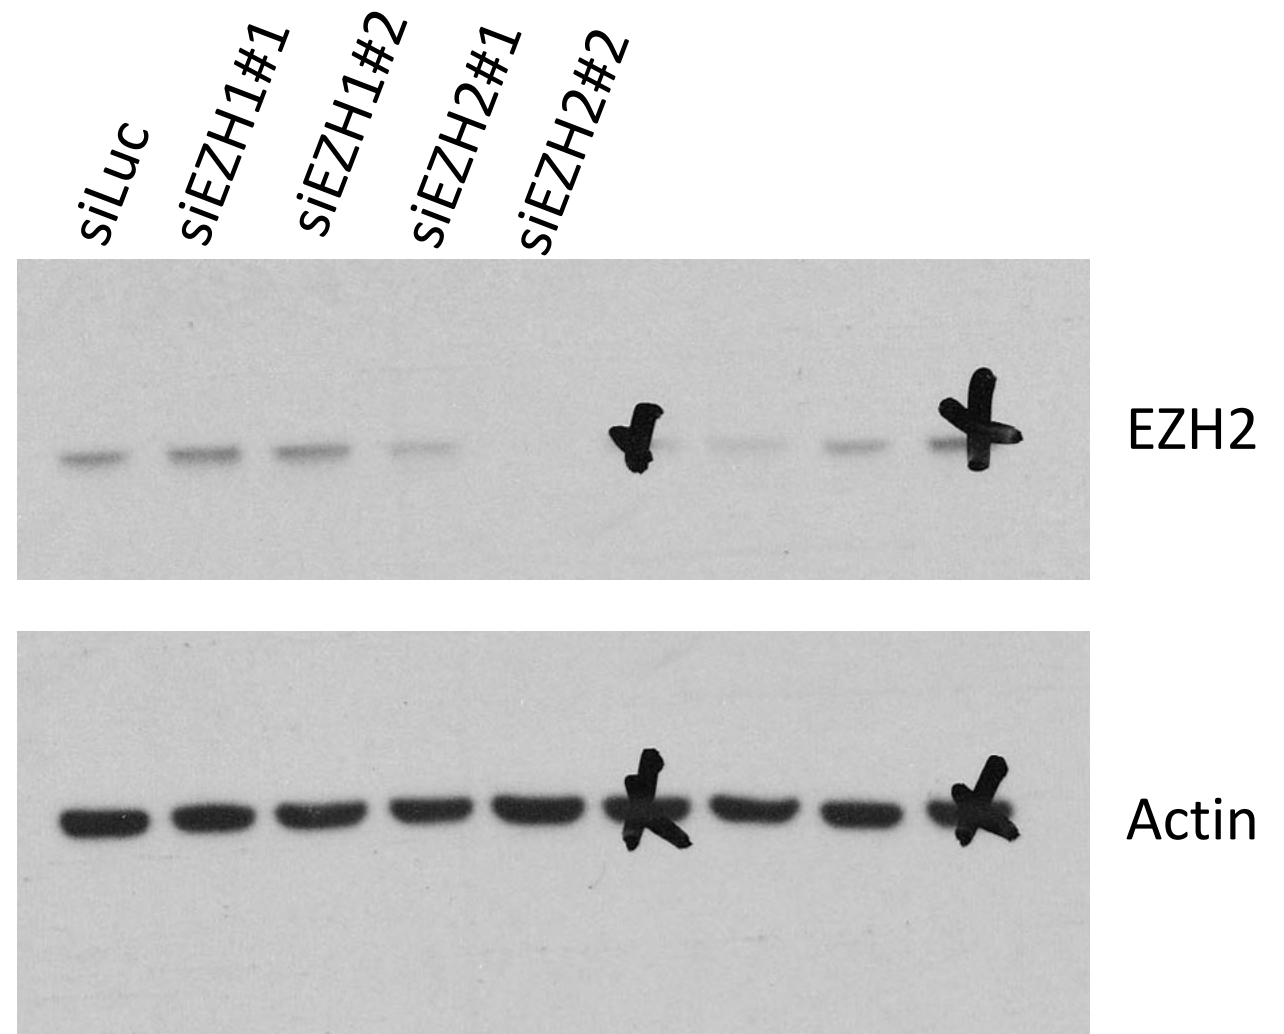



Figure 3F

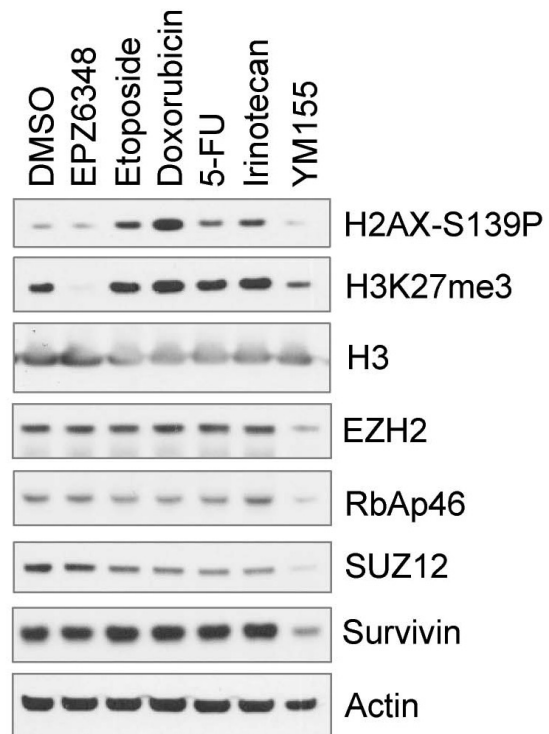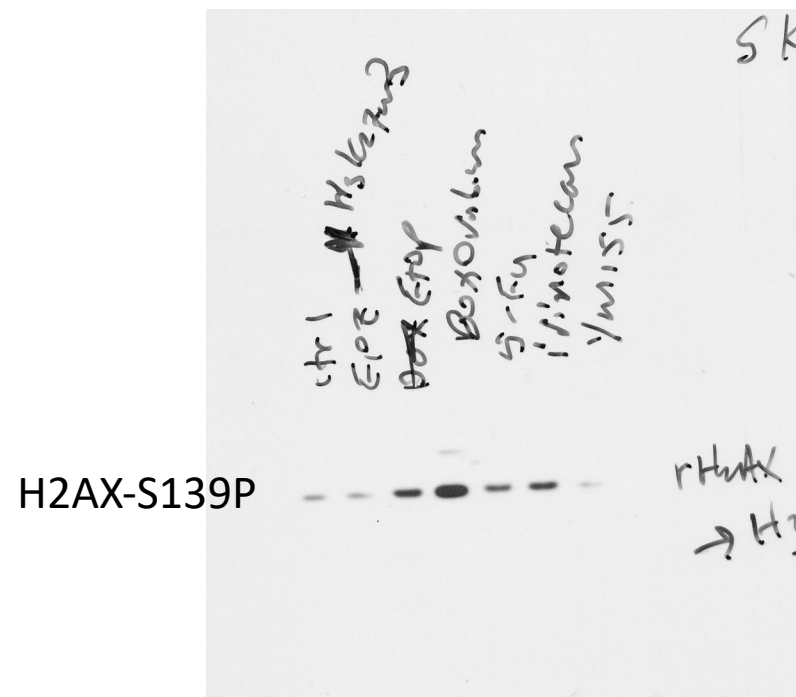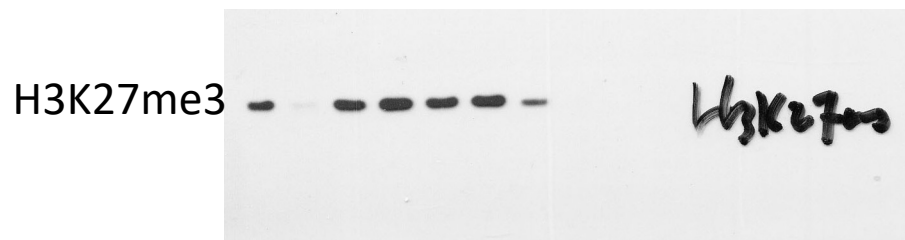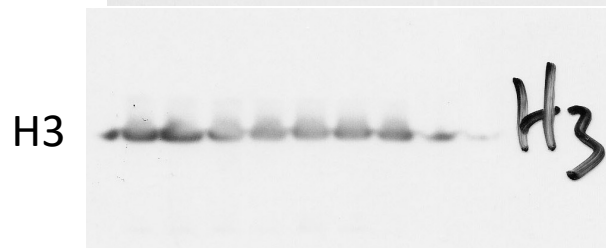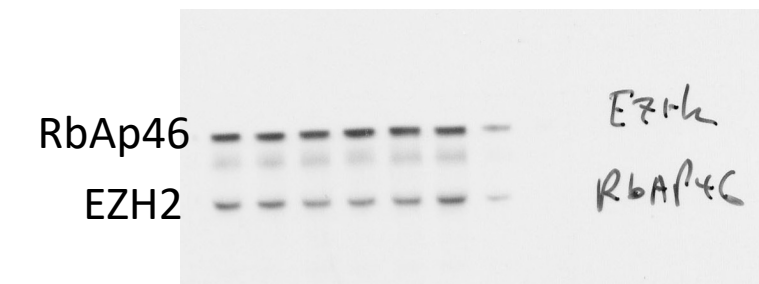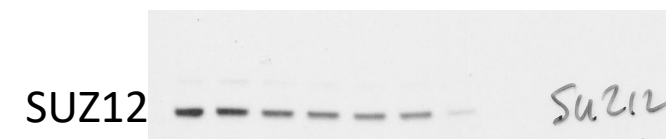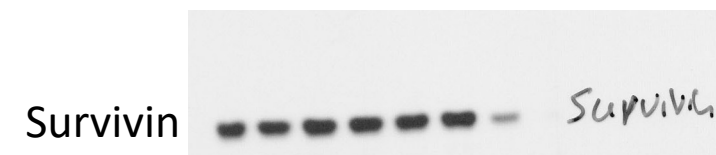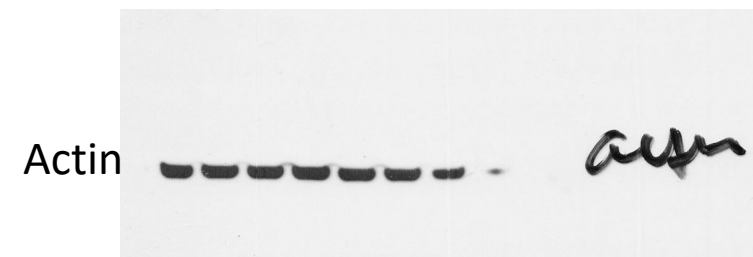

Figure 4A

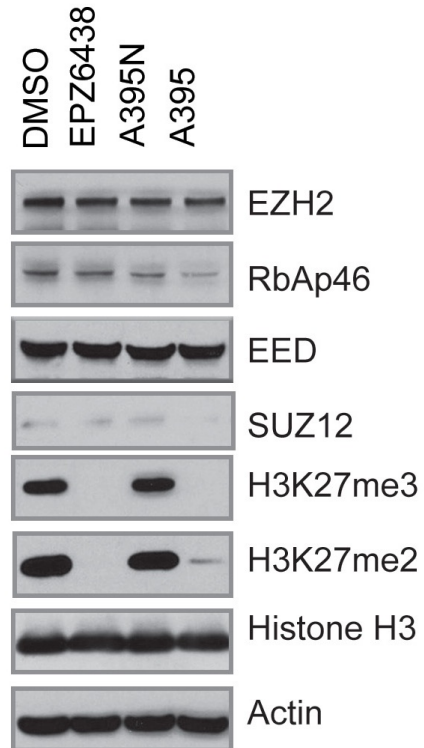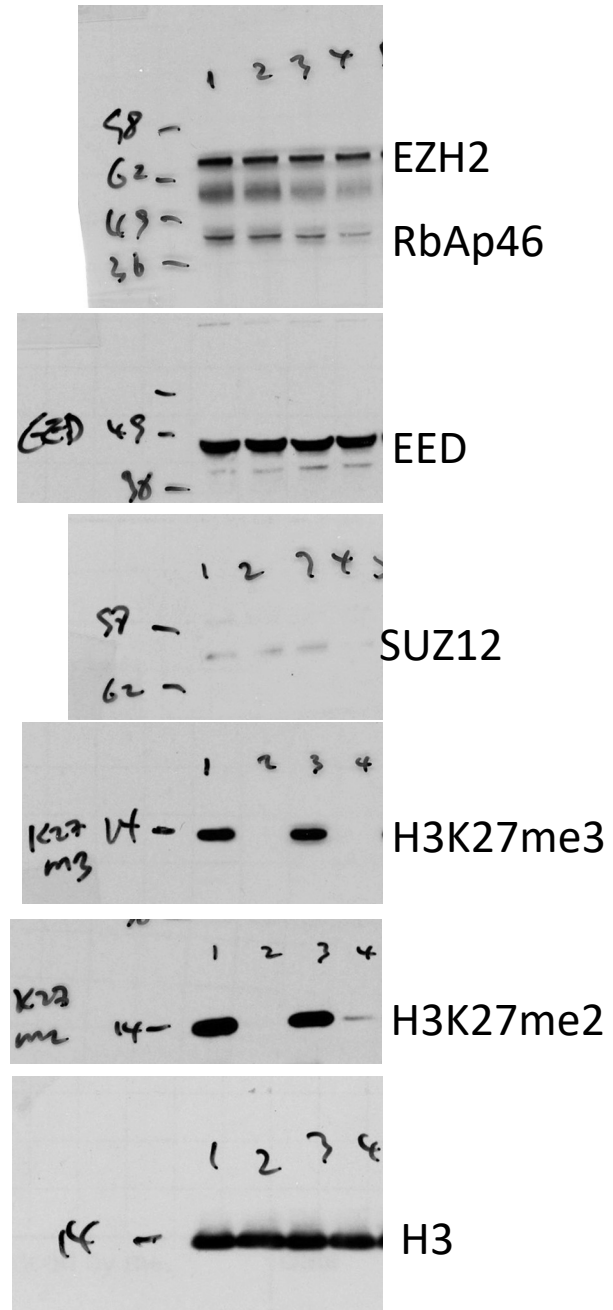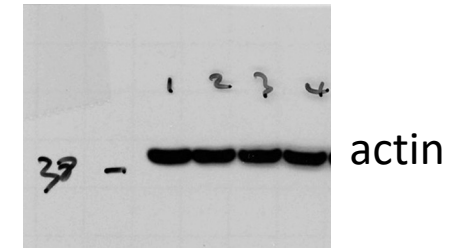

Figure 4D

SAOS2 U2OS 143B

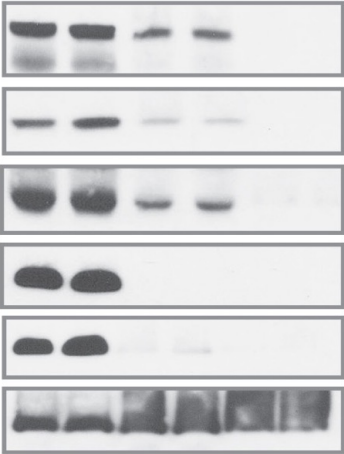

EZH2

SUZ12

RbAp46

H3K27me3

H3K27me2

Histone H3

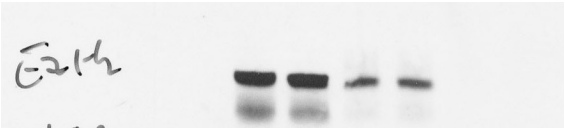

EZH2

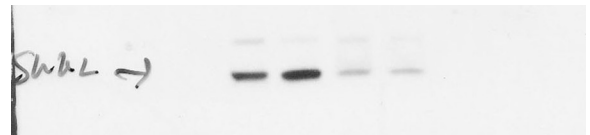

SUZ12

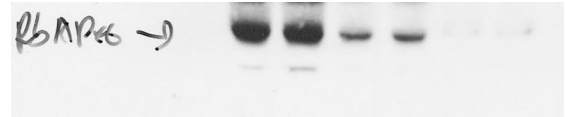

RbAp46

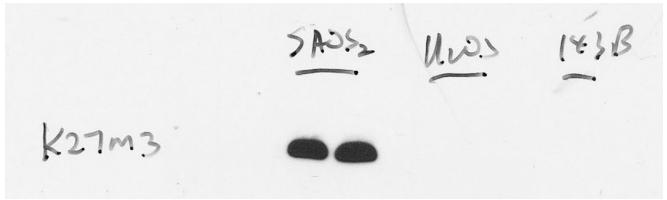

H3K27me3

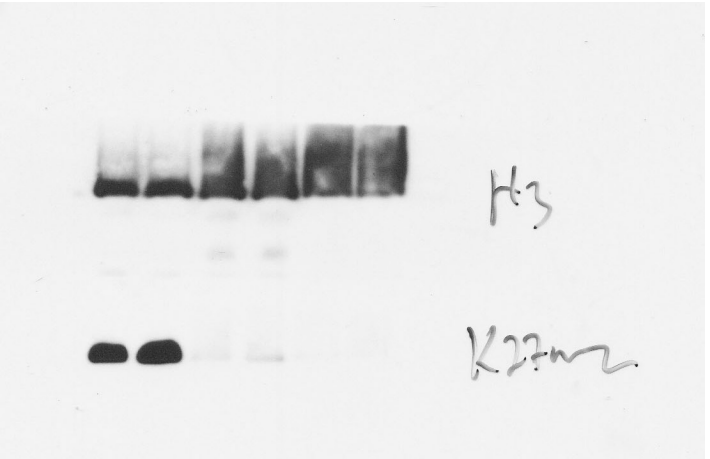

Histone H3

H3K27me2
