# Supplementary material for: Remarkable Synergy When Combining EZH2 Inhibitors with YM155 Is H3K27me3-Independent
Source: Cancers (Basel). 2022 Dec 29;15(1):208. doi: 10.3390/cancers15010208 (PMC9818370; doi:10.3390/cancers15010208)
Supplement: Supplementary file 1 [file cancers-15-00208-s001.zip]

Archive with 5 entries (5 files):
- cancers-1945850-SI.pdf
- cancers-1945850-supplementary.pdf
- Table S1.Genes downregulated and upregulated by miR-34.xlsx
- Table S2. Common genes by miR34s.xlsx
- Table S3.27 Gene annotation .xlsx
