# Supplementary material for: Remarkable Synergy When Combining EZH2 Inhibitors with YM155 Is H3K27me3-Independent
Source: Cancers (Basel). 2022 Dec 29;15(1):208. doi: 10.3390/cancers15010208 (PMC9818370; doi:10.3390/cancers15010208)
Supplement: Supplementary file 1 [file cancers-15-00208-s001.zip › Table S1.Genes downregulated and upregulated by miR-34.xlsx]

## Sheet: Down by miR-34a
original id	description
SEPT10	septin 10
ACE	angiotensin I converting enzyme (peptidyl-dipeptidase A) 1
ACSL4	acyl-CoA synthetase long-chain family member 4
ADAMTS2	ADAM metallopeptidase with thrombospondin type 1 motif, 2
ADD2	adducin 2 (beta)
ADI1	acireductone dioxygenase 1
ADK	adenosine kinase
AIP	aryl hydrocarbon receptor interacting protein
AK2	adenylate kinase 2
AK4
AKT2	v-akt murine thymoma viral oncogene homolog 2
ANGPTL2	angiopoietin-like 2
ANKRD10	ankyrin repeat domain 10
ANKRD43	ankyrin repeat domain 43
ANKS6	ankyrin repeat and sterile alpha motif domain containing 6
ANLN	anillin, actin binding protein
ANO4
ANXA5	annexin A5
AOX1	aldehyde oxidase 1
AP2S1	adaptor-related protein complex 2, sigma 1 subunit
APOLD1	apolipoprotein L domain containing 1
APPL1
AQP10	aquaporin 10
ARAF	v-raf murine sarcoma 3611 viral oncogene homolog
ARAP2
ARG2	arginase, type II
ARGLU1
ARHGAP1	Rho GTPase activating protein 1
ARHGAP11A	Rho GTPase activating protein 11A
ARHGAP19	Rho GTPase activating protein 19
ARHGAP42
ARHGAP6	Rho GTPase activating protein 6
ARIH2	ariadne homolog 2 (Drosophila)
ARL4A	ADP-ribosylation factor-like 4A
ARL6IP6	ADP-ribosylation-like factor 6 interacting protein 6
ARSB	arylsulfatase B
AS3MT	arsenic (+3 oxidation state) methyltransferase
ASAP1
ASCL1	achaete-scute complex-like 1 (Drosophila)
ASF1B	ASF1 anti-silencing function 1 homolog B (S. cerevisiae)
ASPM	asp (abnormal spindle) homolog, microcephaly associated (Drosophila)
ATAD2	ATPase family, AAA domain containing 2
ATAD5
ATL3
ATPAF1	ATP synthase mitochondrial F1 complex assembly factor 1
ATPIF1	ATPase inhibitory factor 1
AURKA	aurora kinase A
AURKB	aurora kinase B
B3GALTL	beta 1,3-galactosyltransferase-like
B4GALT1	UDP-Gal:betaGlcNAc beta 1,4- galactosyltransferase, polypeptide 1
BARD1	BRCA1 associated RING domain 1
BCL2L12	BCL2-like 12 (proline rich)
BIRC5	baculoviral IAP repeat-containing 5 (survivin)
BLM	Bloom syndrome
BMP7	bone morphogenetic protein 7 (osteogenic protein 1)
BRCA1	breast cancer 1, early onset
BRCA2	breast cancer 2, early onset
BRIP1	BRCA1 interacting protein C-terminal helicase 1
BUB1	BUB1 budding uninhibited by benzimidazoles 1 homolog (yeast)
BUB1B	BUB1 budding uninhibited by benzimidazoles 1 homolog beta (yeast)
C10ORF78	chromosome 10 open reading frame 78
C10ORF84	chromosome 10 open reading frame 84
C11ORF82
C12ORF32	chromosome 12 open reading frame 32
C12ORF48	chromosome 12 open reading frame 48
C13ORF34	chromosome 13 open reading frame 34
C14ORF106	chromosome 14 open reading frame 106
C15ORF42	chromosome 15 open reading frame 42
C16ORF5	chromosome 16 open reading frame 5
C16ORF75	chromosome 16 open reading frame 75
C18ORF54	chromosome 18 open reading frame 54
C18ORF56	chromosome 18 open reading frame 56
C19ORF48	chromosome 19 open reading frame 48
C1ORF104	chromosome 1 open reading frame 104
C1ORF112	chromosome 1 open reading frame 112
C1ORF135	chromosome 1 open reading frame 135
C1ORF144	chromosome 1 open reading frame 144
C1ORF61	chromosome 1 open reading frame 61
C20ORF117	chromosome 20 open reading frame 117
C20ORF72	chromosome 20 open reading frame 72
C21ORF58	chromosome 21 open reading frame 58
C2CD2
C3ORF58	chromosome 3 open reading frame 58
C4ORF21	chromosome 4 open reading frame 21
C5ORF22	chromosome 5 open reading frame 22
C5ORF34
C5ORF39
C6ORF115	chromosome 6 open reading frame 115
C6ORF125	chromosome 6 open reading frame 125
C6ORF147	chromosome 6 open reading frame 147
C8ORF76	chromosome 8 open reading frame 76
C9ORF100	chromosome 9 open reading frame 100
CABLES2	Cdk5 and Abl enzyme substrate 2
CALCB	calcitonin-related polypeptide, beta
CALCOCO2	calcium binding and coiled-coil domain 2
CALML4	calmodulin-like 4
CAPN1	calpain 1, (mu/I) large subunit
CASC5	cancer susceptibility candidate 5
CASP2	caspase 2, apoptosis-related cysteine peptidase (neural precursor cell expressed, developmentally down-regulated 2)
CASP8AP2	CASP8 associated protein 2
CBLN1	cerebellin 1 precursor
CBX2	chromobox homolog 2 (Pc class homolog, Drosophila)
CBX5	chromobox homolog 5 (HP1 alpha homolog, Drosophila)
CCBL1	cysteine conjugate-beta lyase; cytoplasmic (glutamine transaminase K, kyneurenine aminotransferase)
CCDC150
CCDC18	coiled-coil domain containing 18
CCDC3	coiled-coil domain containing 3
CCDC50	coiled-coil domain containing 50
CCNA2	cyclin A2
CCNB1	cyclin B1
CCNB2	cyclin B2
CCNE2	cyclin E2
CCNF	cyclin F
CCNG1	cyclin G1
CD200	CD200 molecule
CD99	CD99 molecule
CDC20	CDC20 cell division cycle 20 homolog (S. cerevisiae)
CDC23	CDC23 (cell division cycle 23, yeast, homolog)
CDC25A	cell division cycle 25A
CDC25B	cell division cycle 25B
CDC25C	cell division cycle 25C
CDC45
CDC6	CDC6 cell division cycle 6 homolog (S. cerevisiae)
CDC7	CDC7 cell division cycle 7 (S. cerevisiae)
CDCA2	cell division cycle associated 2
CDCA3	cell division cycle associated 3
CDCA4	cell division cycle associated 4
CDCA5	cell division cycle associated 5
CDCA7	cell division cycle associated 7
CDCA7L	cell division cycle associated 7-like
CDCA8	cell division cycle associated 8
CDH11	cadherin 11, type 2, OB-cadherin (osteoblast)
CDK1
CDK2	cyclin-dependent kinase 2
CDK4	cyclin-dependent kinase 4
CDKN3	cyclin-dependent kinase inhibitor 3 (CDK2-associated dual specificity phosphatase)
CDT1	chromatin licensing and DNA replication factor 1
CENPA	centromere protein A
CENPE	centromere protein E, 312kDa
CENPF	centromere protein F, 350/400ka (mitosin)
CENPH	centromere protein H
CENPI	centromere protein I
CENPJ	centromere protein J
CENPK	centromere protein K
CENPL	centromere protein L
CENPM	centromere protein M
CENPN	centromere protein N
CENPO	centromere protein O
CENPW
CEP152	centrosomal protein 152kDa
CEP55	centrosomal protein 55kDa
CEP70	centrosomal protein 70kDa
CHAF1A	chromatin assembly factor 1, subunit A (p150)
CHAF1B	chromatin assembly factor 1, subunit B (p60)
CHEK1	CHK1 checkpoint homolog (S. pombe)
CHEK2	CHK2 checkpoint homolog (S. pombe)
CHRAC1	chromatin accessibility complex 1
CIT	citron (rho-interacting, serine/threonine kinase 21)
CKAP2L	cytoskeleton associated protein 2-like
CKLF	chemokine-like factor
CKS1B	CDC28 protein kinase regulatory subunit 1B
CLN6	ceroid-lipofuscinosis, neuronal 6, late infantile, variant
CLSPN	claspin homolog (Xenopus laevis)
CNPY3
CNTNAP2	contactin associated protein-like 2
COL4A2	collagen, type IV, alpha 2
CPSF6	cleavage and polyadenylation specific factor 6, 68kDa
CRIP2	cysteine-rich protein 2
CTDSPL	CTD (carboxy-terminal domain, RNA polymerase II, polypeptide A) small phosphatase-like
CTSC	cathepsin C
CTSL2	cathepsin L2
CXCL12	chemokine (C-X-C motif) ligand 12 (stromal cell-derived factor 1)
CXCR7	chemokine (C-X-C motif) receptor 7
CYB5B	cytochrome b5 type B (outer mitochondrial membrane)
CYP2R1	cytochrome P450, family 2, subfamily R, polypeptide 1
DARS2	aspartyl-tRNA synthetase 2 (mitochondrial)
DBF4B	DBF4 homolog B (S. cerevisiae)
DCLRE1A	DNA cross-link repair 1A (PSO2 homolog, S. cerevisiae)
DCLRE1B	DNA cross-link repair 1B (PSO2 homolog, S. cerevisiae)
DDX11	DEAD/H (Asp-Glu-Ala-Asp/His) box polypeptide 11 (CHL1-like helicase homolog, S. cerevisiae)
DDX46	DEAD (Asp-Glu-Ala-Asp) box polypeptide 46
DEPDC1	DEP domain containing 1
DEPDC1B	DEP domain containing 1B
DEPDC7	DEP domain containing 7
DGCR14	DiGeorge syndrome critical region gene 14
DHFR	dihydrofolate reductase
DHRS13	dehydrogenase/reductase (SDR family) member 13
DHX37	DEAH (Asp-Glu-Ala-His) box polypeptide 37
DIAPH1	diaphanous homolog 1 (Drosophila)
DIAPH3	diaphanous homolog 3 (Drosophila)
DKFZP434L187	-
DLEU1	deleted in lymphocytic leukemia, 1
DLEU2	deleted in lymphocytic leukemia, 2
DLGAP5
DNA2
DNAJC10	DnaJ (Hsp40) homolog, subfamily C, member 10
DNAJC21
DNAJC24
DONSON	downstream neighbor of SON
DPF1	D4, zinc and double PHD fingers family 1
DSCC1
DSN1
DTL	denticleless homolog (Drosophila)
DTWD1	DTW domain containing 1
DTYMK	deoxythymidylate kinase (thymidylate kinase)
DUT	dUTP pyrophosphatase
E2F1	E2F transcription factor 1
E2F2	E2F transcription factor 2
E2F5	E2F transcription factor 5, p130-binding
E2F7	E2F transcription factor 7
E2F8	E2F transcription factor 8
EAF2	ELL associated factor 2
ECE2	endothelin converting enzyme 2
ECT2	epithelial cell transforming sequence 2 oncogene
EED	embryonic ectoderm development
EFNA5	ephrin-A5
EIF2S2	eukaryotic translation initiation factor 2, subunit 2 beta, 38kDa
EIF3B
EIF3M
ELAVL1	ELAV (embryonic lethal, abnormal vision, Drosophila)-like 1 (Hu antigen R)
EME1	essential meiotic endonuclease 1 homolog 1 (S. pombe)
EMP2	epithelial membrane protein 2
ENOSF1	enolase superfamily member 1
EPAS1	endothelial PAS domain protein 1
EPR1	effector cell peptidase receptor 1
ERCC1	excision repair cross-complementing rodent repair deficiency, complementation group 1 (includes overlapping antisense sequence)
ERCC6L
ERI1
ERLIN1
ESCO2	establishment of cohesion 1 homolog 2 (S. cerevisiae)
ESPL1	extra spindle poles like 1 (S. cerevisiae)
ETS1	v-ets erythroblastosis virus E26 oncogene homolog 1 (avian)
EXO1	exonuclease 1
EZH2	enhancer of zeste homolog 2 (Drosophila)
FAM111B	family with sequence similarity 111, member B
FAM122B	family with sequence similarity 122B
FAM124A	family with sequence similarity 124A
FAM126A	family with sequence similarity 126, member A
FAM127A
FAM167A
FAM54A	family with sequence similarity 54, member A
FAM64A	family with sequence similarity 64, member A
FAM69A	family with sequence similarity 69, member A
FAM70A	family with sequence similarity 70, member A
FAM76A	family with sequence similarity 76, member A
FAM83D	family with sequence similarity 83, member D
FANCA	Fanconi anemia, complementation group A
FANCC	Fanconi anemia, complementation group C
FANCD2	Fanconi anemia, complementation group D2
FANCE	Fanconi anemia, complementation group E
FANCG	Fanconi anemia, complementation group G
FANCI	Fanconi anemia, complementation group I
FBLN1	fibulin 1
FBRSL1
FBXL7	F-box and leucine-rich repeat protein 7
FBXO5	F-box protein 5
FEN1	flap structure-specific endonuclease 1
FGFR1	fibroblast growth factor receptor 1 (fms-related tyrosine kinase 2, Pfeiffer syndrome)
FHL2	four and a half LIM domains 2
FKBP1A	FK506 binding protein 1A, 12kDa
FLJ45482	-
FOXJ2	forkhead box J2
FOXM1	forkhead box M1
FOXN2	forkhead box N2
FOXN3
FSTL1	follistatin-like 1
FUS	fusion (involved in t(12;16) in malignant liposarcoma)
FUT4	fucosyltransferase 4 (alpha (1,3) fucosyltransferase, myeloid-specific)
FUT9	fucosyltransferase 9 (alpha (1,3) fucosyltransferase)
FZD1	frizzled homolog 1 (Drosophila)
G2E3
G3BP1
GABRB1	gamma-aminobutyric acid (GABA) A receptor, beta 1
GABRQ	gamma-aminobutyric acid (GABA) receptor, theta
GALM	galactose mutarotase (aldose 1-epimerase)
GALNT7	UDP-N-acetyl-alpha-D-galactosamine:polypeptide N-acetylgalactosaminyltransferase 7 (GalNAc-T7)
GALNTL1	UDP-N-acetyl-alpha-D-galactosamine:polypeptide N-acetylgalactosaminyltransferase-like 1
GAS1	growth arrest-specific 1
GAS2L3	growth arrest-specific 2 like 3
GAS5	growth arrest-specific 5
GEMIN5	gem (nuclear organelle) associated protein 5
GFRA3	GDNF family receptor alpha 3
GGH	gamma-glutamyl hydrolase (conjugase, folylpolygammaglutamyl hydrolase)
GINS1	GINS complex subunit 1 (Psf1 homolog)
GINS2	GINS complex subunit 2 (Psf2 homolog)
GINS3	GINS complex subunit 3 (Psf3 homolog)
GINS4	GINS complex subunit 4 (Sld5 homolog)
GLT8D1	glycosyltransferase 8 domain containing 1
GMNN	geminin, DNA replication inhibitor
GNAS-AS
GNPDA1	glucosamine-6-phosphate deaminase 1
GORASP2	golgi reassembly stacking protein 2, 55kDa
GPC6	glypican 6
GPR107	G protein-coupled receptor 107
GPSM2	G-protein signalling modulator 2 (AGS3-like, C. elegans)
GRIK3	glutamate receptor, ionotropic, kainate 3
GRN	granulin
GSG2	germ cell associated 2 (haspin)
GSPT1	G1 to S phase transition 1
GTF3C2	general transcription factor IIIC, polypeptide 2, beta 110kDa
GTF3C3	general transcription factor IIIC, polypeptide 3, 102kDa
GTSE1	G-2 and S-phase expressed 1
GUCY1B3	guanylate cyclase 1, soluble, beta 3
GUSB	glucuronidase, beta
GUSBP3
GXYLT1
H2AFV	H2A histone family, member V
H2AFX	H2A histone family, member X
HACE1	HECT domain and ankyrin repeat containing, E3 ubiquitin protein ligase 1
HADH	hydroxyacyl-Coenzyme A dehydrogenase
HAT1	histone acetyltransferase 1
HAUS1
HAUS4
HCN3	hyperpolarization activated cyclic nucleotide-gated potassium channel 3
HDAC1	histone deacetylase 1
HEBP1	heme binding protein 1
HECTD2	HECT domain containing 2
HELLS	helicase, lymphoid-specific
HES1	hairy and enhancer of split 1, (Drosophila)
HGF	hepatocyte growth factor (hepapoietin A; scatter factor)
HHEX	homeobox, hematopoietically expressed
HINT1	histidine triad nucleotide binding protein 1
HIP1	huntingtin interacting protein 1
HIRIP3	HIRA interacting protein 3
HJURP
HMGB1	high-mobility group box 1
HMGN4	high mobility group nucleosomal binding domain 4
HMGN5
HMMR	hyaluronan-mediated motility receptor (RHAMM)
HN1	hematological and neurological expressed 1
HOOK1	hook homolog 1 (Drosophila)
HP1BP3	heterochromatin protein 1, binding protein 3
HPDL
HPS3	Hermansky-Pudlak syndrome 3
HRASLS	HRAS-like suppressor
HSD17B6	hydroxysteroid (17-beta) dehydrogenase 6
HSPA2	heat shock 70kDa protein 2
HSPD1	heat shock 60kDa protein 1 (chaperonin)
IFRD2	interferon-related developmental regulator 2
IGDCC3
IGFBP4	insulin-like growth factor binding protein 4
IKBKB	inhibitor of kappa light polypeptide gene enhancer in B-cells, kinase beta
IL2RB	interleukin 2 receptor, beta
IMPDH1	IMP (inosine monophosphate) dehydrogenase 1
INCENP	inner centromere protein antigens 135/155kDa
ING3	inhibitor of growth family, member 3
IQGAP3	IQ motif containing GTPase activating protein 3
IRX3	iroquois homeobox protein 3
ISY1
ITGB3BP	integrin beta 3 binding protein (beta3-endonexin)
KANK2
KCNK3	potassium channel, subfamily K, member 3
KCNQ5	potassium voltage-gated channel, KQT-like subfamily, member 5
KCTD12	potassium channel tetramerisation domain containing 12
KIAA0101	KIAA0101
KIAA1274	KIAA1274
KIAA1524	KIAA1524
KIAA1704	KIAA1704
KIAA1984	KIAA1984
KIF11	kinesin family member 11
KIF14	kinesin family member 14
KIF15	kinesin family member 15
KIF18A	kinesin family member 18A
KIF18B
KIF20A	kinesin family member 20A
KIF20B
KIF22	kinesin family member 22
KIF23	kinesin family member 23
KIF2C	kinesin family member 2C
KIF4A	kinesin family member 4A
KIFC1	kinesin family member C1
KITLG	KIT ligand
KLF15	Kruppel-like factor 15
KNTC1	kinetochore associated 1
LAPTM4B	lysosomal associated protein transmembrane 4 beta
LDB3	LIM domain binding 3
LDHA	lactate dehydrogenase A
LEF1	lymphoid enhancer-binding factor 1
LFNG	lunatic fringe homolog (Drosophila)
LIG1	ligase I, DNA, ATP-dependent
LIX1	Lix1 homolog (mouse)
LLPH
LMAN2L	lectin, mannose-binding 2-like
LMO3	LIM domain only 3 (rhombotin-like 2)
LNP1	leukemia NUP98 fusion partner 1
LOC100127983
LOC100128191
LOC100190986
LOC100288693
LOC100506638
LOC100506761
LOC100507057
LOC100507773
LOC202781	-
LOC283481	-
LOC346887	-
LOC440288	-
LOC440434	-
LOC641518	-
LOC644538	-
LOC645561	-
LOC646762	-
LRP3	low density lipoprotein receptor-related protein 3
LRPPRC	leucine-rich PPR-motif containing
LSM2	LSM2 homolog, U6 small nuclear RNA associated (S. cerevisiae)
MAD2L1	MAD2 mitotic arrest deficient-like 1 (yeast)
MAD2L2	MAD2 mitotic arrest deficient-like 2 (yeast)
MAGT1
MAPK1IP1L
MASTL	microtubule associated serine/threonine kinase-like
MATR3	matrin 3
MCM10	MCM10 minichromosome maintenance deficient 10 (S. cerevisiae)
MCM2	MCM2 minichromosome maintenance deficient 2, mitotin (S. cerevisiae)
MCM3	MCM3 minichromosome maintenance deficient 3 (S. cerevisiae)
MCM4	MCM4 minichromosome maintenance deficient 4 (S. cerevisiae)
MCM5	MCM5 minichromosome maintenance deficient 5, cell division cycle 46 (S. cerevisiae)
MCM6	MCM6 minichromosome maintenance deficient 6 (MIS5 homolog, S. pombe) (S. cerevisiae)
MED22
MED8	mediator of RNA polymerase II transcription, subunit 8 homolog (S. cerevisiae)
MELK	maternal embryonic leucine zipper kinase
METAP1	methionyl aminopeptidase 1
METTL10
MFHAS1	malignant fibrous histiocytoma amplified sequence 1
MGC16121	-
MGC45800	-
MIR17HG
MIRLET7D
MKI67	antigen identified by monoclonal antibody Ki-67
MLF1IP	MLF1 interacting protein
MMD	monocyte to macrophage differentiation-associated
MMP16	matrix metallopeptidase 16 (membrane-inserted)
MND1	meiotic nuclear divisions 1 homolog (S. cerevisiae)
MPHOSPH6	M-phase phosphoprotein 6
MRE11A	MRE11 meiotic recombination 11 homolog A (S. cerevisiae)
MRPS12	mitochondrial ribosomal protein S12
MSH6	mutS homolog 6 (E. coli)
MST4
MTHFD1L	methylenetetrahydrofolate dehydrogenase (NADP+ dependent) 1-like
MTMR10	myotubularin related protein 10
MTMR9	myotubularin related protein 9
MTUS2
MXD3	MAX dimerization protein 3
MYBL1	v-myb myeloblastosis viral oncogene homolog (avian)-like 1
MYBL2	v-myb myeloblastosis viral oncogene homolog (avian)-like 2
MYO19
NAA50
NAALAD2	N-acetylated alpha-linked acidic dipeptidase 2
NAMPT
NANP	N-acetylneuraminic acid phosphatase
NAP1L1	nucleosome assembly protein 1-like 1
NASP	nuclear autoantigenic sperm protein (histone-binding)
NAV1	neuron navigator 1
NCAPD2	non-SMC condensin I complex, subunit D2
NCAPD3	non-SMC condensin II complex, subunit D3
NCAPG	non-SMC condensin I complex, subunit G
NCAPG2	non-SMC condensin II complex, subunit G2
NCAPH	non-SMC condensin I complex, subunit H
ND6	mitochondrially encoded NADH dehydrogenase 6
NDC80
NDE1	nudE nuclear distribution gene E homolog 1 (A. nidulans)
NEAT1
NEDD4	neural precursor cell expressed, developmentally down-regulated 4
NEIL3	nei endonuclease VIII-like 3 (E. coli)
NEK2	NIMA (never in mitosis gene a)-related kinase 2
NETO2	neuropilin (NRP) and tolloid (TLL)-like 2
NEXN	nexilin (F actin binding protein)
NFRKB	nuclear factor related to kappaB binding protein
NOC2L	nucleolar complex associated 2 homolog (S. cerevisiae)
NOL10	nucleolar protein 10
NPIPL3
NPTX2	neuronal pentraxin II
NRGN	neurogranin (protein kinase C substrate, RC3)
NRM	nurim (nuclear envelope membrane protein)
NRN1	neuritin 1
NRP2	neuropilin 2
NUF2
NUP210	nucleoporin 210kDa
NUP214	nucleoporin 214kDa
NUP98	nucleoporin 98kDa
NUPL1	nucleoporin like 1
NUSAP1	nucleolar and spindle associated protein 1
NXPH1	neurexophilin 1
NXPH2	neurexophilin 2
NXT2	nuclear transport factor 2-like export factor 2
OAF	OAF homolog (Drosophila)
OAS1	2',5'-oligoadenylate synthetase 1, 40/46kDa
OIP5	Opa interacting protein 5
OPN3	opsin 3 (encephalopsin, panopsin)
ORC1
ORC6
PABPC4L	poly(A) binding protein, cytoplasmic 4-like
PALLD	palladin, cytoskeletal associated protein
PASK	PAS domain containing serine/threonine kinase
PBK	PDZ binding kinase
PCBP2	poly(rC) binding protein 2
PCDH19	protocadherin 19
PCGF6	polycomb group ring finger 6
PCNX	pecanex homolog (Drosophila)
PCOLCE2	procollagen C-endopeptidase enhancer 2
PCSK1	proprotein convertase subtilisin/kexin type 1
PDE4B	phosphodiesterase 4B, cAMP-specific (phosphodiesterase E4 dunce homolog, Drosophila)
PDLIM1	PDZ and LIM domain 1 (elfin)
PDLIM3	PDZ and LIM domain 3
PDS5B
PDZRN3	PDZ domain containing RING finger 3
PEF1	penta-EF-hand domain containing 1
PER2	period homolog 2 (Drosophila)
PHB	prohibitin
PHF19	PHD finger protein 19
PHF5A	PHD finger protein 5A
PHGDH	phosphoglycerate dehydrogenase
PIF1
PKMYT1	protein kinase, membrane associated tyrosine/threonine 1
PKP4	plakophilin 4
PLBD1
PLIN2
PLK1	polo-like kinase 1 (Drosophila)
PLK4	polo-like kinase 4 (Drosophila)
PLOD2	procollagen-lysine, 2-oxoglutarate 5-dioxygenase 2
PLS1	plastin 1 (I isoform)
PLSCR1	phospholipid scramblase 1
PMF1	polyamine-modulated factor 1
POC1A
POLA1	polymerase (DNA directed), alpha 1
POLA2	polymerase (DNA directed), alpha 2 (70kD subunit)
POLD1	polymerase (DNA directed), delta 1, catalytic subunit 125kDa
POLD3	polymerase (DNA-directed), delta 3, accessory subunit
POLE	polymerase (DNA directed), epsilon
POLE2	polymerase (DNA directed), epsilon 2 (p59 subunit)
POLQ	polymerase (DNA directed), theta
PON2	paraoxonase 2
PPP1R11	protein phosphatase 1, regulatory (inhibitor) subunit 11
PPP2R2B	protein phosphatase 2 (formerly 2A), regulatory subunit B (PR 52), beta isoform
PRC1	protein regulator of cytokinesis 1
PRIM1	primase, polypeptide 1, 49kDa
PRIMA1	proline rich membrane anchor 1
PRR11	proline rich 11
PRTFDC1	phosphoribosyl transferase domain containing 1
PSMC3IP	PSMC3 interacting protein
PSRC1	proline/serine-rich coiled-coil 1
PTPN2	protein tyrosine phosphatase, non-receptor type 2
PTPRO	protein tyrosine phosphatase, receptor type, O
PTTG1	pituitary tumor-transforming 1
PTTG3P
PVRL1	poliovirus receptor-related 1 (herpesvirus entry mediator C; nectin)
PXMP2	peroxisomal membrane protein 2, 22kDa
QPRT	quinolinate phosphoribosyltransferase (nicotinate-nucleotide pyrophosphorylase (carboxylating))
R3HDM1	R3H domain containing 1
RAB31	RAB31, member RAS oncogene family
RAB3C	RAB3C, member RAS oncogene family
RAB7L1	RAB7, member RAS oncogene family-like 1
RAD18	RAD18 homolog (S. cerevisiae)
RAD51	RAD51 homolog (RecA homolog, E. coli) (S. cerevisiae)
RAD51AP1	RAD51 associated protein 1
RAD51L3	RAD51-like 3 (S. cerevisiae)
RAD54B	RAD54 homolog B (S. cerevisiae)
RAD54L	RAD54-like (S. cerevisiae)
RAD9A	RAD9 homolog A (S. pombe)
RBBP4	retinoblastoma binding protein 4
RBL1	retinoblastoma-like 1 (p107)
RBM14	RNA binding motif protein 14
RBM15	RNA binding motif protein 15
RBPMS	RNA binding protein with multiple splicing
RBPMS2	RNA binding protein with multiple splicing 2
RC3H2
RCAN1
RDM1	RAD52 motif 1
RDX	radixin
REEP4	receptor accessory protein 4
RFC2	replication factor C (activator 1) 2, 40kDa
RFC4	replication factor C (activator 1) 4, 37kDa
RFC5	replication factor C (activator 1) 5, 36.5kDa
RFXAP	regulatory factor X-associated protein
RGMB	RGM domain family, member B
RIBC2	RIB43A domain with coiled-coils 2
RIMS3	regulating synaptic membrane exocytosis 3
RIPK2	receptor-interacting serine-threonine kinase 2
RNASEH1	ribonuclease H1
RNASEH2A	ribonuclease H2, subunit A
RNASEH2B	ribonuclease H2, subunit B
RNASEH2C	ribonuclease H2, subunit C
RPAP1	RNA polymerase II associated protein 1
RPIA	ribose 5-phosphate isomerase A (ribose 5-phosphate epimerase)
RPL27A	ribosomal protein L27a
RPL39L	ribosomal protein L39-like
RPP25	ribonuclease P 25kDa subunit
RPS28	ribosomal protein S28
RRAS2	related RAS viral (r-ras) oncogene homolog 2
RRM1	ribonucleotide reductase M1 polypeptide
RRM2	ribonucleotide reductase M2 polypeptide
RUNX1T1	runt-related transcription factor 1; translocated to, 1 (cyclin D-related)
SAC3D1	SAC3 domain containing 1
SCARA3	scavenger receptor class A, member 3
SCGN	secretagogin, EF-hand calcium binding protein
SCMH1	sex comb on midleg homolog 1 (Drosophila)
SCRIB	scribbled homolog (Drosophila)
SDC1	syndecan 1
SDC2	syndecan 2 (heparan sulfate proteoglycan 1, cell surface-associated, fibroglycan)
SEMA6A	sema domain, transmembrane domain (TM), and cytoplasmic domain, (semaphorin) 6A
SEZ6	seizure related 6 homolog (mouse)
SFXN2	sideroflexin 2
SFXN3	sideroflexin 3
SGOL1	shugoshin-like 1 (S. pombe)
SGOL2	shugoshin-like 2 (S. pombe)
SGPP1	sphingosine-1-phosphate phosphatase 1
SH3GL1	SH3-domain GRB2-like 1
SHCBP1	SHC SH2-domain binding protein 1
SHMT1	serine hydroxymethyltransferase 1 (soluble)
SHMT2	serine hydroxymethyltransferase 2 (mitochondrial)
SIVA1
SKA1
SKA3
SKP2	S-phase kinase-associated protein 2 (p45)
SLC18A1	solute carrier family 18 (vesicular monoamine), member 1
SLC1A3	solute carrier family 1 (glial high affinity glutamate transporter), member 3
SLC29A1	solute carrier family 29 (nucleoside transporters), member 1
SLC2A1	solute carrier family 2 (facilitated glucose transporter), member 1
SLC2A13	solute carrier family 2 (facilitated glucose transporter), member 13
SLC30A6	solute carrier family 30 (zinc transporter), member 6
SLC39A8	solute carrier family 39 (zinc transporter), member 8
SLC44A1	solute carrier family 44, member 1
SLC6A15	solute carrier family 6, member 15
SLC7A5	solute carrier family 7 (cationic amino acid transporter, y+ system), member 5
SLC8A1	solute carrier family 8 (sodium/calcium exchanger), member 1
SLCO4A1	solute carrier organic anion transporter family, member 4A1
SLIT2	slit homolog 2 (Drosophila)
SLITRK5	SLIT and NTRK-like family, member 5
SMC2	structural maintenance of chromosomes 2
SMC4	structural maintenance of chromosomes 4
SMTNL2	smoothelin-like 2
SMYD2	SET and MYND domain containing 2
SNAI2	snail homolog 2 (Drosophila)
SNCA	synuclein, alpha (non A4 component of amyloid precursor)
SNHG1	small nucleolar RNA host gene (non-protein coding) 1
SNHG7	small nucleolar RNA host gene (non-protein coding) 7
SNORD114-3	small nucleolar RNA, C/D box 114-3
SNRNP25
SNRNP48
SNX12	sorting nexin 12
SNX5	sorting nexin 5
SOAT1	sterol O-acyltransferase (acyl-Coenzyme A: cholesterol acyltransferase) 1
SOX2	SRY (sex determining region Y)-box 2
SPAG5	sperm associated antigen 5
SPARC	secreted protein, acidic, cysteine-rich (osteonectin)
SPATA18	spermatogenesis associated 18 homolog (rat)
SPC24
SPC25
SPG20	spastic paraplegia 20, spartin (Troyer syndrome)
SPOCK3	sparc/osteonectin, cwcv and kazal-like domains proteoglycan (testican) 3
SRGAP2	SLIT-ROBO Rho GTPase activating protein 2
SRGAP2P1
SSFA2	sperm specific antigen 2
SST	somatostatin
STAG1	stromal antigen 1
STC2	stanniocalcin 2
STIL	SCL/TAL1 interrupting locus
SURF4	surfeit 4
SVIP
SWAP70	-
SYMPK	symplekin
SYNCRIP	synaptotagmin binding, cytoplasmic RNA interacting protein
SYT1	synaptotagmin I
TACC1	transforming, acidic coiled-coil containing protein 1
TACC3	transforming, acidic coiled-coil containing protein 3
TAF15	TAF15 RNA polymerase II, TATA box binding protein (TBP)-associated factor, 68kDa
TAF3	TAF3 RNA polymerase II, TATA box binding protein (TBP)-associated factor, 140kDa
TAF5	TAF5 RNA polymerase II, TATA box binding protein (TBP)-associated factor, 100kDa
TAF5L	TAF5-like RNA polymerase II, p300/CBP-associated factor (PCAF)-associated factor, 65kDa
TARDBP	TAR DNA binding protein
TAX1BP3	Tax1 (human T-cell leukemia virus type I) binding protein 3
TBCD	tubulin-specific chaperone d
TCF19	transcription factor 19 (SC1)
TEX15	testis expressed sequence 15
TIFA	-
TIMELESS	timeless homolog (Drosophila)
TIMM10	translocase of inner mitochondrial membrane 10 homolog (yeast)
TK1	thymidine kinase 1, soluble
TKT	transketolase (Wernicke-Korsakoff syndrome)
TLE1	transducin-like enhancer of split 1 (E(sp1) homolog, Drosophila)
TM7SF3	transmembrane 7 superfamily member 3
TMED4	transmembrane emp24 protein transport domain containing 4
TMEM100	transmembrane protein 100
TMEM109	transmembrane protein 109
TMEM133	transmembrane protein 133
TMEM194A
TMEM200A
TMEM201
TMEM33	transmembrane protein 33
TMEM45A	transmembrane protein 45A
TMEM48	transmembrane protein 48
TMEM70	transmembrane protein 70
TMEM97	transmembrane protein 97
TMEM98	transmembrane protein 98
TMPO	thymopoietin
TMSB15A
TMTC3	transmembrane and tetratricopeptide repeat containing 3
TNFAIP8	tumor necrosis factor, alpha-induced protein 8
TNNT2	troponin T type 2 (cardiac)
TNS3	tensin 3
TOP2A	topoisomerase (DNA) II alpha 170kDa
TPD52	tumor protein D52
TPX2	TPX2, microtubule-associated, homolog (Xenopus laevis)
TRAC	T cell receptor alpha constant
TRAM2	translocation associated membrane protein 2
TRIM13	tripartite motif-containing 13
TRIM14	tripartite motif-containing 14
TRIM29	tripartite motif-containing 29
TRIM32	tripartite motif-containing 32
TRIM59	tripartite motif-containing 59
TROAP	trophinin associated protein (tastin)
TSEN15
TSN	translin
TTK	TTK protein kinase
TTLL4	tubulin tyrosine ligase-like family, member 4
TUBD1	tubulin, delta 1
TUSC1	tumor suppressor candidate 1
TYMS	thymidylate synthetase
UBE2C	ubiquitin-conjugating enzyme E2C
UBE2K
UBE2L3	ubiquitin-conjugating enzyme E2L 3
UBE2T	ubiquitin-conjugating enzyme E2T (putative)
UGGT2
UNG	uracil-DNA glycosylase
USP1	ubiquitin specific peptidase 1
VCAN
VCL	vinculin
VPS4A	vacuolar protein sorting 4 homolog A (S. cerevisiae)
VRK1	vaccinia related kinase 1
VTI1B	vesicle transport through interaction with t-SNAREs homolog 1B (yeast)
WDHD1	WD repeat and HMG-box DNA binding protein 1
WDR62	WD repeat domain 62
WDR76	WD repeat domain 76
WDYHV1
WEE1	WEE1 homolog (S. pombe)
WHSC1	Wolf-Hirschhorn syndrome candidate 1
WRNIP1	Werner helicase interacting protein 1
WT1	Wilms tumor 1
XK	X-linked Kx blood group (McLeod syndrome)
XRCC2	X-ray repair complementing defective repair in Chinese hamster cells 2
XRCC6BP1	XRCC6 binding protein 1
YKT6	YKT6 v-SNARE homolog (S. cerevisiae)
ZAK	-
ZDHHC16	zinc finger, DHHC-type containing 16
ZFPM2	zinc finger protein, multitype 2
ZNF114	zinc finger protein 114
ZNF141	zinc finger protein 141
ZNF207	zinc finger protein 207
ZNF239	zinc finger protein 239
ZNF367	zinc finger protein 367
ZNF395	zinc finger protein 395
ZNF783	zinc finger protein 783
ZNRF3	zinc and ring finger 3
ZWINT	ZW10 interactor

## Sheet: Up by miR-34a
original id	description
MARCHF2	membrane associated ring-CH-type finger 2
MARCHF4	membrane associated ring-CH-type finger 4
MARCHF9	membrane associated ring-CH-type finger 9
SEPTIN11	septin 11
SEPTIN9	septin 9
ABAT	4-aminobutyrate aminotransferase
ABCA12	ATP-binding cassette, sub-family A (ABC1), member 12
ABCC9	ATP-binding cassette, sub-family C (CFTR/MRP), member 9
ABCF3	ATP-binding cassette, sub-family F (GCN20), member 3
ACADSB	acyl-Coenzyme A dehydrogenase, short/branched chain
ACYP2	acylphosphatase 2, muscle type
ADAM19	ADAM metallopeptidase domain 19 (meltrin beta)
ADAM22	ADAM metallopeptidase domain 22
ADAMTS13	ADAM metallopeptidase with thrombospondin type 1 motif, 13
ADD1	adducin 1 (alpha)
ADSSL1	adenylosuccinate synthase like 1
AGPAT3	1-acylglycerol-3-phosphate O-acyltransferase 3
AGPAT4	1-acylglycerol-3-phosphate O-acyltransferase 4 (lysophosphatidic acid acyltransferase, delta)
AGPHD1
AGTPBP1	ATP/GTP binding protein 1
AHNAK	AHNAK nucleoprotein (desmoyokin)
AHNAK2
AHRR	aryl-hydrocarbon receptor repressor
AHSA2	AHA1, activator of heat shock 90kDa protein ATPase homolog 2 (yeast)
AK7	adenylate kinase 7
AKD1
AKT3	v-akt murine thymoma viral oncogene homolog 3 (protein kinase B, gamma)
ALS2CR8	amyotrophic lateral sclerosis 2 (juvenile) chromosome region, candidate 8
ANAPC5	anaphase promoting complex subunit 5
ANGPT2	angiopoietin 2
ANK1	ankyrin 1, erythrocytic
ANKRA2	ankyrin repeat, family A (RFXANK-like), 2
ANKRD26	ankyrin repeat domain 26
ANKRD33B
ANKRD44	ankyrin repeat domain 44
ANKRD46	ankyrin repeat domain 46
ANKRD5	ankyrin repeat domain 5
ANKZF1	ankyrin repeat and zinc finger domain containing 1
ANO3
ANTXR2	anthrax toxin receptor 2
AP2A2	adaptor-related protein complex 2, alpha 2 subunit
AP4M1	adaptor-related protein complex 4, mu 1 subunit
APC2	adenomatosis polyposis coli 2
APOL2	apolipoprotein L, 2
APPBP2	amyloid beta precursor protein (cytoplasmic tail) binding protein 2
AQP11	aquaporin 11
ARFGAP2
ARFIP1	ADP-ribosylation factor interacting protein 1 (arfaptin 1)
ARHGAP18	Rho GTPase activating protein 18
ARHGAP26	Rho GTPase activating protein 26
ARHGEF7	Rho guanine nucleotide exchange factor (GEF) 7
ARID3B	AT rich interactive domain 3B (BRIGHT- like)
ARL4C	ADP-ribosylation factor-like 4C
ARL8A	ADP-ribosylation factor-like 8A
ARMC9	armadillo repeat containing 9
ARRDC4	arrestin domain containing 4
ARSD	arylsulfatase D
ASL	argininosuccinate lyase
ATAT1
ATP11A	ATPase, Class VI, type 11A
ATP1A1OS
ATP5F1	ATP synthase, H+ transporting, mitochondrial F0 complex, subunit B1
ATP6AP1L
ATP6V1G1	ATPase, H+ transporting, lysosomal 13kDa, V1 subunit G1
ATP7A	ATPase, Cu++ transporting, alpha polypeptide (Menkes syndrome)
ATP9A	ATPase, Class II, type 9A
ATRN	attractin
ATXN7L1	ataxin 7-like 1
B3GALT2	UDP-Gal:betaGlcNAc beta 1,3-galactosyltransferase, polypeptide 2
B3GNTL1	UDP-GlcNAc:betaGal beta-1,3-N-acetylglucosaminyltransferase-like 1
B9D1
B9D2
BACE1	beta-site APP-cleaving enzyme 1
BAT5	HLA-B associated transcript 5
BBS12
BBS2	Bardet-Biedl syndrome 2
BBS9
BCAN	brevican
BCR	breakpoint cluster region
BDNF	brain-derived neurotrophic factor
BEND5
BICD1	bicaudal D homolog 1 (Drosophila)
BIK	BCL2-interacting killer (apoptosis-inducing)
BOD1L
BPHL	biphenyl hydrolase-like (serine hydrolase; breast epithelial mucin-associated antigen)
BRWD1	bromodomain and WD repeat domain containing 1
BSDC1	BSD domain containing 1
BTG1	B-cell translocation gene 1, anti-proliferative
C10ORF118	chromosome 10 open reading frame 118
C10ORF125	chromosome 10 open reading frame 125
C10ORF32	chromosome 10 open reading frame 32
C10ORF46	chromosome 10 open reading frame 46
C10ORF93	chromosome 10 open reading frame 93
C11ORF65	chromosome 11 open reading frame 65
C11ORF70	chromosome 11 open reading frame 70
C12ORF55	chromosome 12 open reading frame 55
C12ORF68
C12ORF76
C14ORF159	chromosome 14 open reading frame 159
C14ORF179	chromosome 14 open reading frame 179
C14ORF39	chromosome 14 open reading frame 39
C14ORF45	chromosome 14 open reading frame 45
C14ORF79	chromosome 14 open reading frame 79
C15ORF17	chromosome 15 open reading frame 17
C15ORF37	chromosome 15 open reading frame 37
C15ORF57
C16ORF46	chromosome 16 open reading frame 46
C16ORF68	chromosome 16 open reading frame 68
C16ORF93
C17ORF103
C17ORF91
C17ORF97
C18ORF32
C19ORF12	chromosome 19 open reading frame 12
C19ORF20	chromosome 19 open reading frame 20
C19ORF30	chromosome 19 open reading frame 30
C1ORF114	chromosome 1 open reading frame 114
C1ORF230
C1ORF25	chromosome 1 open reading frame 25
C1ORF97	chromosome 1 open reading frame 97
C20ORF12	chromosome 20 open reading frame 12
C20ORF194	chromosome 20 open reading frame 194
C20ORF195	chromosome 20 open reading frame 195
C21ORF119	chromosome 21 open reading frame 119
C2ORF39	chromosome 2 open reading frame 39
C2ORF77
C4ORF34	chromosome 4 open reading frame 34
C5ORF36
C5ORF41
C6ORF120	chromosome 6 open reading frame 120
C6ORF154	chromosome 6 open reading frame 154
C6ORF164	chromosome 6 open reading frame 164
C6ORF165	chromosome 6 open reading frame 165
C6ORF168	chromosome 6 open reading frame 168
C6ORF170	chromosome 6 open reading frame 170
C6ORF70	chromosome 6 open reading frame 70
C7	complement component 7
C7ORF31	chromosome 7 open reading frame 31
C7ORF51
C7ORF63
C8ORF42	chromosome 8 open reading frame 42
C8ORF48	chromosome 8 open reading frame 48
C9ORF116	chromosome 9 open reading frame 116
C9ORF119	chromosome 9 open reading frame 119
C9ORF135	chromosome 9 open reading frame 135
C9ORF150	chromosome 9 open reading frame 150
C9ORF9	chromosome 9 open reading frame 9
C9ORF98	chromosome 9 open reading frame 98
CAB39L	calcium binding protein 39-like
CACNA1B	calcium channel, voltage-dependent, L type, alpha 1B subunit
CACNA2D3	calcium channel, voltage-dependent, alpha 2/delta 3 subunit
CADM2
CADPS	Ca2+-dependent secretion activator
CALM1	calmodulin 1 (phosphorylase kinase, delta)
CALY
CAMK1D	calcium/calmodulin-dependent protein kinase ID
CAMTA1	calmodulin binding transcription activator 1
CAP2	CAP, adenylate cyclase-associated protein, 2 (yeast)
CAPRIN1
CASC1	cancer susceptibility candidate 1
CASD1	CAS1 domain containing 1
CBLB	Cas-Br-M (murine) ecotropic retroviral transforming sequence b
CBY1
CCDC104	coiled-coil domain containing 104
CCDC113	coiled-coil domain containing 113
CCDC121	coiled-coil domain containing 121
CCDC123	coiled-coil domain containing 123
CCDC151
CCDC157
CCDC159
CCDC40	coiled-coil domain containing 40
CCDC53	coiled-coil domain containing 53
CCDC65	coiled-coil domain containing 65
CCDC78	coiled-coil domain containing 78
CCDC96	coiled-coil domain containing 96
CCNG2	cyclin G2
CCNI	cyclin I
CCNT2	cyclin T2
CD44	CD44 molecule (Indian blood group)
CD59	CD59 molecule, complement regulatory protein
CDC37L1	CDC37 cell division cycle 37 homolog (S. cerevisiae)-like 1
CDH12	cadherin 12, type 2 (N-cadherin 2)
CDK10	cyclin-dependent kinase (CDC2-like) 10
CDK16
CDK20
CDK5R1	cyclin-dependent kinase 5, regulatory subunit 1 (p35)
CDKAL1	CDK5 regulatory subunit associated protein 1-like 1
CDKL3	cyclin-dependent kinase-like 3
CDRT4	CMT1A duplicated region transcript 4
CELF3
CELF4
CEP120
CEP164	centrosomal protein 164kDa
CEP290	centrosomal protein 290kDa
CEP97
CHGB	chromogranin B (secretogranin 1)
CHKB	choline kinase beta
CHM	choroideremia (Rab escort protein 1)
CHN2	chimerin (chimaerin) 2
CHODL	chondrolectin
CHP	-
CHRM3	cholinergic receptor, muscarinic 3
CIRBP	cold inducible RNA binding protein
CLCN5	chloride channel 5 (nephrolithiasis 2, X-linked, Dent disease)
CLIP1
CLIP3
CLIP4
CLN8	ceroid-lipofuscinosis, neuronal 8 (epilepsy, progressive with mental retardation)
CLUAP1	clusterin associated protein 1
CLYBL	citrate lyase beta like
CMPK1
CNGB1	cyclic nucleotide gated channel beta 1
CNKSR2	connector enhancer of kinase suppressor of Ras 2
CNTN1	contactin 1
COG5	component of oligomeric golgi complex 5
COL5A2	collagen, type V, alpha 2
COL6A1	collagen, type VI, alpha 1
COPA	coatomer protein complex, subunit alpha
COPG2	coatomer protein complex, subunit gamma 2
COPZ1	coatomer protein complex, subunit zeta 1
COQ10B	coenzyme Q10 homolog B (S. cerevisiae)
CORO2B	coronin, actin binding protein, 2B
COX7B	cytochrome c oxidase subunit VIIb
CPEB3	cytoplasmic polyadenylation element binding protein 3
CPEB4	cytoplasmic polyadenylation element binding protein 4
CPPED1
CPXM1	carboxypeptidase X (M14 family), member 1
CREB5	cAMP responsive element binding protein 5
CREBL2	cAMP responsive element binding protein-like 2
CRH	corticotropin releasing hormone
CSRNP3
CST3	cystatin C (amyloid angiopathy and cerebral hemorrhage)
CTSO	cathepsin O
CUL4B	cullin 4B
CUL7	cullin 7
CXADR	coxsackie virus and adenovirus receptor
CXCR4	chemokine (C-X-C motif) receptor 4
CXORF23	chromosome X open reading frame 23
CYB5D1	cytochrome b5 domain containing 1
CYB5D2	cytochrome b5 domain containing 2
CYFIP2	cytoplasmic FMR1 interacting protein 2
CYLD	cylindromatosis (turban tumor syndrome)
CYTH2
DACT3	dapper, antagonist of beta-catenin, homolog 3 (Xenopus laevis)
DALRD3	DALR anticodon binding domain containing 3
DAZAP2	DAZ associated protein 2
DCAF10
DCAF5
DCAF7
DCBLD2	discoidin, CUB and LCCL domain containing 2
DCLK1
DCLK2
DDAH1	dimethylarginine dimethylaminohydrolase 1
DDAH2	dimethylarginine dimethylaminohydrolase 2
DENND2A	DENN/MADD domain containing 2A
DENND5B
DEPDC6	DEP domain containing 6
DFNA5	deafness, autosomal dominant 5
DGKB	diacylglycerol kinase, beta 90kDa
DHDPSL
DLG2	discs, large homolog 2, chapsyn-110 (Drosophila)
DLGAP4	discs, large (Drosophila) homolog-associated protein 4
DLX5	distal-less homeobox 5
DNAH5	dynein, axonemal, heavy chain 5
DNAJB5	DnaJ (Hsp40) homolog, subfamily B, member 5
DNAJC16	DnaJ (Hsp40) homolog, subfamily C, member 16
DNAJC27
DNAJC30
DNAJC4	DnaJ (Hsp40) homolog, subfamily C, member 4
DNAL1	dynein, axonemal, light chain 1
DNALI1	dynein, axonemal, light intermediate chain 1
DNASE1L1	deoxyribonuclease I-like 1
DNM3	dynamin 3
DNMT3A	DNA (cytosine-5-)-methyltransferase 3 alpha
DOCK4	dedicator of cytokinesis 4
DOCK7	dedicator of cytokinesis 7
DOK6	docking protein 6
DPCD
DPYSL3	dihydropyrimidinase-like 3
DPYSL5	dihydropyrimidinase-like 5
DRAM1
DSCAML1	Down syndrome cell adhesion molecule like 1
DUSP1	dual specificity phosphatase 1
DUSP18	dual specificity phosphatase 18
DUSP4	dual specificity phosphatase 4
DUSP5	dual specificity phosphatase 5
DUSP6	dual specificity phosphatase 6
DYNC1I1	dynein, cytoplasmic 1, intermediate chain 1
DYNC2H1	dynein, cytoplasmic 2, heavy chain 1
DYNC2LI1	dynein, cytoplasmic 2, light intermediate chain 1
DYX1C1	dyslexia susceptibility 1 candidate 1
DZIP3	-
EBF1	early B-cell factor 1
EDEM1	ER degradation enhancer, mannosidase alpha-like 1
EFCAB6
EFHA2	EF-hand domain family, member A2
EFHC1	EF-hand domain (C-terminal) containing 1
EFNB3	ephrin-B3
EHD1	EH-domain containing 1
EHD3	EH-domain containing 3
EIF2C2	eukaryotic translation initiation factor 2C, 2
EIF4E3	eukaryotic translation initiation factor 4E member 3
ELAVL2	ELAV (embryonic lethal, abnormal vision, Drosophila)-like 2 (Hu antigen B)
ELAVL4	ELAV (embryonic lethal, abnormal vision, Drosophila)-like 4 (Hu antigen D)
EME2	essential meiotic endonuclease 1 homolog 2 (S. pombe)
EML2	echinoderm microtubule associated protein like 2
EML4	echinoderm microtubule associated protein like 4
EML6
ENKUR
ENPP2	ectonucleotide pyrophosphatase/phosphodiesterase 2 (autotaxin)
ENSA	endosulfine alpha
ENTPD3	ectonucleoside triphosphate diphosphohydrolase 3
ENTPD7	ectonucleoside triphosphate diphosphohydrolase 7
EPCAM
EPHA5	EPH receptor A5
EPHX2	epoxide hydrolase 2, cytoplasmic
EPS8L1	EPS8-like 1
ERCC2	excision repair cross-complementing rodent repair deficiency, complementation group 2 (xeroderma pigmentosum D)
ERLIN2
ETV5	ets variant gene 5 (ets-related molecule)
EXOC7	exocyst complex component 7
FAM116B	family with sequence similarity 116, member B
FAM117B
FAM13A
FAM149B1
FAM164C
FAM174A
FAM184A
FAM18B1
FAM20C	family with sequence similarity 20, member C
FAM89A	family with sequence similarity 89, member A
FAM89B	family with sequence similarity 89, member B
FBLIM1	filamin binding LIM protein 1
FBXL17	F-box and leucine-rich repeat protein 17
FBXO16	F-box protein 16
FBXO28	F-box protein 28
FBXO36	F-box protein 36
FBXW9	F-box and WD-40 domain protein 9
FER	fer (fps/fes related) tyrosine kinase (phosphoprotein NCP94)
FGD4	FYVE, RhoGEF and PH domain containing 4
FGF14	fibroblast growth factor 14
FGF20	fibroblast growth factor 20
FHOD3	formin homology 2 domain containing 3
FIG4
FILIP1	filamin A interacting protein 1
FLCN	folliculin
FLJ20464	-
FLJ22536	-
FLJ27352	-
FLJ35390	-
FLJ39051	-
FLJ90757	-
FLNA	filamin A, alpha (actin binding protein 280)
FLNB	filamin B, beta (actin binding protein 278)
FN1	fibronectin 1
FNBP1	formin binding protein 1
FOS	v-fos FBJ murine osteosarcoma viral oncogene homolog
FRAT1	frequently rearranged in advanced T-cell lymphomas
FRMD4B	FERM domain containing 4B
FRZB	frizzled-related protein
FSD1L	fibronectin type III and SPRY domain containing 1-like
FSIP1	fibrous sheath interacting protein 1
FUCA1	fucosidase, alpha-L- 1, tissue
FXR1	fragile X mental retardation, autosomal homolog 1
FXR2	fragile X mental retardation, autosomal homolog 2
FZD3	frizzled homolog 3 (Drosophila)
FZD5	frizzled homolog 5 (Drosophila)
GAA	glucosidase, alpha; acid (Pompe disease, glycogen storage disease type II)
GAB2	GRB2-associated binding protein 2
GARNL3	GTPase activating Rap/RanGAP domain-like 3
GDI1	GDP dissociation inhibitor 1
GDPD1	glycerophosphodiester phosphodiesterase domain containing 1
GEM	GTP binding protein overexpressed in skeletal muscle
GFOD2	glucose-fructose oxidoreductase domain containing 2
GFPT1	glutamine-fructose-6-phosphate transaminase 1
GLCCI1	glucocorticoid induced transcript 1
GLS	glutaminase
GMIP	GEM interacting protein
GNG2	guanine nucleotide binding protein (G protein), gamma 2
GNG3	guanine nucleotide binding protein (G protein), gamma 3
GNG4	guanine nucleotide binding protein (G protein), gamma 4
GOLGA1	golgi autoantigen, golgin subfamily a, 1
GOLGA2	golgi autoantigen, golgin subfamily a, 2
GOLGB1	golgi autoantigen, golgin subfamily b, macrogolgin (with transmembrane signal), 1
GPATCH2
GPC2	glypican 2 (cerebroglycan)
GPER
GPR137C	G protein-coupled receptor 137C
GPR155	G protein-coupled receptor 155
GPR22	G protein-coupled receptor 22
GRAMD1A	GRAM domain containing 1A
GRAMD1B	GRAM domain containing 1B
GRHL1	grainyhead-like 1 (Drosophila)
GRIPAP1	GRIP1 associated protein 1
GRK4	G protein-coupled receptor kinase 4
GRK5	G protein-coupled receptor kinase 5
GSN	gelsolin (amyloidosis, Finnish type)
GUCA1A	guanylate cyclase activator 1A (retina)
GULP1	GULP, engulfment adaptor PTB domain containing 1
HBP1	HMG-box transcription factor 1
HCFC2	host cell factor C2
HEXDC	hexosaminidase (glycosyl hydrolase family 20, catalytic domain) containing
HINT3	histidine triad nucleotide binding protein 3
HIPK3	homeodomain interacting protein kinase 3
HIST1H2AC	histone cluster 1, H2ac
HIST1H2AE	histone cluster 1, H2ae
HIST1H2AK	histone cluster 1, H2ak
HIST1H2BC	histone cluster 1, H2bc
HIST1H2BG	histone cluster 1, H2bg
HIST1H3E	histone cluster 1, H3e
HIST1H4H	histone cluster 1, H4h
HOMER2	homer homolog 2 (Drosophila)
HOMER3	homer homolog 3 (Drosophila)
HRK	harakiri, BCL2 interacting protein (contains only BH3 domain)
HS6ST3	heparan sulfate 6-O-sulfotransferase 3
HTRA2	HtrA serine peptidase 2
ICAM2	intercellular adhesion molecule 2
IDS	iduronate 2-sulfatase (Hunter syndrome)
IFI16	interferon, gamma-inducible protein 16
IFT27
IFT57	intraflagellar transport 57 homolog (Chlamydomonas)
IFT74	intraflagellar transport 74 homolog (Chlamydomonas)
IFT81	intraflagellar transport 81 homolog (Chlamydomonas)
IFT88	intraflagellar transport 88 homolog (Chlamydomonas)
IGFBP7	insulin-like growth factor binding protein 7
IGLON5
IL15	interleukin 15
IL17RD	interleukin 17 receptor D
IL6ST	interleukin 6 signal transducer (gp130, oncostatin M receptor)
IMPACT	Impact homolog (mouse)
INPP4A	inositol polyphosphate-4-phosphatase, type I, 107kDa
INSR	insulin receptor
INTU
IP6K2
IQCE	IQ motif containing E
IQCG	IQ motif containing G
IQCH	IQ motif containing H
IQCK	IQ motif containing K
IRF6	interferon regulatory factor 6
IRF9
IRS2	insulin receptor substrate 2
ISG15	ISG15 ubiquitin-like modifier
ITGA1	integrin, alpha 1
ITGA6	integrin, alpha 6
ITGBL1	integrin, beta-like 1 (with EGF-like repeat domains)
IVD	isovaleryl Coenzyme A dehydrogenase
JAK1	Janus kinase 1 (a protein tyrosine kinase)
JAKMIP2	janus kinase and microtubule interacting protein 2
JAKMIP3
JHDM1D
KATNAL1	katanin p60 subunit A-like 1
KCNAB1	potassium voltage-gated channel, shaker-related subfamily, beta member 1
KCNJ2	potassium inwardly-rectifying channel, subfamily J, member 2
KCNMB4	potassium large conductance calcium-activated channel, subfamily M, beta member 4
KCNQ2	potassium voltage-gated channel, KQT-like subfamily, member 2
KCTD13	potassium channel tetramerisation domain containing 13
KCTD21	potassium channel tetramerisation domain containing 21
KDM4A
KDM5B
KDM6B
KIAA0232	-
KIAA0408	KIAA0408
KIAA0513	KIAA0513
KIAA0562	KIAA0562
KIAA0649	KIAA0649
KIAA0753	KIAA0753
KIAA0895L
KIAA0913	KIAA0913
KIAA1370	KIAA1370
KIAA1377	KIAA1377
KIAA1549	-
KIAA1712	KIAA1712
KIAA1841	KIAA1841
KIAA1919	KIAA1919
KIF13B	kinesin family member 13B
KIF1B	kinesin family member 1B
KIF3A	kinesin family member 3A
KIF3B	kinesin family member 3B
KIF3C	kinesin family member 3C
KIF5A	kinesin family member 5A
KIF5C	kinesin family member 5C
KIF9	kinesin family member 9
KLC1
KLF9	Kruppel-like factor 9
KLHL24	kelch-like 24 (Drosophila)
KLHL28
KLHL7	kelch-like 7 (Drosophila)
KLRAQ1
KPNA5	karyopherin alpha 5 (importin alpha 6)
LACTB	lactamase, beta
LANCL1	LanC lantibiotic synthetase component C-like 1 (bacterial)
LASS1	LAG1 homolog, ceramide synthase 1 (S. cerevisiae)
LCA5	Leber congenital amaurosis 5
LCOR	ligand dependent nuclear receptor corepressor
LCORL	ligand dependent nuclear receptor corepressor-like
LCP1	lymphocyte cytosolic protein 1 (L-plastin)
LEPR	leptin receptor
LEPREL2	leprecan-like 2
LEPROT	leptin receptor overlapping transcript
LETM2	leucine zipper-EF-hand containing transmembrane protein 2
LGALS3BP	lectin, galactoside-binding, soluble, 3 binding protein
LIMK2	LIM domain kinase 2
LIN7A	lin-7 homolog A (C. elegans)
LIN7B	lin-7 homolog B (C. elegans)
LMBRD2	LMBR1 domain containing 2
LMF1
LMLN	leishmanolysin-like (metallopeptidase M8 family)
LMO2	LIM domain only 2 (rhombotin-like 1)
LMO4	LIM domain only 4
LOC100009676
LOC100128239
LOC100134937
LOC100144603
LOC100287017
LOC100287331
LOC100287482
LOC100287896
LOC100288152
LOC100288617
LOC100288985
LOC100289373
LOC100289410
LOC100379224
LOC100505490
LOC100506019
LOC100506161
LOC100506174
LOC100506295
LOC100506728
LOC100506781
LOC100506844
LOC100506966
LOC100506979
LOC100507039
LOC100507110
LOC100507186
LOC100507255
LOC100507291
LOC100507297
LOC100508307
LOC100509297
LOC147670	-
LOC153682	-
LOC203274	-
LOC255130	-
LOC256021	-
LOC283027	-
LOC283454	-
LOC283547	-
LOC283788	-
LOC284440
LOC285147	-
LOC339803	-
LOC375190	-
LOC400236	-
LOC400604	-
LOC400684	-
LOC400692
LOC401176	-
LOC401233	-
LOC439911	-
LOC440104	-
LOC441617	-
LOC641467	-
LOC642852	-
LOC646934	-
LOC647979	-
LOC728190	-
LOC728485	-
LOC728613	-
LOC729683	-
LONP2
LONRF2	LON peptidase N-terminal domain and ring finger 2
LPAR1
LPPR3
LRGUK
LRRC16A
LRRC23	leucine rich repeat containing 23
LRRC27	leucine rich repeat containing 27
LRRC34	leucine rich repeat containing 34
LRRC4	leucine rich repeat containing 4
LRRC46	leucine rich repeat containing 46
LRRC48	leucine rich repeat containing 48
LRRC63
LRRC8B	leucine rich repeat containing 8 family, member B
LRRFIP1	leucine rich repeat (in FLII) interacting protein 1
LRRTM2	leucine rich repeat transmembrane neuronal 2
LSAMP	limbic system-associated membrane protein
LSM11	LSM11, U7 small nuclear RNA associated
LSM14B	LSM14 homolog B (SCD6, S. cerevisiae)
LTK	leukocyte tyrosine kinase
LYRM1	LYR motif containing 1
MAFB	v-maf musculoaponeurotic fibrosarcoma oncogene homolog B (avian)
MAFF	v-maf musculoaponeurotic fibrosarcoma oncogene homolog F (avian)
MAGI3	membrane associated guanylate kinase, WW and PDZ domain containing 3
MAML2	mastermind-like 2 (Drosophila)
MAN1A2	mannosidase, alpha, class 1A, member 2
MAN2B2	mannosidase, alpha, class 2B, member 2
MAOA	monoamine oxidase A
MAP1B	microtubule-associated protein 1B
MAP1LC3B	microtubule-associated protein 1 light chain 3 beta
MAP2K4	mitogen-activated protein kinase kinase 4
MAP3K1	mitogen-activated protein kinase kinase kinase 1
MAP3K12	mitogen-activated protein kinase kinase kinase 12
MAP3K13	mitogen-activated protein kinase kinase kinase 13
MAP6	microtubule-associated protein 6
MAP9	microtubule-associated protein 9
MAPK10	mitogen-activated protein kinase 10
MAPK8	mitogen-activated protein kinase 8
MAPRE3	microtubule-associated protein, RP/EB family, member 3
MAX	MYC associated factor X
MBNL2	muscleblind-like 2 (Drosophila)
MCCC1	methylcrotonoyl-Coenzyme A carboxylase 1 (alpha)
MCF2L	MCF.2 cell line derived transforming sequence-like
MDH1B	malate dehydrogenase 1B, NAD (soluble)
METRNL	meteorin, glial cell differentiation regulator-like
MFSD10
MFSD6
MGEA5	meningioma expressed antigen 5 (hyaluronidase)
MIAT
MICAL1	microtubule associated monoxygenase, calponin and LIM domain containing 1
MKRN1	makorin, ring finger protein, 1
MLF1	myeloid leukemia factor 1
MMP15	matrix metallopeptidase 15 (membrane-inserted)
MORN2	MORN repeat containing 2
MOSPD3	motile sperm domain containing 3
MPG	N-methylpurine-DNA glycosylase
MRAP2
MREG
MRS2
MSI2	musashi homolog 2 (Drosophila)
MSX1	msh homeobox homolog 1 (Drosophila)
MT1F	metallothionein 1F (functional)
MT1X	metallothionein 1X
MTMR3	myotubularin related protein 3
MUDENG
MUM1	melanoma associated antigen (mutated) 1
MXD1	MAX dimerization protein 1
MXD4	MAX dimerization protein 4
MYH15	myosin, heavy chain 15
MYL5	myosin, light chain 5, regulatory
MYST4	MYST histone acetyltransferase (monocytic leukemia) 4
MYT1	myelin transcription factor 1
MYT1L	myelin transcription factor 1-like
NACAD
NAPB	N-ethylmaleimide-sensitive factor attachment protein, beta
NAT1	N-acetyltransferase 1 (arylamine N-acetyltransferase)
NAT14	N-acetyltransferase 14
NBAS
NBEA	neurobeachin
NCOA1	nuclear receptor coactivator 1
NCOA3	nuclear receptor coactivator 3
NCRNA00094
NCRNA00171
NCRNA00247
NDRG4	NDRG family member 4
NDST2	N-deacetylase/N-sulfotransferase (heparan glucosaminyl) 2
NDUFS1	NADH dehydrogenase (ubiquinone) Fe-S protein 1, 75kDa (NADH-coenzyme Q reductase)
NECAB3
NEDD4L	neural precursor cell expressed, developmentally down-regulated 4-like
NEDD9	neural precursor cell expressed, developmentally down-regulated 9
NEK11	NIMA (never in mitosis gene a)- related kinase 11
NELF	nasal embryonic LHRH factor
NFASC	neurofascin homolog (chicken)
NFATC2IP	nuclear factor of activated T-cells, cytoplasmic, calcineurin-dependent 2 interacting protein
NFYA	nuclear transcription factor Y, alpha
NHLRC3
NINL
NLK	nemo-like kinase
NME3	non-metastatic cells 3, protein expressed in
NME5	non-metastatic cells 5, protein expressed in (nucleoside-diphosphate kinase)
NMNAT2	nicotinamide nucleotide adenylyltransferase 2
NOX3	NADPH oxidase 3
NPHP1	nephronophthisis 1 (juvenile)
NPHP3	nephronophthisis 3 (adolescent)
NPR2	natriuretic peptide receptor B/guanylate cyclase B (atrionatriuretic peptide receptor B)
NRBP1	nuclear receptor binding protein 1
NT5E	5'-nucleotidase, ecto (CD73)
NTRK1	neurotrophic tyrosine kinase, receptor, type 1
NUBPL	nucleotide binding protein-like
NUDT14	nudix (nucleoside diphosphate linked moiety X)-type motif 14
NUDT7	nudix (nucleoside diphosphate linked moiety X)-type motif 7
OAZ3	ornithine decarboxylase antizyme 3
ODF2L	outer dense fiber of sperm tails 2-like
ODZ4	odz, odd Oz/ten-m homolog 4 (Drosophila)
OGDHL	oxoglutarate dehydrogenase-like
OGT	O-linked N-acetylglucosamine (GlcNAc) transferase (UDP-N-acetylglucosamine:polypeptide-N-acetylglucosaminyl transferase)
ONECUT2	one cut domain, family member 2
OPRM1	opioid receptor, mu 1
OPTN	optineurin
ORAI2
OSCP1
OSTM1	osteopetrosis associated transmembrane protein 1
OTUB2	OTU domain, ubiquitin aldehyde binding 2
OTUD1	OTU domain containing 1
OTUD5	OTU domain containing 5
P4HTM
PACRG	PARK2 co-regulated
PACRGL
PAK3	p21 (CDKN1A)-activated kinase 3
PALMD	palmdelphin
PARM1
PATZ1	POZ (BTB) and AT hook containing zinc finger 1
PBLD
PBXIP1	pre-B-cell leukemia transcription factor interacting protein 1
PCDHB10	protocadherin beta 10
PCDHB14	protocadherin beta 14
PCDHB15	protocadherin beta 15
PCDHB16	protocadherin beta 16
PCDHB18	protocadherin beta 18 pseudogene
PCDHB2	protocadherin beta 2
PCDHB3	protocadherin beta 3
PCDHB6	protocadherin beta 6
PCDHB7	protocadherin beta 7
PCDP1
PCGF3	polycomb group ring finger 3
PCMTD1	protein-L-isoaspartate (D-aspartate) O-methyltransferase domain containing 1
PCNXL2	pecanex-like 2 (Drosophila)
PCSK1N	proprotein convertase subtilisin/kexin type 1 inhibitor
PDE10A	phosphodiesterase 10A
PDE3B	phosphodiesterase 3B, cGMP-inhibited
PDLIM5	PDZ and LIM domain 5
PELO	pelota homolog (Drosophila)
PEX11B	peroxisomal biogenesis factor 11B
PEX12	peroxisomal biogenesis factor 12
PEX19	peroxisomal biogenesis factor 19
PGAM2	phosphoglycerate mutase 2 (muscle)
PHLDA1	pleckstrin homology-like domain, family A, member 1
PHOSPHO2	phosphatase, orphan 2
PHTF1	putative homeodomain transcription factor 1
PI15	peptidase inhibitor 15
PIH1D2
PIK3IP1
PIK3R1	phosphoinositide-3-kinase, regulatory subunit 1 (p85 alpha)
PIK3R3	phosphoinositide-3-kinase, regulatory subunit 3 (p55, gamma)
PISD	phosphatidylserine decarboxylase
PITPNM1	phosphatidylinositol transfer protein, membrane-associated 1
PKIB	protein kinase (cAMP-dependent, catalytic) inhibitor beta
PKIG	protein kinase (cAMP-dependent, catalytic) inhibitor gamma
PLCD4	phospholipase C, delta 4
PLCE1	phospholipase C, epsilon 1
PLCL1	phospholipase C-like 1
PLCXD2	phosphatidylinositol-specific phospholipase C, X domain containing 2
PLCXD3	phosphatidylinositol-specific phospholipase C, X domain containing 3
PLD3	phospholipase D family, member 3
PLD5	phospholipase D family, member 5
PLEKHA3	pleckstrin homology domain containing, family A (phosphoinositide binding specific) member 3
PLEKHA6	pleckstrin homology domain containing, family A member 6
PLK2	polo-like kinase 2 (Drosophila)
PLTP	phospholipid transfer protein
PMP22	peripheral myelin protein 22
PNRC1	proline-rich nuclear receptor coactivator 1
POLD4	polymerase (DNA-directed), delta 4
POLR3GL	polymerase (RNA) III (DNA directed) polypeptide G (32kD) like
POMT1	protein-O-mannosyltransferase 1
PPAPDC1A	phosphatidic acid phosphatase type 2 domain containing 1A
PPAPDC1B	phosphatidic acid phosphatase type 2 domain containing 1B
PPARA	peroxisome proliferative activated receptor, alpha
PPARGC1A	peroxisome proliferative activated receptor, gamma, coactivator 1, alpha
PPFIBP2	PTPRF interacting protein, binding protein 2 (liprin beta 2)
PPIL6	peptidylprolyl isomerase (cyclophilin)-like 6
PPP1R15A	protein phosphatase 1, regulatory (inhibitor) subunit 15A
PPP1R16A	protein phosphatase 1, regulatory (inhibitor) subunit 16A
PPP1R9A	protein phosphatase 1, regulatory (inhibitor) subunit 9A
PPP2R5B	protein phosphatase 2, regulatory subunit B (B56), beta isoform
PPP3CB	protein phosphatase 3 (formerly 2B), catalytic subunit, beta isoform (calcineurin A beta)
PRAF2	PRA1 domain family, member 2
PREPL	prolyl endopeptidase-like
PRIC285	-
PRKACB	protein kinase, cAMP-dependent, catalytic, beta
PRKCH	protein kinase C, eta
PRKCZ	protein kinase C, zeta
PRLHR	prolactin releasing hormone receptor
PRMT2	protein arginine methyltransferase 2
PRR7	proline rich 7 (synaptic)
PRSS12	protease, serine, 12 (neurotrypsin, motopsin)
PRUNE2
PSENEN	presenilin enhancer 2 homolog (C. elegans)
PTN	pleiotrophin (heparin binding growth factor 8, neurite growth-promoting factor 1)
PTPRB	protein tyrosine phosphatase, receptor type, B
PTPRE	protein tyrosine phosphatase, receptor type, E
PTPRF	protein tyrosine phosphatase, receptor type, F
PTPRH	protein tyrosine phosphatase, receptor type, H
PTPRN2	protein tyrosine phosphatase, receptor type, N polypeptide 2
PTPRR	protein tyrosine phosphatase, receptor type, R
PWWP2B
QDPR	quinoid dihydropteridine reductase
RAB11FIP4	RAB11 family interacting protein 4 (class II)
RAB36	RAB36, member RAS oncogene family
RAB39B	RAB39B, member RAS oncogene family
RAB3A	RAB3A, member RAS oncogene family
RAB3D	RAB3D, member RAS oncogene family
RAB40B	RAB40B, member RAS oncogene family
RAB4B	RAB4B, member RAS oncogene family
RAB5B	RAB5B, member RAS oncogene family
RAB6A	RAB6A, member RAS oncogene family
RAB6B	RAB6B, member RAS oncogene family
RABGAP1L	RAB GTPase activating protein 1-like
RABL5	RAB, member RAS oncogene family-like 5
RALGPS1	Ral GEF with PH domain and SH3 binding motif 1
RBKS	ribokinase
RBM4	RNA binding motif protein 4
RBMS3	RNA binding motif, single stranded interacting protein
REEP3	receptor accessory protein 3
RET	ret proto-oncogene (multiple endocrine neoplasia and medullary thyroid carcinoma 1, Hirschsprung disease)
RFTN1	raftlin, lipid raft linker 1
RFX3	regulatory factor X, 3 (influences HLA class II expression)
RFX5	regulatory factor X, 5 (influences HLA class II expression)
RGL2	ral guanine nucleotide dissociation stimulator-like 2
RGS12	regulator of G-protein signalling 12
RGS13	regulator of G-protein signalling 13
RGS3	regulator of G-protein signalling 3
RHCE	Rh blood group, CcEe antigens
RHD	Rh blood group, D antigen
RHOQ	ras homolog gene family, member Q
RIBC1	RIB43A domain with coiled-coils 1
RICTOR	-
RIT1	Ras-like without CAAX 1
RNASET2	ribonuclease T2
RND2	Rho family GTPase 2
RNF123	ring finger protein 123
RNF149	ring finger protein 149
RNF150	ring finger protein 150
RNF165	ring finger protein 165
RNF213
RNF41	ring finger protein 41
ROBO2	roundabout, axon guidance receptor, homolog 2 (Drosophila)
ROPN1L	ropporin 1-like
RORA	RAR-related orphan receptor A
RPS6KA2	ribosomal protein S6 kinase, 90kDa, polypeptide 2
RPS6KA6	ribosomal protein S6 kinase, 90kDa, polypeptide 6
RRAGC	Ras-related GTP binding C
RSPH1
RSPH3
RSPH4A
RTDR1	rhabdoid tumor deletion region gene 1
RTN2	reticulon 2
RUFY2	RUN and FYVE domain containing 2
RUFY3	RUN and FYVE domain containing 3
RUNDC3A
SAMD15
SAMD8	sterile alpha motif domain containing 8
SAMSN1	SAM domain, SH3 domain and nuclear localisation signals, 1
SAT2	spermidine/spermine N1-acetyltransferase 2
SATB1	special AT-rich sequence binding protein 1 (binds to nuclear matrix/scaffold-associating DNA's)
SBF1	SET binding factor 1
SBK1	SH3-binding domain kinase 1
SCARB2	scavenger receptor class B, member 2
SCG5	secretogranin V (7B2 protein)
SCML4	sex comb on midleg-like 4 (Drosophila)
SCN3A	sodium channel, voltage-gated, type III, alpha
SCN3B	sodium channel, voltage-gated, type III, beta
SCN9A	sodium channel, voltage-gated, type IX, alpha
SCRN3	secernin 3
SDSL	serine dehydratase-like
SECISBP2L
SEPSECS
SERINC3	serine incorporator 3
SESN3	sestrin 3
SETD2	SET domain containing 2
SEZ6L2	seizure related 6 homolog (mouse)-like 2
SFXN3	sideroflexin 3
SGSH	N-sulfoglucosamine sulfohydrolase (sulfamidase)
SGSM1
SH2D3C	SH2 domain containing 3C
SH3BP5	SH3-domain binding protein 5 (BTK-associated)
SH3RF1	SH3 domain containing ring finger 1
SHANK3	SH3 and multiple ankyrin repeat domains 3
SHC1	SHC (Src homology 2 domain containing) transforming protein 1
SHC3	SHC (Src homology 2 domain containing) transforming protein 3
SHC4	SHC (Src homology 2 domain containing) family, member 4
SHISA5
SIAE	sialic acid acetylesterase
SIK1
SIK3
SIPA1L1	signal-induced proliferation-associated 1 like 1
SLC22A4	solute carrier family 22 (organic cation transporter), member 4
SLC23A2	solute carrier family 23 (nucleobase transporters), member 2
SLC25A16	solute carrier family 25 (mitochondrial carrier; Graves disease autoantigen), member 16
SLC26A11	solute carrier family 26, member 11
SLC2A11	solute carrier family 2 (facilitated glucose transporter), member 11
SLC30A7	solute carrier family 30 (zinc transporter), member 7
SLC35D2	solute carrier family 35, member D2
SLC35E1	solute carrier family 35, member E1
SLC39A6	solute carrier family 39 (zinc transporter), member 6
SLC41A2	solute carrier family 41, member 2
SLC44A5	solute carrier family 44, member 5
SMAD9	SMAD, mothers against DPP homolog 9 (Drosophila)
SMARCD3	SWI/SNF related, matrix associated, actin dependent regulator of chromatin, subfamily d, member 3
SMURF2	SMAD specific E3 ubiquitin protein ligase 2
SNX21	sorting nexin family member 21
SNX29
SOCS2	suppressor of cytokine signaling 2
SOHLH2	spermatogenesis and oogenesis specific basic helix-loop-helix 2
SOS1	son of sevenless homolog 1 (Drosophila)
SPA17	sperm autoantigenic protein 17
SPAG16	sperm associated antigen 16
SPAG9	sperm associated antigen 9
SPATA17	spermatogenesis associated 17
SPATA2L
SPATA6	spermatogenesis associated 6
SPATA7	spermatogenesis associated 7
SPEF2
SPG7	spastic paraplegia 7, paraplegin (pure and complicated autosomal recessive)
SPTAN1	spectrin, alpha, non-erythrocytic 1 (alpha-fodrin)
SQSTM1	sequestosome 1
SRGAP3	SLIT-ROBO Rho GTPase activating protein 3
SSBP3	single stranded DNA binding protein 3
SSH1	slingshot homolog 1 (Drosophila)
SSTR2	somatostatin receptor 2
ST6GAL2	ST6 beta-galactosamide alpha-2,6-sialyltranferase 2
ST8SIA1	ST8 alpha-N-acetyl-neuraminide alpha-2,8-sialyltransferase 1
ST8SIA2	ST8 alpha-N-acetyl-neuraminide alpha-2,8-sialyltransferase 2
ST8SIA4	ST8 alpha-N-acetyl-neuraminide alpha-2,8-sialyltransferase 4
STAG3L4
STAM2	signal transducing adaptor molecule (SH3 domain and ITAM motif) 2
STARD10	START domain containing 10
STAT3	signal transducer and activator of transcription 3 (acute-phase response factor)
STC1	stanniocalcin 1
STK10	serine/threonine kinase 10
STK36	serine/threonine kinase 36 (fused homolog, Drosophila)
STMN4	stathmin-like 4
STS	steroid sulfatase (microsomal), arylsulfatase C, isozyme S
STX12	syntaxin 12
STX4	syntaxin 4
STXBP5	syntaxin binding protein 5 (tomosyn)
STYX	serine/threonine/tyrosine interacting protein
SUMF1	sulfatase modifying factor 1
SUSD1	sushi domain containing 1
SYBU
SYNGR3	synaptogyrin 3
SYNRG
SYT11	synaptotagmin XI
TADA3
TAF13	TAF13 RNA polymerase II, TATA box binding protein (TBP)-associated factor, 18kDa
TAGLN3	transgelin 3
TAOK3	TAO kinase 3
TBC1D16	TBC1 domain family, member 16
TBC1D19	TBC1 domain family, member 19
TBC1D9	TBC1 domain family, member 9 (with GRAM domain)
TCTN1
TCTN2
TDRD7	tudor domain containing 7
TECPR2
TEP1	telomerase-associated protein 1
TEX9	testis expressed sequence 9
TGFB1	transforming growth factor, beta 1 (Camurati-Engelmann disease)
THAP2	THAP domain containing, apoptosis associated protein 2
THBS3	thrombospondin 3
THSD7A
TM7SF2	transmembrane 7 superfamily member 2
TMEM121	transmembrane protein 121
TMEM132A	transmembrane protein 132A
TMEM134	transmembrane protein 134
TMEM150C
TMEM187
TMEM231
TMEM27	transmembrane protein 27
TMEM30A	transmembrane protein 30A
TMEM38A	transmembrane protein 38A
TMEM53	transmembrane protein 53
TMEM67	transmembrane protein 67
TMEM87B	transmembrane protein 87B
TMEM9B	TMEM9 domain family, member B
TMOD1	tropomodulin 1
TMTC2	transmembrane and tetratricopeptide repeat containing 2
TMTC4	transmembrane and tetratricopeptide repeat containing 4
TNFRSF19	tumor necrosis factor receptor superfamily, member 19
TNFSF4	tumor necrosis factor (ligand) superfamily, member 4 (tax-transcriptionally activated glycoprotein 1, 34kDa)
TOLLIP	toll interacting protein
TOMM40L	translocase of outer mitochondrial membrane 40 homolog-like (yeast)
TP53BP1	tumor protein p53 binding protein, 1
TP53INP1	tumor protein p53 inducible nuclear protein 1
TPCN2	two pore segment channel 2
TPM3	tropomyosin 3
TPPP3
TPRG1L
TRAK1	trafficking protein, kinesin binding 1
TRIM23	tripartite motif-containing 23
TRIM36	tripartite motif-containing 36
TRIM46	tripartite motif-containing 46
TRPM8	transient receptor potential cation channel, subfamily M, member 8
TSC1	tuberous sclerosis 1
TSC22D3	TSC22 domain family, member 3
TSHZ2	teashirt family zinc finger 2
TSNAXIP1	translin-associated factor X interacting protein 1
TSPAN31	tetraspanin 31
TSPAN7	tetraspanin 7
TTC12	tetratricopeptide repeat domain 12
TTC25	tetratricopeptide repeat domain 25
TTC3	tetratricopeptide repeat domain 3
TTC30A	tetratricopeptide repeat domain 30A
TTC30B	tetratricopeptide repeat domain 30B
TTLL1	tubulin tyrosine ligase-like family, member 1
TTPAL
TUBB4	tubulin, beta 4
TUBG2	tubulin, gamma 2
UBE2H	ubiquitin-conjugating enzyme E2H (UBC8 homolog, yeast)
UBE2Q2	ubiquitin-conjugating enzyme E2Q (putative) 2
UBXN10
UCKL1	uridine-cytidine kinase 1-like 1
UNC13A	unc-13 homolog A (C. elegans)
UPB1	ureidopropionase, beta
USP21	ubiquitin specific peptidase 21
VANGL2	vang-like 2 (van gogh, Drosophila)
VASH1	vasohibin 1
VASH2	vasohibin 2
VIP	vasoactive intestinal peptide
VLDLR	very low density lipoprotein receptor
VPS33B	vacuolar protein sorting 33B (yeast)
VPS53	vacuolar protein sorting 53 (S. cerevisiae)
VPS54	vacuolar protein sorting 54 (S. cerevisiae)
VRK3	vaccinia related kinase 3
WBP2	WW domain binding protein 2
WDR19	WD repeat domain 19
WDR20	WD repeat domain 20
WDR31	WD repeat domain 31
WDR45	WD repeat domain 45
WDR47	WD repeat domain 47
WDR60	WD repeat domain 60
WDR66	WD repeat domain 66
WDR73	WD repeat domain 73
WDR78	WD repeat domain 78
WDR86	WD repeat domain 86
WIPI1	WD repeat domain, phosphoinositide interacting 1
XKR6	XK, Kell blood group complex subunit-related family, member 6
XPR1	xenotropic and polytropic retrovirus receptor
YIPF6	Yip1 domain family, member 6
YOD1	YOD1 OTU deubiquinating enzyme 1 homolog (S. cerevisiae)
YPEL2	yippee-like 2 (Drosophila)
YPEL3	yippee-like 3 (Drosophila)
YPEL5	yippee-like 5 (Drosophila)
ZBED6
ZBTB4	zinc finger and BTB domain containing 4
ZBTB46	zinc finger and BTB domain containing 46
ZC3H6	zinc finger CCCH-type containing 6
ZER1
ZFP14	zinc finger protein 14 homolog (mouse)
ZFP37	zinc finger protein 37 homolog (mouse)
ZFP90	zinc finger protein 90 homolog (mouse)
ZKSCAN1	zinc finger with KRAB and SCAN domains 1
ZNF10	zinc finger protein 10
ZNF117	zinc finger protein 117
ZNF140	zinc finger protein 140
ZNF165	zinc finger protein 165
ZNF174	zinc finger protein 174
ZNF177	zinc finger protein 177
ZNF226	zinc finger protein 226
ZNF233	zinc finger protein 233
ZNF25	zinc finger protein 25
ZNF254	zinc finger protein 254
ZNF264	zinc finger protein 264
ZNF271	zinc finger protein 271
ZNF280D
ZNF323	zinc finger protein 323
ZNF329	zinc finger protein 329
ZNF404	zinc finger protein 404
ZNF416	zinc finger protein 416
ZNF419
ZNF420	zinc finger protein 420
ZNF44	zinc finger protein 44
ZNF441	zinc finger protein 441
ZNF446	zinc finger protein 446
ZNF451	zinc finger protein 451
ZNF471	zinc finger protein 471
ZNF514	zinc finger protein 514
ZNF528	zinc finger protein 528
ZNF529	zinc finger protein 529
ZNF540	zinc finger protein 540
ZNF556	zinc finger protein 556
ZNF558	zinc finger protein 558
ZNF584	zinc finger protein 584
ZNF585A	zinc finger protein 585A
ZNF599	zinc finger protein 599
ZNF606	zinc finger protein 606
ZNF609	zinc finger protein 609
ZNF610	zinc finger protein 610
ZNF616	zinc finger protein 616
ZNF621	zinc finger protein 621
ZNF626	zinc finger protein 626
ZNF641	zinc finger protein 641
ZNF652	zinc finger protein 652
ZNF677	zinc finger protein 677
ZNF688	zinc finger protein 688
ZNF703	zinc finger protein 703
ZNF704	zinc finger protein 704
ZNF713	zinc finger protein 713
ZNF720	zinc finger protein 720
ZNF75D
ZNF763	zinc finger protein 763
ZNF780A	zinc finger protein 780A
ZNF791	zinc finger protein 791
ZNF792	zinc finger protein 792
ZNF827
ZNF84	zinc finger protein 84
ZNF846
ZNF853
ZNF862
ZNF880
ZSCAN18

## Sheet: Down by miR-34b
original id	description
SEPT11	septin 11
AASS	aminoadipate-semialdehyde synthase
ABCB1	ATP-binding cassette, sub-family B (MDR/TAP), member 1
ABHD3	abhydrolase domain containing 3
ACAT2	acetyl-Coenzyme A acetyltransferase 2 (acetoacetyl Coenzyme A thiolase)
ACD	adrenocortical dysplasia homolog (mouse)
ACTA2	actin, alpha 2, smooth muscle, aorta
ACTR1A	ARP1 actin-related protein 1 homolog A, centractin alpha (yeast)
ACYP1	acylphosphatase 1, erythrocyte (common) type
ADAM23	ADAM metallopeptidase domain 23
ADAM9	ADAM metallopeptidase domain 9 (meltrin gamma)
ADAMTS2	ADAM metallopeptidase with thrombospondin type 1 motif, 2
ADAMTS3	ADAM metallopeptidase with thrombospondin type 1 motif, 3
ADCK2	aarF domain containing kinase 2
ADCY3	adenylate cyclase 3
ADI1	acireductone dioxygenase 1
AGL	amylo-1, 6-glucosidase, 4-alpha-glucanotransferase (glycogen debranching enzyme, glycogen storage disease type III)
AGTRAP	angiotensin II receptor-associated protein
AK2	adenylate kinase 2
AK4
ANGEL1	angel homolog 1 (Drosophila)
ANGPTL2	angiopoietin-like 2
ANKH	ankylosis, progressive homolog (mouse)
ANKRD32	ankyrin repeat domain 32
ANKRD37	ankyrin repeat domain 37
ANKS1A	ankyrin repeat and sterile alpha motif domain containing 1A
ANLN	anillin, actin binding protein
ANP32E	acidic (leucine-rich) nuclear phosphoprotein 32 family, member E
ANXA4	annexin A4
ANXA5	annexin A5
AOX1	aldehyde oxidase 1
AP1S2	adaptor-related protein complex 1, sigma 2 subunit
AP2S1	adaptor-related protein complex 2, sigma 1 subunit
AP3M1	adaptor-related protein complex 3, mu 1 subunit
API5	apoptosis inhibitor 5
APOLD1	apolipoprotein L domain containing 1
APPL1
ARAP2
ARG2	arginase, type II
ARGLU1
ARHGAP1	Rho GTPase activating protein 1
ARHGAP11A	Rho GTPase activating protein 11A
ARHGAP28	Rho GTPase activating protein 28
ARHGAP29	Rho GTPase activating protein 29
ARHGAP42
ARHGAP6	Rho GTPase activating protein 6
ARL4A	ADP-ribosylation factor-like 4A
ARL5B	ADP-ribosylation factor-like 5B
ARL6IP6	ADP-ribosylation-like factor 6 interacting protein 6
ARSK	arylsulfatase family, member K
AS3MT	arsenic (+3 oxidation state) methyltransferase
ASAH1	N-acylsphingosine amidohydrolase (acid ceramidase) 1
ASCL1	achaete-scute complex-like 1 (Drosophila)
ASF1B	ASF1 anti-silencing function 1 homolog B (S. cerevisiae)
ASPH	aspartate beta-hydroxylase
ASPHD2	aspartate beta-hydroxylase domain containing 2
ASPM	asp (abnormal spindle) homolog, microcephaly associated (Drosophila)
ASXL1	additional sex combs like 1 (Drosophila)
ATAD2	ATPase family, AAA domain containing 2
ATAD5
ATF3	activating transcription factor 3
ATL2
ATP1B3	ATPase, Na+/K+ transporting, beta 3 polypeptide
ATP6V0A2	ATPase, H+ transporting, lysosomal V0 subunit a2
ATP6V0E1	ATPase, H+ transporting, lysosomal 9kDa, V0 subunit e1
ATPAF1	ATP synthase mitochondrial F1 complex assembly factor 1
ATPIF1	ATPase inhibitory factor 1
AURKA	aurora kinase A
AURKB	aurora kinase B
AZI2	5-azacytidine induced 2
B3GALTL	beta 1,3-galactosyltransferase-like
B4GALT1	UDP-Gal:betaGlcNAc beta 1,4- galactosyltransferase, polypeptide 1
B4GALT3	UDP-Gal:betaGlcNAc beta 1,4- galactosyltransferase, polypeptide 3
BACH2	BTB and CNC homology 1, basic leucine zipper transcription factor 2
BAG1	BCL2-associated athanogene
BARD1	BRCA1 associated RING domain 1
BCKDHB	branched chain keto acid dehydrogenase E1, beta polypeptide (maple syrup urine disease)
BCL2L12	BCL2-like 12 (proline rich)
BCLAF1	BCL2-associated transcription factor 1
BDH1	3-hydroxybutyrate dehydrogenase, type 1
BIRC5	baculoviral IAP repeat-containing 5 (survivin)
BLM	Bloom syndrome
BMP7	bone morphogenetic protein 7 (osteogenic protein 1)
BRCA1	breast cancer 1, early onset
BRCA2	breast cancer 2, early onset
BRE	brain and reproductive organ-expressed (TNFRSF1A modulator)
BRI3BP	BRI3 binding protein
BRIP1	BRCA1 interacting protein C-terminal helicase 1
BUB1	BUB1 budding uninhibited by benzimidazoles 1 homolog (yeast)
BUB1B	BUB1 budding uninhibited by benzimidazoles 1 homolog beta (yeast)
C10ORF119	chromosome 10 open reading frame 119
C10ORF78	chromosome 10 open reading frame 78
C10ORF84	chromosome 10 open reading frame 84
C11ORF82
C12ORF32	chromosome 12 open reading frame 32
C13ORF34	chromosome 13 open reading frame 34
C13ORF37
C14ORF106	chromosome 14 open reading frame 106
C14ORF179	chromosome 14 open reading frame 179
C15ORF39	chromosome 15 open reading frame 39
C15ORF42	chromosome 15 open reading frame 42
C16ORF5	chromosome 16 open reading frame 5
C16ORF61	chromosome 16 open reading frame 61
C16ORF75	chromosome 16 open reading frame 75
C18ORF10	chromosome 18 open reading frame 10
C1GALT1	core 1 synthase, glycoprotein-N-acetylgalactosamine 3-beta-galactosyltransferase, 1
C1ORF112	chromosome 1 open reading frame 112
C1ORF135	chromosome 1 open reading frame 135
C1ORF151	chromosome 1 open reading frame 151
C1ORF182	chromosome 1 open reading frame 182
C1ORF61	chromosome 1 open reading frame 61
C20ORF27	chromosome 20 open reading frame 27
C20ORF72	chromosome 20 open reading frame 72
C21ORF58	chromosome 21 open reading frame 58
C2ORF34	chromosome 2 open reading frame 34
C2ORF43	chromosome 2 open reading frame 43
C3ORF58	chromosome 3 open reading frame 58
C3ORF63	chromosome 3 open reading frame 63
C4ORF21	chromosome 4 open reading frame 21
C4ORF49
C5ORF34
C6ORF129	chromosome 6 open reading frame 129
C6ORF89	chromosome 6 open reading frame 89
C7ORF23	chromosome 7 open reading frame 23
C7ORF55
C8ORF33	chromosome 8 open reading frame 33
C8ORF55	chromosome 8 open reading frame 55
C9ORF100	chromosome 9 open reading frame 100
CABLES2	Cdk5 and Abl enzyme substrate 2
CALCB	calcitonin-related polypeptide, beta
CALD1	caldesmon 1
CALML4	calmodulin-like 4
CARD10	caspase recruitment domain family, member 10
CASC5	cancer susceptibility candidate 5
CASP8AP2	CASP8 associated protein 2
CBLN1	cerebellin 1 precursor
CBX5	chromobox homolog 5 (HP1 alpha homolog, Drosophila)
CCBL1	cysteine conjugate-beta lyase; cytoplasmic (glutamine transaminase K, kyneurenine aminotransferase)
CCDC21	coiled-coil domain containing 21
CCDC3	coiled-coil domain containing 3
CCDC50	coiled-coil domain containing 50
CCDC59	coiled-coil domain containing 59
CCNA2	cyclin A2
CCNB1	cyclin B1
CCNB2	cyclin B2
CCNE2	cyclin E2
CCNF	cyclin F
CCNG1	cyclin G1
CCNJ	cyclin J
CD276	CD276 molecule
CD58	CD58 molecule
CD99	CD99 molecule
CDC14B	CDC14 cell division cycle 14 homolog B (S. cerevisiae)
CDC20	CDC20 cell division cycle 20 homolog (S. cerevisiae)
CDC23	CDC23 (cell division cycle 23, yeast, homolog)
CDC25A	cell division cycle 25A
CDC25C	cell division cycle 25C
CDC45
CDC6	CDC6 cell division cycle 6 homolog (S. cerevisiae)
CDC7	CDC7 cell division cycle 7 (S. cerevisiae)
CDCA2	cell division cycle associated 2
CDCA3	cell division cycle associated 3
CDCA5	cell division cycle associated 5
CDCA7	cell division cycle associated 7
CDCA7L	cell division cycle associated 7-like
CDCA8	cell division cycle associated 8
CDH11	cadherin 11, type 2, OB-cadherin (osteoblast)
CDK1
CDK19
CDK2	cyclin-dependent kinase 2
CDK4	cyclin-dependent kinase 4
CDKN1A	cyclin-dependent kinase inhibitor 1A (p21, Cip1)
CDKN3	cyclin-dependent kinase inhibitor 3 (CDK2-associated dual specificity phosphatase)
CDT1	chromatin licensing and DNA replication factor 1
CENPA	centromere protein A
CENPE	centromere protein E, 312kDa
CENPF	centromere protein F, 350/400ka (mitosin)
CENPH	centromere protein H
CENPI	centromere protein I
CENPK	centromere protein K
CENPL	centromere protein L
CENPM	centromere protein M
CENPN	centromere protein N
CENPO	centromere protein O
CENPQ	centromere protein Q
CENPW
CEP152	centrosomal protein 152kDa
CEP55	centrosomal protein 55kDa
CEP72	centrosomal protein 72kDa
CHAC2	ChaC, cation transport regulator homolog 2 (E. coli)
CHAF1A	chromatin assembly factor 1, subunit A (p150)
CHAF1B	chromatin assembly factor 1, subunit B (p60)
CHEK1	CHK1 checkpoint homolog (S. pombe)
CHEK2	CHK2 checkpoint homolog (S. pombe)
CHMP2B	chromatin modifying protein 2B
CHRAC1	chromatin accessibility complex 1
CHST14
CIB2	calcium and integrin binding family member 2
CKAP2L	cytoskeleton associated protein 2-like
CLCC1	chloride channel CLIC-like 1
CLSPN	claspin homolog (Xenopus laevis)
CMTM7	CKLF-like MARVEL transmembrane domain containing 7
CNIH4	cornichon homolog 4 (Drosophila)
CNPY3
CNTNAP2	contactin associated protein-like 2
COL18A1	collagen, type XVIII, alpha 1
COMMD4	COMM domain containing 4
COPS7B	COP9 constitutive photomorphogenic homolog subunit 7B (Arabidopsis)
CRIP2	cysteine-rich protein 2
CRISPLD2	cysteine-rich secretory protein LCCL domain containing 2
CRNDE
CTSB	cathepsin B
CTSC	cathepsin C
CTSL2	cathepsin L2
CXCL12	chemokine (C-X-C motif) ligand 12 (stromal cell-derived factor 1)
CXCR7	chemokine (C-X-C motif) receptor 7
CYB5B	cytochrome b5 type B (outer mitochondrial membrane)
CYB5R3	cytochrome b5 reductase 3
CYB5RL
DAXX	death-associated protein 6
DBI	diazepam binding inhibitor (GABA receptor modulator, acyl-Coenzyme A binding protein)
DCLRE1A	DNA cross-link repair 1A (PSO2 homolog, S. cerevisiae)
DDX11	DEAD/H (Asp-Glu-Ala-Asp/His) box polypeptide 11 (CHL1-like helicase homolog, S. cerevisiae)
DEPDC1	DEP domain containing 1
DEPDC1B	DEP domain containing 1B
DGCR14	DiGeorge syndrome critical region gene 14
DHCR24	24-dehydrocholesterol reductase
DHCR7	7-dehydrocholesterol reductase
DHFR	dihydrofolate reductase
DHRS13	dehydrogenase/reductase (SDR family) member 13
DHRS7B	dehydrogenase/reductase (SDR family) member 7B
DHTKD1	dehydrogenase E1 and transketolase domain containing 1
DHX37	DEAH (Asp-Glu-Ala-His) box polypeptide 37
DIAPH1	diaphanous homolog 1 (Drosophila)
DIAPH3	diaphanous homolog 3 (Drosophila)
DKK3	dickkopf homolog 3 (Xenopus laevis)
DLEU1	deleted in lymphocytic leukemia, 1
DLEU2	deleted in lymphocytic leukemia, 2
DLGAP5
DNA2
DNAJB12	DnaJ (Hsp40) homolog, subfamily B, member 12
DNAJC10	DnaJ (Hsp40) homolog, subfamily C, member 10
DNAJC18	DnaJ (Hsp40) homolog, subfamily C, member 18
DNASE2	deoxyribonuclease II, lysosomal
DONSON	downstream neighbor of SON
DPF1	D4, zinc and double PHD fingers family 1
DPM3	dolichyl-phosphate mannosyltransferase polypeptide 3
DPY19L1	dpy-19-like 1 (C. elegans)
DPY19L4	dpy-19-like 4 (C. elegans)
DSCC1
DSE
DSEL
DSN1
DTL	denticleless homolog (Drosophila)
DTYMK	deoxythymidylate kinase (thymidylate kinase)
DUT	dUTP pyrophosphatase
DYNLT3	dynein, light chain, Tctex-type 3
E2F1	E2F transcription factor 1
E2F2	E2F transcription factor 2
E2F7	E2F transcription factor 7
E2F8	E2F transcription factor 8
EBP	emopamil binding protein (sterol isomerase)
ECT2	epithelial cell transforming sequence 2 oncogene
EED	embryonic ectoderm development
EFHD2	EF-hand domain family, member D2
EGLN3	egl nine homolog 3 (C. elegans)
EHD4	EH-domain containing 4
EIF2AK1	eukaryotic translation initiation factor 2-alpha kinase 1
EIF2AK4	eukaryotic translation initiation factor 2 alpha kinase 4
EIF3A
ELAVL1	ELAV (embryonic lethal, abnormal vision, Drosophila)-like 1 (Hu antigen R)
EMP2	epithelial membrane protein 2
ENDOG	endonuclease G
EPR1	effector cell peptidase receptor 1
ERCC1	excision repair cross-complementing rodent repair deficiency, complementation group 1 (includes overlapping antisense sequence)
ERCC6L
ERI1
ERLIN1
ESCO2	establishment of cohesion 1 homolog 2 (S. cerevisiae)
ESD	esterase D/formylglutathione hydrolase
ESPL1	extra spindle poles like 1 (S. cerevisiae)
ETS1	v-ets erythroblastosis virus E26 oncogene homolog 1 (avian)
EXO1	exonuclease 1
EZH2	enhancer of zeste homolog 2 (Drosophila)
FAM105B	family with sequence similarity 105, member B
FAM111B	family with sequence similarity 111, member B
FAM119A	family with sequence similarity 119, member A
FAM122B	family with sequence similarity 122B
FAM126A	family with sequence similarity 126, member A
FAM173B
FAM20B	family with sequence similarity 20, member B
FAM43B	family with sequence similarity 43, member B
FAM45A	family with sequence similarity 45, member A
FAM54A	family with sequence similarity 54, member A
FAM59B	family with sequence similarity 59, member B
FAM60A	family with sequence similarity 60, member A
FAM64A	family with sequence similarity 64, member A
FAM69A	family with sequence similarity 69, member A
FAM83D	family with sequence similarity 83, member D
FANCA	Fanconi anemia, complementation group A
FANCB	Fanconi anemia, complementation group B
FANCC	Fanconi anemia, complementation group C
FANCD2	Fanconi anemia, complementation group D2
FANCE	Fanconi anemia, complementation group E
FANCG	Fanconi anemia, complementation group G
FANCI	Fanconi anemia, complementation group I
FBLN1	fibulin 1
FBXL7	F-box and leucine-rich repeat protein 7
FBXO5	F-box protein 5
FEN1	flap structure-specific endonuclease 1
FH	fumarate hydratase
FHL2	four and a half LIM domains 2
FIGNL1	fidgetin-like 1
FKBP1A	FK506 binding protein 1A, 12kDa
FKBP7	FK506 binding protein 7
FLJ39653	-
FLJ45482	-
FOXJ2	forkhead box J2
FOXM1	forkhead box M1
FSTL1	follistatin-like 1
FUS	fusion (involved in t(12;16) in malignant liposarcoma)
FUT10	fucosyltransferase 10 (alpha (1,3) fucosyltransferase)
FUT4	fucosyltransferase 4 (alpha (1,3) fucosyltransferase, myeloid-specific)
FUT9	fucosyltransferase 9 (alpha (1,3) fucosyltransferase)
G2E3
G3BP1
GABRQ	gamma-aminobutyric acid (GABA) receptor, theta
GAS1	growth arrest-specific 1
GAS2L1	growth arrest-specific 2 like 1
GAS2L3	growth arrest-specific 2 like 3
GAS5	growth arrest-specific 5
GATC
GCLM	glutamate-cysteine ligase, modifier subunit
GEMIN8
GFRA3	GDNF family receptor alpha 3
GINS1	GINS complex subunit 1 (Psf1 homolog)
GINS2	GINS complex subunit 2 (Psf2 homolog)
GINS3	GINS complex subunit 3 (Psf3 homolog)
GINS4	GINS complex subunit 4 (Sld5 homolog)
GJC1	gap junction protein, chi 1, 31.9kDa (connexin 31.9)
GK	glycerol kinase
GLT8D1	glycosyltransferase 8 domain containing 1
GLUD1	glutamate dehydrogenase 1
GLUD2	glutamate dehydrogenase 2
GMNN	geminin, DNA replication inhibitor
GNAS-AS
GNB5	guanine nucleotide binding protein (G protein), beta 5
GNPDA1	glucosamine-6-phosphate deaminase 1
GOLIM4
GPC1	glypican 1
GPC6	glypican 6
GPD2	glycerol-3-phosphate dehydrogenase 2 (mitochondrial)
GPM6B	glycoprotein M6B
GPR107	G protein-coupled receptor 107
GPR56	G protein-coupled receptor 56
GPSM2	G-protein signalling modulator 2 (AGS3-like, C. elegans)
GPX3	glutathione peroxidase 3 (plasma)
GRIK3	glutamate receptor, ionotropic, kainate 3
GRN	granulin
GSG2	germ cell associated 2 (haspin)
GTF3C2	general transcription factor IIIC, polypeptide 2, beta 110kDa
GTSE1	G-2 and S-phase expressed 1
GXYLT1
GXYLT2
H2AFX	H2A histone family, member X
HACE1	HECT domain and ankyrin repeat containing, E3 ubiquitin protein ligase 1
HADH	hydroxyacyl-Coenzyme A dehydrogenase
HAMP	hepcidin antimicrobial peptide
HAUS1
HAUS2
HAUS4
HCN3	hyperpolarization activated cyclic nucleotide-gated potassium channel 3
HDAC1	histone deacetylase 1
HEATR1	HEAT repeat containing 1
HECA	headcase homolog (Drosophila)
HECTD2	HECT domain containing 2
HELLS	helicase, lymphoid-specific
HES1	hairy and enhancer of split 1, (Drosophila)
HGF	hepatocyte growth factor (hepapoietin A; scatter factor)
HHEX	homeobox, hematopoietically expressed
HIST1H4J	histone cluster 1, H4j
HJURP
HK2	hexokinase 2
HMGCS1	3-hydroxy-3-methylglutaryl-Coenzyme A synthase 1 (soluble)
HMGN4	high mobility group nucleosomal binding domain 4
HMGN5
HMMR	hyaluronan-mediated motility receptor (RHAMM)
HN1	hematological and neurological expressed 1
HN1L
HOOK1	hook homolog 1 (Drosophila)
HP1BP3	heterochromatin protein 1, binding protein 3
HPCAL1	hippocalcin-like 1
HPDL
HPS3	Hermansky-Pudlak syndrome 3
HRASLS	HRAS-like suppressor
HSD17B10
HSD17B6	hydroxysteroid (17-beta) dehydrogenase 6
HSPA2	heat shock 70kDa protein 2
HSPB11
HTR1E	5-hydroxytryptamine (serotonin) receptor 1E
HUNK	hormonally upregulated Neu-associated kinase
ICMT	isoprenylcysteine carboxyl methyltransferase
ID4	inhibitor of DNA binding 4, dominant negative helix-loop-helix protein
IDH1	isocitrate dehydrogenase 1 (NADP+), soluble
IER5	immediate early response 5
IGFBP5	insulin-like growth factor binding protein 5
IL2RB	interleukin 2 receptor, beta
IMMP1L	IMP1 inner mitochondrial membrane peptidase-like (S. cerevisiae)
IMPAD1	inositol monophosphatase domain containing 1
INF2
ING3	inhibitor of growth family, member 3
INSIG1	insulin induced gene 1
IQGAP3	IQ motif containing GTPase activating protein 3
IRX3	iroquois homeobox protein 3
ITGA4	integrin, alpha 4 (antigen CD49D, alpha 4 subunit of VLA-4 receptor)
ITGB3BP	integrin beta 3 binding protein (beta3-endonexin)
JAM3	junctional adhesion molecule 3
KANK2
KCNG3	potassium voltage-gated channel, subfamily G, member 3
KCNQ5	potassium voltage-gated channel, KQT-like subfamily, member 5
KCTD9	potassium channel tetramerisation domain containing 9
KDELC2	KDEL (Lys-Asp-Glu-Leu) containing 2
KDELR3	KDEL (Lys-Asp-Glu-Leu) endoplasmic reticulum protein retention receptor 3
KIAA0101	KIAA0101
KIAA0114	KIAA0114
KIAA0196	KIAA0196
KIAA0494	KIAA0494
KIAA1274	KIAA1274
KIAA1524	KIAA1524
KIAA1715	KIAA1715
KIF11	kinesin family member 11
KIF14	kinesin family member 14
KIF15	kinesin family member 15
KIF18A	kinesin family member 18A
KIF18B
KIF20A	kinesin family member 20A
KIF23	kinesin family member 23
KIF2C	kinesin family member 2C
KIF4A	kinesin family member 4A
KIFC1	kinesin family member C1
KLF15	Kruppel-like factor 15
KLHDC8A	kelch domain containing 8A
KLHL23	kelch-like 23 (Drosophila)
KNTC1	kinetochore associated 1
LAPTM4B	lysosomal associated protein transmembrane 4 beta
LARP1B
LARP6	La ribonucleoprotein domain family, member 6
LASS2	LAG1 homolog, ceramide synthase 2 (S. cerevisiae)
LAYN	layilin
LDHA	lactate dehydrogenase A
LDLR	low density lipoprotein receptor (familial hypercholesterolemia)
LEF1	lymphoid enhancer-binding factor 1
LHFPL2	lipoma HMGIC fusion partner-like 2
LIG1	ligase I, DNA, ATP-dependent
LITAF	lipopolysaccharide-induced TNF factor
LIX1	Lix1 homolog (mouse)
LMAN2L	lectin, mannose-binding 2-like
LMO3	LIM domain only 3 (rhombotin-like 2)
LOC100127983
LOC100128191
LOC100132884
LOC100287039
LOC100287616
LOC100288693
LOC100505842
LOC100505935
LOC100506517
LOC100506638
LOC100506676
LOC100506761
LOC100507448
LOC202781	-
LOC254559	-
LOC283481	-
LOC346887	-
LOC401321	-
LOC401397	-
LOC441046	-
LOC641518	-
LOC644538	-
LOC646903	-
LONRF1	LON peptidase N-terminal domain and ring finger 1
LPP	LIM domain containing preferred translocation partner in lipoma
LSM10	LSM10, U7 small nuclear RNA associated
LSM2	LSM2 homolog, U6 small nuclear RNA associated (S. cerevisiae)
LSS	lanosterol synthase (2,3-oxidosqualene-lanosterol cyclase)
LTA4H	leukotriene A4 hydrolase
LY6E	lymphocyte antigen 6 complex, locus E
MAD2L1	MAD2 mitotic arrest deficient-like 1 (yeast)
MAD2L2	MAD2 mitotic arrest deficient-like 2 (yeast)
MAK16
MANEA	mannosidase, endo-alpha
MAPK1IP1L
MASTL	microtubule associated serine/threonine kinase-like
MAT2A	methionine adenosyltransferase II, alpha
MATR3	matrin 3
MCAM	melanoma cell adhesion molecule
MCHR1	melanin-concentrating hormone receptor 1
MCM10	MCM10 minichromosome maintenance deficient 10 (S. cerevisiae)
MCM2	MCM2 minichromosome maintenance deficient 2, mitotin (S. cerevisiae)
MCM3	MCM3 minichromosome maintenance deficient 3 (S. cerevisiae)
MCM4	MCM4 minichromosome maintenance deficient 4 (S. cerevisiae)
MCM5	MCM5 minichromosome maintenance deficient 5, cell division cycle 46 (S. cerevisiae)
MCM6	MCM6 minichromosome maintenance deficient 6 (MIS5 homolog, S. pombe) (S. cerevisiae)
MCM7	MCM7 minichromosome maintenance deficient 7 (S. cerevisiae)
MCM8	MCM8 minichromosome maintenance deficient 8 (S. cerevisiae)
MEA1	male-enhanced antigen 1
MELK	maternal embryonic leucine zipper kinase
MESP1	mesoderm posterior 1 homolog (mouse)
METTL10
METTL4	methyltransferase like 4
METTL9	methyltransferase like 9
MFAP2	microfibrillar-associated protein 2
MID1	midline 1 (Opitz/BBB syndrome)
MIR17HG
MKI67	antigen identified by monoclonal antibody Ki-67
MLF1IP	MLF1 interacting protein
MLH1	mutL homolog 1, colon cancer, nonpolyposis type 2 (E. coli)
MMAB	methylmalonic aciduria (cobalamin deficiency) cblB type
MMD	monocyte to macrophage differentiation-associated
MND1	meiotic nuclear divisions 1 homolog (S. cerevisiae)
MNS1	meiosis-specific nuclear structural 1
MORC4	MORC family CW-type zinc finger 4
MPHOSPH6	M-phase phosphoprotein 6
MPHOSPH9	M-phase phosphoprotein 9
MRPL47	mitochondrial ribosomal protein L47
MRPS12	mitochondrial ribosomal protein S12
MRS2
MSH6	mutS homolog 6 (E. coli)
MST4
MSX2	msh homeobox homolog 2 (Drosophila)
MTCH2	mitochondrial carrier homolog 2 (C. elegans)
MTHFD2L	methylenetetrahydrofolate dehydrogenase (NADP+ dependent) 2-like
MTMR6	myotubularin related protein 6
MTUS2
MURC
MUTED	muted homolog (mouse)
MXD3	MAX dimerization protein 3
MYADM	myeloid-associated differentiation marker
MYB	v-myb myeloblastosis viral oncogene homolog (avian)
MYBL1	v-myb myeloblastosis viral oncogene homolog (avian)-like 1
MYBL2	v-myb myeloblastosis viral oncogene homolog (avian)-like 2
MYO19
MYO6	myosin VI
N4BP2L1
NAA50
NAB1	NGFI-A binding protein 1 (EGR1 binding protein 1)
NAF1
NASP	nuclear autoantigenic sperm protein (histone-binding)
NCAPD2	non-SMC condensin I complex, subunit D2
NCAPD3	non-SMC condensin II complex, subunit D3
NCAPG	non-SMC condensin I complex, subunit G
NCAPG2	non-SMC condensin II complex, subunit G2
NCAPH	non-SMC condensin I complex, subunit H
NDC80
NDE1	nudE nuclear distribution gene E homolog 1 (A. nidulans)
NDUFC1	NADH dehydrogenase (ubiquinone) 1, subcomplex unknown, 1, 6kDa
NEDD1	neural precursor cell expressed, developmentally down-regulated 1
NEDD4	neural precursor cell expressed, developmentally down-regulated 4
NEIL3	nei endonuclease VIII-like 3 (E. coli)
NEK2	NIMA (never in mitosis gene a)-related kinase 2
NENF	neuron derived neurotrophic factor
NEURL1B
NEXN	nexilin (F actin binding protein)
NFATC3	nuclear factor of activated T-cells, cytoplasmic, calcineurin-dependent 3
NFIB	nuclear factor I/B
NINJ1	ninjurin 1
NIPA2	non imprinted in Prader-Willi/Angelman syndrome 2
NOC3L	nucleolar complex associated 3 homolog (S. cerevisiae)
NOL10	nucleolar protein 10
NPTX2	neuronal pentraxin II
NRG3	neuregulin 3
NRGN	neurogranin (protein kinase C substrate, RC3)
NRM	nurim (nuclear envelope membrane protein)
NRN1	neuritin 1
NRP2	neuropilin 2
NUCKS1	nuclear casein kinase and cyclin-dependent kinase substrate 1
NUDT5	nudix (nucleoside diphosphate linked moiety X)-type motif 5
NUF2
NUP210	nucleoporin 210kDa
NUP50	nucleoporin 50kDa
NUP98	nucleoporin 98kDa
NUPL1	nucleoporin like 1
NUSAP1	nucleolar and spindle associated protein 1
NUTF2	nuclear transport factor 2
NXPH2	neurexophilin 2
OAF	OAF homolog (Drosophila)
OAS1	2',5'-oligoadenylate synthetase 1, 40/46kDa
OGDH	oxoglutarate (alpha-ketoglutarate) dehydrogenase (lipoamide)
OIP5	Opa interacting protein 5
OPN3	opsin 3 (encephalopsin, panopsin)
ORC1
P4HA1	procollagen-proline, 2-oxoglutarate 4-dioxygenase (proline 4-hydroxylase), alpha polypeptide I
P4HA2	procollagen-proline, 2-oxoglutarate 4-dioxygenase (proline 4-hydroxylase), alpha polypeptide II
PABPC4L	poly(A) binding protein, cytoplasmic 4-like
PARN	poly(A)-specific ribonuclease (deadenylation nuclease)
PARVA	parvin, alpha
PASK	PAS domain containing serine/threonine kinase
PBK	PDZ binding kinase
PCNA	proliferating cell nuclear antigen
PCNP	PEST proteolytic signal containing nuclear protein
PDCD2	programmed cell death 2
PDE8A	phosphodiesterase 8A
PDK1	pyruvate dehydrogenase kinase, isozyme 1
PDLIM1	PDZ and LIM domain 1 (elfin)
PDLIM7	PDZ and LIM domain 7 (enigma)
PELI2	pellino homolog 2 (Drosophila)
PFKFB3	6-phosphofructo-2-kinase/fructose-2,6-biphosphatase 3
PGM2	phosphoglucomutase 2
PGRMC2	progesterone receptor membrane component 2
PHF10	PHD finger protein 10
PHF19	PHD finger protein 19
PHGDH	phosphoglycerate dehydrogenase
PHTF2	putative homeodomain transcription factor 2
PI4K2B	phosphatidylinositol 4-kinase type 2 beta
PIAS2	protein inhibitor of activated STAT, 2
PIF1
PIGC	phosphatidylinositol glycan anchor biosynthesis, class C
PIK3C2A	phosphoinositide-3-kinase, class 2, alpha polypeptide
PIM1	pim-1 oncogene
PIPOX	pipecolic acid oxidase
PKMYT1	protein kinase, membrane associated tyrosine/threonine 1
PLA2G12A	phospholipase A2, group XIIA
PLBD1
PLEKHA1	pleckstrin homology domain containing, family A (phosphoinositide binding specific) member 1
PLIN2
PLK1	polo-like kinase 1 (Drosophila)
PLK4	polo-like kinase 4 (Drosophila)
PLOD2	procollagen-lysine, 2-oxoglutarate 5-dioxygenase 2
PLS1	plastin 1 (I isoform)
PLSCR1	phospholipid scramblase 1
POC1A
POLA2	polymerase (DNA directed), alpha 2 (70kD subunit)
POLD1	polymerase (DNA directed), delta 1, catalytic subunit 125kDa
POLD3	polymerase (DNA-directed), delta 3, accessory subunit
POLE	polymerase (DNA directed), epsilon
POLE2	polymerase (DNA directed), epsilon 2 (p59 subunit)
POLQ	polymerase (DNA directed), theta
POLR3K	polymerase (RNA) III (DNA directed) polypeptide K, 12.3 kDa
PPA2	pyrophosphatase (inorganic) 2
PPID	peptidylprolyl isomerase D (cyclophilin D)
PPIG	peptidylprolyl isomerase G (cyclophilin G)
PPP1R11	protein phosphatase 1, regulatory (inhibitor) subunit 11
PPP2R2B	protein phosphatase 2 (formerly 2A), regulatory subunit B (PR 52), beta isoform
PPPDE1
PPPDE2
PRC1	protein regulator of cytokinesis 1
PRELID2
PRIM1	primase, polypeptide 1, 49kDa
PRIMA1	proline rich membrane anchor 1
PRKRIR	protein-kinase, interferon-inducible double stranded RNA dependent inhibitor, repressor of (P58 repressor)
PRPS2	phosphoribosyl pyrophosphate synthetase 2
PRR11	proline rich 11
PSMC3IP	PSMC3 interacting protein
PSME3	proteasome (prosome, macropain) activator subunit 3 (PA28 gamma; Ki)
PSRC1	proline/serine-rich coiled-coil 1
PTP4A2	protein tyrosine phosphatase type IVA, member 2
PTPLB	protein tyrosine phosphatase-like (proline instead of catalytic arginine), member b
PTPN11	protein tyrosine phosphatase, non-receptor type 11 (Noonan syndrome 1)
PTPRG	protein tyrosine phosphatase, receptor type, G
PTTG1	pituitary tumor-transforming 1
PTTG3P
PVRL3	poliovirus receptor-related 3
PXMP2	peroxisomal membrane protein 2, 22kDa
QKI	quaking homolog, KH domain RNA binding (mouse)
RAB27A	RAB27A, member RAS oncogene family
RAB31	RAB31, member RAS oncogene family
RAB38	RAB38, member RAS oncogene family
RAB3C	RAB3C, member RAS oncogene family
RAB7L1	RAB7, member RAS oncogene family-like 1
RAD51	RAD51 homolog (RecA homolog, E. coli) (S. cerevisiae)
RAD51AP1	RAD51 associated protein 1
RAD51L3	RAD51-like 3 (S. cerevisiae)
RAD54B	RAD54 homolog B (S. cerevisiae)
RAD54L	RAD54-like (S. cerevisiae)
RAD54L2	RAD54-like 2 (S. cerevisiae)
RALA	v-ral simian leukemia viral oncogene homolog A (ras related)
RBBP4	retinoblastoma binding protein 4
RBL1	retinoblastoma-like 1 (p107)
RBM15	RNA binding motif protein 15
RBMS2	RNA binding motif, single stranded interacting protein 2
RBPMS	RNA binding protein with multiple splicing
RBPMS2	RNA binding protein with multiple splicing 2
RDM1	RAD52 motif 1
RDX	radixin
RECQL	RecQ protein-like (DNA helicase Q1-like)
RECQL4	RecQ protein-like 4
REEP5	receptor accessory protein 5
RFC2	replication factor C (activator 1) 2, 40kDa
RFC4	replication factor C (activator 1) 4, 37kDa
RFC5	replication factor C (activator 1) 5, 36.5kDa
RFXAP	regulatory factor X-associated protein
RGS4	regulator of G-protein signalling 4
RHOU	ras homolog gene family, member U
RIBC2	RIB43A domain with coiled-coils 2
RIPK2	receptor-interacting serine-threonine kinase 2
RMI1	RMI1, RecQ mediated genome instability 1, homolog (S. cerevisiae)
RNASEH1	ribonuclease H1
RNASEH2A	ribonuclease H2, subunit A
RNASEH2B	ribonuclease H2, subunit B
RNASEH2C	ribonuclease H2, subunit C
RPIA	ribose 5-phosphate isomerase A (ribose 5-phosphate epimerase)
RPL27A	ribosomal protein L27a
RPL39L	ribosomal protein L39-like
RPS15A	ribosomal protein S15a
RPS28	ribosomal protein S28
RQCD1	RCD1 required for cell differentiation1 homolog (S. pombe)
RRAS2	related RAS viral (r-ras) oncogene homolog 2
RRM1	ribonucleotide reductase M1 polypeptide
RRM2	ribonucleotide reductase M2 polypeptide
RTKN2
RTN4IP1	reticulon 4 interacting protein 1
S1PR3
SAC3D1	SAC3 domain containing 1
SCAMP2	secretory carrier membrane protein 2
SCARA3	scavenger receptor class A, member 3
SCCPDH	saccharopine dehydrogenase (putative)
SCD	stearoyl-CoA desaturase (delta-9-desaturase)
SCLT1	sodium channel and clathrin linker 1
SDC1	syndecan 1
SDC2	syndecan 2 (heparan sulfate proteoglycan 1, cell surface-associated, fibroglycan)
SEC24A	SEC24 related gene family, member A (S. cerevisiae)
SERPINH1	serpin peptidase inhibitor, clade H (heat shock protein 47), member 1, (collagen binding protein 1)
SESTD1	SEC14 and spectrin domains 1
SETD8	SET domain containing (lysine methyltransferase) 8
SETMAR	SET domain and mariner transposase fusion gene
SFMBT1	Scm-like with four mbt domains 1
SGOL1	shugoshin-like 1 (S. pombe)
SGOL2	shugoshin-like 2 (S. pombe)
SGPP1	sphingosine-1-phosphate phosphatase 1
SH3GL1	SH3-domain GRB2-like 1
SHCBP1	SHC SH2-domain binding protein 1
SHMT1	serine hydroxymethyltransferase 1 (soluble)
SHMT2	serine hydroxymethyltransferase 2 (mitochondrial)
SHROOM1	shroom family member 1
SIVA1
SKA1
SKA3
SKP1
SKP2	S-phase kinase-associated protein 2 (p45)
SLC17A5	solute carrier family 17 (anion/sugar transporter), member 5
SLC18A1	solute carrier family 18 (vesicular monoamine), member 1
SLC18A3	solute carrier family 18 (vesicular acetylcholine), member 3
SLC19A2	solute carrier family 19 (thiamine transporter), member 2
SLC1A4	solute carrier family 1 (glutamate/neutral amino acid transporter), member 4
SLC25A13	solute carrier family 25, member 13 (citrin)
SLC26A2	solute carrier family 26 (sulfate transporter), member 2
SLC29A1	solute carrier family 29 (nucleoside transporters), member 1
SLC2A1	solute carrier family 2 (facilitated glucose transporter), member 1
SLC2A4RG	SLC2A4 regulator
SLC30A6	solute carrier family 30 (zinc transporter), member 6
SLC35A4	solute carrier family 35, member A4
SLC39A8	solute carrier family 39 (zinc transporter), member 8
SLC39A9	solute carrier family 39 (zinc transporter), member 9
SLC44A1	solute carrier family 44, member 1
SLC4A8	solute carrier family 4, sodium bicarbonate cotransporter, member 8
SLC5A3	solute carrier family 5 (inositol transporters), member 3
SLC7A6OS	solute carrier family 7, member 6 opposite strand
SLC8A1	solute carrier family 8 (sodium/calcium exchanger), member 1
SLC9A3R1	solute carrier family 9 (sodium/hydrogen exchanger), member 3 regulator 1
SLCO4A1	solute carrier organic anion transporter family, member 4A1
SLIT2	slit homolog 2 (Drosophila)
SLK	STE20-like kinase (yeast)
SMARCE1	SWI/SNF related, matrix associated, actin dependent regulator of chromatin, subfamily e, member 1
SMC2	structural maintenance of chromosomes 2
SMC4	structural maintenance of chromosomes 4
SMCR7L	Smith-Magenis syndrome chromosome region, candidate 7-like
SMTNL2	smoothelin-like 2
SNAI2	snail homolog 2 (Drosophila)
SNCA	synuclein, alpha (non A4 component of amyloid precursor)
SNF8	SNF8, ESCRT-II complex subunit, homolog (S. cerevisiae)
SNHG12
SNHG3	small nucleolar RNA host gene (non-protein coding) 3
SNHG7	small nucleolar RNA host gene (non-protein coding) 7
SNHG9	small nucleolar RNA host gene (non-protein coding) 9
SNRNP25
SNRPA1	small nuclear ribonucleoprotein polypeptide A'
SNRPD1	small nuclear ribonucleoprotein D1 polypeptide 16kDa
SNX1	sorting nexin 1
SNX12	sorting nexin 12
SNX17	sorting nexin 17
SNX25	sorting nexin 25
SOAT1	sterol O-acyltransferase (acyl-Coenzyme A: cholesterol acyltransferase) 1
SOX2	SRY (sex determining region Y)-box 2
SP3	Sp3 transcription factor
SPAG5	sperm associated antigen 5
SPARC	secreted protein, acidic, cysteine-rich (osteonectin)
SPC24
SPC25
SPG20	spastic paraplegia 20, spartin (Troyer syndrome)
SPOCK3	sparc/osteonectin, cwcv and kazal-like domains proteoglycan (testican) 3
SPSB4	splA/ryanodine receptor domain and SOCS box containing 4
SQLE	squalene epoxidase
SRGAP2	SLIT-ROBO Rho GTPase activating protein 2
SRI	sorcin
SST	somatostatin
ST6GALNAC3	ST6 (alpha-N-acetyl-neuraminyl-2,3-beta-galactosyl-1,3)-N-acetylgalactosaminide alpha-2,6-sialyltransferase 3
STIL	SCL/TAL1 interrupting locus
STIP1	stress-induced-phosphoprotein 1 (Hsp70/Hsp90-organizing protein)
STK40	serine/threonine kinase 40
STMN1	stathmin 1/oncoprotein 18
STT3B	STT3, subunit of the oligosaccharyltransferase complex, homolog B (S. cerevisiae)
SUDS3	suppressor of defective silencing 3 homolog (S. cerevisiae)
SULF2	sulfatase 2
SURF4	surfeit 4
SUV39H2	suppressor of variegation 3-9 homolog 2 (Drosophila)
SVIP
SWAP70	-
SYNCRIP	synaptotagmin binding, cytoplasmic RNA interacting protein
SYT4	synaptotagmin IV
TACC1	transforming, acidic coiled-coil containing protein 1
TACC3	transforming, acidic coiled-coil containing protein 3
TAF3	TAF3 RNA polymerase II, TATA box binding protein (TBP)-associated factor, 140kDa
TAGLN2	transgelin 2
TBC1D1	TBC1 (tre-2/USP6, BUB2, cdc16) domain family, member 1
TCEB2	transcription elongation factor B (SIII), polypeptide 2 (18kDa, elongin B)
TCF19	transcription factor 19 (SC1)
TEAD2	TEA domain family member 2
TEX10	testis expressed sequence 10
TEX15	testis expressed sequence 15
TEX19
TFDP1	transcription factor Dp-1
TIFA	-
TIMELESS	timeless homolog (Drosophila)
TJP2	tight junction protein 2 (zona occludens 2)
TK1	thymidine kinase 1, soluble
TM7SF3	transmembrane 7 superfamily member 3
TMED2	transmembrane emp24 domain trafficking protein 2
TMED4	transmembrane emp24 protein transport domain containing 4
TMEFF1	transmembrane protein with EGF-like and two follistatin-like domains 1
TMEM109	transmembrane protein 109
TMEM117	transmembrane protein 117
TMEM133	transmembrane protein 133
TMEM167A
TMEM180	transmembrane protein 180
TMEM20	transmembrane protein 20
TMEM200A
TMEM201
TMEM38B	transmembrane protein 38B
TMEM41A	transmembrane protein 41A
TMEM45A	transmembrane protein 45A
TMEM48	transmembrane protein 48
TMEM51	transmembrane protein 51
TMEM68	transmembrane protein 68
TMEM70	transmembrane protein 70
TMEM97	transmembrane protein 97
TMEM98	transmembrane protein 98
TMPO	thymopoietin
TMSB15A
TMTC3	transmembrane and tetratricopeptide repeat containing 3
TNFAIP8	tumor necrosis factor, alpha-induced protein 8
TNFRSF10B	tumor necrosis factor receptor superfamily, member 10b
TNFRSF12A	tumor necrosis factor receptor superfamily, member 12A
TNNT2	troponin T type 2 (cardiac)
TOP2A	topoisomerase (DNA) II alpha 170kDa
TOR1AIP1	torsin A interacting protein 1
TPD52	tumor protein D52
TPX2	TPX2, microtubule-associated, homolog (Xenopus laevis)
TRAF4	TNF receptor-associated factor 4
TRAM1	translocation associated membrane protein 1
TRAM2	translocation associated membrane protein 2
TRIB3	tribbles homolog 3 (Drosophila)
TRIM14	tripartite motif-containing 14
TRIM29	tripartite motif-containing 29
TRIM5	tripartite motif-containing 5
TRIM55	tripartite motif-containing 55
TRIM56	tripartite motif-containing 56
TRMT5	TRM5 tRNA methyltransferase 5 homolog (S. cerevisiae)
TROAP	trophinin associated protein (tastin)
TSEN15
TSEN54	tRNA splicing endonuclease 54 homolog (S. cerevisiae)
TSPAN14	tetraspanin 14
TSPAN4	tetraspanin 4
TTC33	tetratricopeptide repeat domain 33
TTK	TTK protein kinase
TTLL4	tubulin tyrosine ligase-like family, member 4
TUFT1	tuftelin 1
TXNDC9	thioredoxin domain containing 9
TYMS	thymidylate synthetase
UBE2C	ubiquitin-conjugating enzyme E2C
UBE2L3	ubiquitin-conjugating enzyme E2L 3
UBE2T	ubiquitin-conjugating enzyme E2T (putative)
UBR7
UGGT2
UNG	uracil-DNA glycosylase
USP1	ubiquitin specific peptidase 1
USP28	ubiquitin specific peptidase 28
USP37	ubiquitin specific peptidase 37
USP39	ubiquitin specific peptidase 39
USP54	ubiquitin specific peptidase 54
VAMP3	vesicle-associated membrane protein 3 (cellubrevin)
VAPA	VAMP (vesicle-associated membrane protein)-associated protein A, 33kDa
VCL	vinculin
VOPP1
VPRBP	Vpr (HIV-1) binding protein
VPS36	vacuolar protein sorting 36 (yeast)
VPS4A	vacuolar protein sorting 4 homolog A (S. cerevisiae)
VTI1B	vesicle transport through interaction with t-SNAREs homolog 1B (yeast)
WASF3	WAS protein family, member 3
WDHD1	WD repeat and HMG-box DNA binding protein 1
WDR34	WD repeat domain 34
WDR67	WD repeat domain 67
WDR76	WD repeat domain 76
WDR77	WD repeat domain 77
WDYHV1
WEE1	WEE1 homolog (S. pombe)
WHSC1	Wolf-Hirschhorn syndrome candidate 1
WNK3	WNK lysine deficient protein kinase 3
WRN	Werner syndrome
WT1	Wilms tumor 1
XRCC6	X-ray repair complementing defective repair in Chinese hamster cells 6 (Ku autoantigen, 70kDa)
XRCC6BP1	XRCC6 binding protein 1
YAF2	YY1 associated factor 2
YKT6	YKT6 v-SNARE homolog (S. cerevisiae)
YWHAZ	tyrosine 3-monooxygenase/tryptophan 5-monooxygenase activation protein, zeta polypeptide
ZAK	-
ZBTB8A
ZNF367	zinc finger protein 367
ZNF395	zinc finger protein 395
ZWINT	ZW10 interactor
ZZZ3	zinc finger, ZZ-type containing 3

## Sheet: Up by miR-34b
original id	description
GGACT	gamma-glutamylamine cyclotransferase
MARCHF2	membrane associated ring-CH-type finger 2
MARCHF4	membrane associated ring-CH-type finger 4
MARCHF9	membrane associated ring-CH-type finger 9
SEPTIN8	septin 8
ABCC10	ATP-binding cassette, sub-family C (CFTR/MRP), member 10
ABCC9	ATP-binding cassette, sub-family C (CFTR/MRP), member 9
ABCG1	ATP-binding cassette, sub-family G (WHITE), member 1
ACAD10	acyl-Coenzyme A dehydrogenase family, member 10
ACAP3
ACTL6B	actin-like 6B
ADAM12	ADAM metallopeptidase domain 12 (meltrin alpha)
ADAM22	ADAM metallopeptidase domain 22
AGMAT	agmatine ureohydrolase (agmatinase)
AGTPBP1	ATP/GTP binding protein 1
AHNAK2
AHRR	aryl-hydrocarbon receptor repressor
AKAP12	A kinase (PRKA) anchor protein (gravin) 12
AKD1
AKR1C1	aldo-keto reductase family 1, member C1 (dihydrodiol dehydrogenase 1; 20-alpha (3-alpha)-hydroxysteroid dehydrogenase)
AKR1C2	aldo-keto reductase family 1, member C2 (dihydrodiol dehydrogenase 2; bile acid binding protein; 3-alpha hydroxysteroid dehydrogenase, type III)
AKT3	v-akt murine thymoma viral oncogene homolog 3 (protein kinase B, gamma)
ANAPC1	anaphase promoting complex subunit 1
ANGPT2	angiopoietin 2
ANK1	ankyrin 1, erythrocytic
ANK3	ankyrin 3, node of Ranvier (ankyrin G)
ANKRD16	ankyrin repeat domain 16
ANKRD34A
ANKRD44	ankyrin repeat domain 44
ANKRD46	ankyrin repeat domain 46
AP2A2	adaptor-related protein complex 2, alpha 2 subunit
APC	adenomatosis polyposis coli
APC2	adenomatosis polyposis coli 2
APOL2	apolipoprotein L, 2
ARFGAP2
ARFGEF1	ADP-ribosylation factor guanine nucleotide-exchange factor 1(brefeldin A-inhibited)
ARHGAP18	Rho GTPase activating protein 18
ARHGEF17	Rho guanine nucleotide exchange factor (GEF) 17
ARHGEF3	Rho guanine nucleotide exchange factor (GEF) 3
ARID3B	AT rich interactive domain 3B (BRIGHT- like)
ARID4A	AT rich interactive domain 4A (RBP1-like)
ARL4C	ADP-ribosylation factor-like 4C
ARL6	ADP-ribosylation factor-like 6
ARL8A	ADP-ribosylation factor-like 8A
ARMCX5	armadillo repeat containing, X-linked 5
ARRDC4	arrestin domain containing 4
ATG7	ATG7 autophagy related 7 homolog (S. cerevisiae)
ATP1A1OS
ATP5F1	ATP synthase, H+ transporting, mitochondrial F0 complex, subunit B1
ATP9A	ATPase, Class II, type 9A
ATRN	attractin
ATRNL1	attractin-like 1
ATRX	alpha thalassemia/mental retardation syndrome X-linked (RAD54 homolog, S. cerevisiae)
ATXN1	ataxin 1
ATXN7L1	ataxin 7-like 1
B3GALT2	UDP-Gal:betaGlcNAc beta 1,3-galactosyltransferase, polypeptide 2
B3GNTL1	UDP-GlcNAc:betaGal beta-1,3-N-acetylglucosaminyltransferase-like 1
BAT5	HLA-B associated transcript 5
BBS1	Bardet-Biedl syndrome 1
BBS12
BBS2	Bardet-Biedl syndrome 2
BCL2	B-cell CLL/lymphoma 2
BCL9	B-cell CLL/lymphoma 9
BCR	breakpoint cluster region
BDNF	brain-derived neurotrophic factor
BEND5
BICD1	bicaudal D homolog 1 (Drosophila)
BIK	BCL2-interacting killer (apoptosis-inducing)
BIN1	bridging integrator 1
BMP2K	BMP2 inducible kinase
BPTF
BRWD1	bromodomain and WD repeat domain containing 1
BSDC1	BSD domain containing 1
BTBD9	BTB (POZ) domain containing 9
C10ORF125	chromosome 10 open reading frame 125
C10ORF26	chromosome 10 open reading frame 26
C10ORF32	chromosome 10 open reading frame 32
C11ORF70	chromosome 11 open reading frame 70
C11ORF95
C12ORF68
C12ORF76
C14ORF159	chromosome 14 open reading frame 159
C14ORF179	chromosome 14 open reading frame 179
C14ORF39	chromosome 14 open reading frame 39
C15ORF17	chromosome 15 open reading frame 17
C15ORF52
C15ORF57
C16ORF68	chromosome 16 open reading frame 68
C17ORF59	chromosome 17 open reading frame 59
C17ORF63	chromosome 17 open reading frame 63
C17ORF97
C19ORF12	chromosome 19 open reading frame 12
C19ORF20	chromosome 19 open reading frame 20
C19ORF30	chromosome 19 open reading frame 30
C1ORF114	chromosome 1 open reading frame 114
C1ORF50	chromosome 1 open reading frame 50
C20ORF112	chromosome 20 open reading frame 112
C20ORF12	chromosome 20 open reading frame 12
C20ORF194	chromosome 20 open reading frame 194
C3ORF38	chromosome 3 open reading frame 38
C3ORF62	chromosome 3 open reading frame 62
C4ORF34	chromosome 4 open reading frame 34
C4ORF39
C5ORF41
C5ORF53
C6ORF1	chromosome 6 open reading frame 1
C6ORF154	chromosome 6 open reading frame 154
C6ORF165	chromosome 6 open reading frame 165
C6ORF168	chromosome 6 open reading frame 168
C6ORF170	chromosome 6 open reading frame 170
C6ORF70	chromosome 6 open reading frame 70
C7	complement component 7
C7ORF51
C7ORF70
C8ORF42	chromosome 8 open reading frame 42
C9ORF150	chromosome 9 open reading frame 150
C9ORF9	chromosome 9 open reading frame 9
CACNA1B	calcium channel, voltage-dependent, L type, alpha 1B subunit
CACNA2D3	calcium channel, voltage-dependent, alpha 2/delta 3 subunit
CADM2
CADPS	Ca2+-dependent secretion activator
CAMK1D	calcium/calmodulin-dependent protein kinase ID
CAMK4	calcium/calmodulin-dependent protein kinase IV
CAP2	CAP, adenylate cyclase-associated protein, 2 (yeast)
CARD9	caspase recruitment domain family, member 9
CASK	calcium/calmodulin-dependent serine protein kinase (MAGUK family)
CASKIN1	CASK interacting protein 1
CBFA2T2	core-binding factor, runt domain, alpha subunit 2; translocated to, 2
CBLB	Cas-Br-M (murine) ecotropic retroviral transforming sequence b
CBY1
CCDC112	coiled-coil domain containing 112
CCDC113	coiled-coil domain containing 113
CCDC151
CCDC159
CCDC61
CCDC76	coiled-coil domain containing 76
CCDC78	coiled-coil domain containing 78
CCDC80	coiled-coil domain containing 80
CCDC96	coiled-coil domain containing 96
CCNG2	cyclin G2
CCS	copper chaperone for superoxide dismutase
CD44	CD44 molecule (Indian blood group)
CD47	CD47 molecule
CDC37L1	CDC37 cell division cycle 37 homolog (S. cerevisiae)-like 1
CDH12	cadherin 12, type 2 (N-cadherin 2)
CDK10	cyclin-dependent kinase (CDC2-like) 10
CDK5R1	cyclin-dependent kinase 5, regulatory subunit 1 (p35)
CDRT4	CMT1A duplicated region transcript 4
CELF3
CELF4
CEP120
CHGB	chromogranin B (secretogranin 1)
CHKB	choline kinase beta
CHMP1B	chromatin modifying protein 1B
CHODL	chondrolectin
CHP	-
CIRBP	cold inducible RNA binding protein
CLCN6	chloride channel 6
CLIP3
CLUAP1	clusterin associated protein 1
CMPK1
CNGB1	cyclic nucleotide gated channel beta 1
CNKSR3	CNKSR family member 3
CNNM2	cyclin M2
CNTN1	contactin 1
COL5A2	collagen, type V, alpha 2
COL6A1	collagen, type VI, alpha 1
COL6A6
COPG2	coatomer protein complex, subunit gamma 2
COPZ1	coatomer protein complex, subunit zeta 1
COQ10B	coenzyme Q10 homolog B (S. cerevisiae)
CPEB3	cytoplasmic polyadenylation element binding protein 3
CRAT	carnitine acetyltransferase
CRIPAK	cysteine-rich PAK1 inhibitor
CSAD	cysteine sulfinic acid decarboxylase
CSNK1G1	casein kinase 1, gamma 1
CSRNP3
CTSO	cathepsin O
CUL4B	cullin 4B
CXORF23	chromosome X open reading frame 23
CYB5D2	cytochrome b5 domain containing 2
CYHR1	cysteine/histidine-rich 1
CYLD	cylindromatosis (turban tumor syndrome)
CYTH2
DACT3	dapper, antagonist of beta-catenin, homolog 3 (Xenopus laevis)
DALRD3	DALR anticodon binding domain containing 3
DCAF10
DCAF5
DCLK1
DCLK2
DCTN1	dynactin 1 (p150, glued homolog, Drosophila)
DCX	doublecortex; lissencephaly, X-linked (doublecortin)
DDAH1	dimethylarginine dimethylaminohydrolase 1
DDI2	DDI1, DNA-damage inducible 1, homolog 2 (S. cerevisiae)
DENND5B
DFNA5	deafness, autosomal dominant 5
DGKB	diacylglycerol kinase, beta 90kDa
DISP2	dispatched homolog 2 (Drosophila)
DLG4	discs, large homolog 4 (Drosophila)
DLGAP4	discs, large (Drosophila) homolog-associated protein 4
DLX5	distal-less homeobox 5
DNAH5	dynein, axonemal, heavy chain 5
DNAJB5	DnaJ (Hsp40) homolog, subfamily B, member 5
DNAJC27
DNAJC4	DnaJ (Hsp40) homolog, subfamily C, member 4
DNALI1	dynein, axonemal, light intermediate chain 1
DNM3	dynamin 3
DNMT3A	DNA (cytosine-5-)-methyltransferase 3 alpha
DNPEP	aspartyl aminopeptidase
DOCK10	dedicator of cytokinesis 10
DOCK4	dedicator of cytokinesis 4
DOCK7	dedicator of cytokinesis 7
DPCD
DPP7	dipeptidyl-peptidase 7
DST	dystonin
DSTYK
DTX3	deltex 3 homolog (Drosophila)
DUSP1	dual specificity phosphatase 1
DUSP18	dual specificity phosphatase 18
DUSP6	dual specificity phosphatase 6
DYNC1H1	dynein, cytoplasmic 1, heavy chain 1
DYNC2H1	dynein, cytoplasmic 2, heavy chain 1
DYNC2LI1	dynein, cytoplasmic 2, light intermediate chain 1
DYRK2	dual-specificity tyrosine-(Y)-phosphorylation regulated kinase 2
DYX1C1	dyslexia susceptibility 1 candidate 1
DZIP3	-
EBF1	early B-cell factor 1
EFHC1	EF-hand domain (C-terminal) containing 1
EHBP1	EH domain binding protein 1
EHD1	EH-domain containing 1
EIF2C2	eukaryotic translation initiation factor 2C, 2
EIF2C4	eukaryotic translation initiation factor 2C, 4
EME2	essential meiotic endonuclease 1 homolog 2 (S. pombe)
ENPP2	ectonucleotide pyrophosphatase/phosphodiesterase 2 (autotaxin)
ENSA	endosulfine alpha
ENTPD3	ectonucleoside triphosphate diphosphohydrolase 3
EPHA5	EPH receptor A5
EPHA7	EPH receptor A7
EPHX2	epoxide hydrolase 2, cytoplasmic
ERCC2	excision repair cross-complementing rodent repair deficiency, complementation group 2 (xeroderma pigmentosum D)
ERCC5	excision repair cross-complementing rodent repair deficiency, complementation group 5 (xeroderma pigmentosum, complementation group G (Cockayne syndrome))
ERLIN2
ETV1	ets variant gene 1
ETV6	ets variant gene 6 (TEL oncogene)
EXOC1	exocyst complex component 1
EXOC3	exocyst complex component 3
EXOC7	exocyst complex component 7
FAM116B	family with sequence similarity 116, member B
FAM126B	family with sequence similarity 126, member B
FAM149B1
FAM160B1
FAM164A
FAM179B
FAM18B1
FAM65A	family with sequence similarity 65, member A
FAM73A	family with sequence similarity 73, member A
FAM84A	family with sequence similarity 84, member A
FAM89A	family with sequence similarity 89, member A
FARP1	FERM, RhoGEF (ARHGEF) and pleckstrin domain protein 1 (chondrocyte-derived)
FAT4	FAT tumor suppressor homolog 4 (Drosophila)
FBLIM1	filamin binding LIM protein 1
FBRSL1
FBXO16	F-box protein 16
FBXO28	F-box protein 28
FBXO31	F-box protein 31
FGD4	FYVE, RhoGEF and PH domain containing 4
FGF14	fibroblast growth factor 14
FGF20	fibroblast growth factor 20
FHOD3	formin homology 2 domain containing 3
FIG4
FLCN	folliculin
FLJ22536	-
FLJ31306	-
FLJ35390	-
FLJ39609	-
FLJ43663	-
FLNB	filamin B, beta (actin binding protein 278)
FN1	fibronectin 1
FNBP1	formin binding protein 1
FOXC1	forkhead box C1
FRY	furry homolog (Drosophila)
FRZB	frizzled-related protein
FSD1L	fibronectin type III and SPRY domain containing 1-like
FUCA1	fucosidase, alpha-L- 1, tissue
FYCO1	FYVE and coiled-coil domain containing 1
FZD3	frizzled homolog 3 (Drosophila)
FZD5	frizzled homolog 5 (Drosophila)
GAA	glucosidase, alpha; acid (Pompe disease, glycogen storage disease type II)
GAB2	GRB2-associated binding protein 2
GABBR1	gamma-aminobutyric acid (GABA) B receptor, 1
GALT	galactose-1-phosphate uridylyltransferase
GAP43	growth associated protein 43
GARNL3	GTPase activating Rap/RanGAP domain-like 3
GATA6	GATA binding protein 6
GDF11	growth differentiation factor 11
GDI1	GDP dissociation inhibitor 1
GDPD1	glycerophosphodiester phosphodiesterase domain containing 1
GFOD2	glucose-fructose oxidoreductase domain containing 2
GGA1	golgi associated, gamma adaptin ear containing, ARF binding protein 1
GLS	glutaminase
GNAO1	guanine nucleotide binding protein (G protein), alpha activating activity polypeptide O
GNAS	GNAS complex locus
GNG2	guanine nucleotide binding protein (G protein), gamma 2
GNG3	guanine nucleotide binding protein (G protein), gamma 3
GOLGA1	golgi autoantigen, golgin subfamily a, 1
GOLGA2	golgi autoantigen, golgin subfamily a, 2
GOLGA3	golgi autoantigen, golgin subfamily a, 3
GOLGB1	golgi autoantigen, golgin subfamily b, macrogolgin (with transmembrane signal), 1
GPC2	glypican 2 (cerebroglycan)
GPR137C	G protein-coupled receptor 137C
GPR146	G protein-coupled receptor 146
GPR155	G protein-coupled receptor 155
GPR85	G protein-coupled receptor 85
GPRASP1	G protein-coupled receptor associated sorting protein 1
GPSM1	G-protein signalling modulator 1 (AGS3-like, C. elegans)
GRAMD1A	GRAM domain containing 1A
GRAMD1B	GRAM domain containing 1B
GRIA1	glutamate receptor, ionotropic, AMPA 1
GRINA	glutamate receptor, ionotropic, N-methyl D-asparate-associated protein 1 (glutamate binding)
GRK4	G protein-coupled receptor kinase 4
GRK5	G protein-coupled receptor kinase 5
GTPBP8	GTP-binding protein 8 (putative)
GUCA1A	guanylate cyclase activator 1A (retina)
GZF1	GDNF-inducible zinc finger protein 1
HCFC1R1	host cell factor C1 regulator 1 (XPO1 dependent)
HCFC2	host cell factor C2
HEATR5B
HERC4	hect domain and RLD 4
HEXDC	hexosaminidase (glycosyl hydrolase family 20, catalytic domain) containing
HINT3	histidine triad nucleotide binding protein 3
HIPK2	homeodomain interacting protein kinase 2
HIPK3	homeodomain interacting protein kinase 3
HIST1H2AC	histone cluster 1, H2ac
HIST1H2AK	histone cluster 1, H2ak
HIST1H2BC	histone cluster 1, H2bc
HIST1H2BG	histone cluster 1, H2bg
HIST1H3E	histone cluster 1, H3e
HIST1H4H	histone cluster 1, H4h
HIVEP2	human immunodeficiency virus type I enhancer binding protein 2
HMGCL	3-hydroxymethyl-3-methylglutaryl-Coenzyme A lyase (hydroxymethylglutaricaciduria)
HOOK2	hook homolog 2 (Drosophila)
HS6ST3	heparan sulfate 6-O-sulfotransferase 3
ICAM2	intercellular adhesion molecule 2
IDS	iduronate 2-sulfatase (Hunter syndrome)
IFFO1
IFI16	interferon, gamma-inducible protein 16
IFT27
IFT88	intraflagellar transport 88 homolog (Chlamydomonas)
IL17RD	interleukin 17 receptor D
IMPACT	Impact homolog (mouse)
INA	internexin neuronal intermediate filament protein, alpha
INTU
IP6K2
IPMK	inositol polyphosphate multikinase
IQCE	IQ motif containing E
IRF9
IRS2	insulin receptor substrate 2
ISL1	ISL1 transcription factor, LIM/homeodomain, (islet-1)
ISYNA1	-
ITGA1	integrin, alpha 1
ITSN1	intersectin 1 (SH3 domain protein)
IVD	isovaleryl Coenzyme A dehydrogenase
JAK1	Janus kinase 1 (a protein tyrosine kinase)
JAKMIP2	janus kinase and microtubule interacting protein 2
JAKMIP3
JHDM1D
JMJD4	jumonji domain containing 4
KALRN	kalirin, RhoGEF kinase
KCNA3	potassium voltage-gated channel, shaker-related subfamily, member 3
KCNJ2	potassium inwardly-rectifying channel, subfamily J, member 2
KCNK10	potassium channel, subfamily K, member 10
KCNMB4	potassium large conductance calcium-activated channel, subfamily M, beta member 4
KCNQ2	potassium voltage-gated channel, KQT-like subfamily, member 2
KCTD13	potassium channel tetramerisation domain containing 13
KCTD21	potassium channel tetramerisation domain containing 21
KDM4A
KDM5B
KDM6B
KIAA0232	-
KIAA0408	KIAA0408
KIAA0513	KIAA0513
KIAA0895L
KIAA0913	KIAA0913
KIAA1024	-
KIAA1109	KIAA1109
KIAA1370	KIAA1370
KIAA1377	KIAA1377
KIAA1530	-
KIAA1549	-
KIAA1841	KIAA1841
KIDINS220	-
KIF1B	kinesin family member 1B
KIF3A	kinesin family member 3A
KIF3B	kinesin family member 3B
KIF5A	kinesin family member 5A
KIF5C	kinesin family member 5C
KLF10	Kruppel-like factor 10
KLF9	Kruppel-like factor 9
KLHL24	kelch-like 24 (Drosophila)
KLHL28
KLHL36
KLRAQ1
KPNA5	karyopherin alpha 5 (importin alpha 6)
KRBA2	KRAB-A domain containing 2
LANCL1	LanC lantibiotic synthetase component C-like 1 (bacterial)
LCA5	Leber congenital amaurosis 5
LCOR	ligand dependent nuclear receptor corepressor
LETM2	leucine zipper-EF-hand containing transmembrane protein 2
LIN7A	lin-7 homolog A (C. elegans)
LIN7B	lin-7 homolog B (C. elegans)
LMF1
LMO2	LIM domain only 2 (rhombotin-like 1)
LMO4	LIM domain only 4
LOC100009676
LOC100128288
LOC100129550
LOC100129845
LOC100130360
LOC100131564
LOC100132288
LOC100132891
LOC100286925
LOC100287331
LOC100288152
LOC100288617
LOC100288985
LOC100289019
LOC100505490
LOC100505560
LOC100505728
LOC100505956
LOC100506019
LOC100506295
LOC100506728
LOC100506979
LOC100507039
LOC100507110
LOC100507291
LOC100507297
LOC100507372
LOC100507486
LOC100508307
LOC100508546
LOC147670	-
LOC284373	-
LOC284408	-
LOC284440
LOC285147	-
LOC286071	-
LOC375190	-
LOC389834	-
LOC401134	-
LOC401233	-
LOC440104	-
LOC440934	-
LOC441617	-
LOC641467	-
LOC642533	-
LOC642852	-
LOC644242	-
LOC647979	-
LOC728190	-
LOC728485	-
LONP2
LPHN3	latrophilin 3
LPPR2	-
LPPR5
LRCH1	leucine-rich repeats and calponin homology (CH) domain containing 1
LRRC16A
LRRC23	leucine rich repeat containing 23
LRRC27	leucine rich repeat containing 27
LRRC4	leucine rich repeat containing 4
LRRC4C	leucine rich repeat containing 4C
LRRC68
LRRFIP1	leucine rich repeat (in FLII) interacting protein 1
LRRTM2	leucine rich repeat transmembrane neuronal 2
LSM14B	LSM14 homolog B (SCD6, S. cerevisiae)
LTK	leukocyte tyrosine kinase
MAFB	v-maf musculoaponeurotic fibrosarcoma oncogene homolog B (avian)
MAGED2	melanoma antigen family D, 2
MAGI3	membrane associated guanylate kinase, WW and PDZ domain containing 3
MALAT1	metastasis associated lung adenocarcinoma transcript 1 (non-coding RNA)
MAML2	mastermind-like 2 (Drosophila)
MAOA	monoamine oxidase A
MAP1A	microtubule-associated protein 1A
MAP1B	microtubule-associated protein 1B
MAP1LC3B	microtubule-associated protein 1 light chain 3 beta
MAP3K12	mitogen-activated protein kinase kinase kinase 12
MAP3K13	mitogen-activated protein kinase kinase kinase 13
MAP6	microtubule-associated protein 6
MAPK10	mitogen-activated protein kinase 10
MAPK8	mitogen-activated protein kinase 8
MAPRE2	microtubule-associated protein, RP/EB family, member 2
MAST1	microtubule associated serine/threonine kinase 1
MAST4	microtubule associated serine/threonine kinase family member 4
MBD5	methyl-CpG binding domain protein 5
MBNL2	muscleblind-like 2 (Drosophila)
MCF2L	MCF.2 cell line derived transforming sequence-like
MCOLN1	mucolipin 1
MDH1B	malate dehydrogenase 1B, NAD (soluble)
MECOM
MED12	mediator of RNA polymerase II transcription, subunit 12 homolog (S. cerevisiae)
MEF2D	MADS box transcription enhancer factor 2, polypeptide D (myocyte enhancer factor 2D)
MEIS3	Meis1, myeloid ecotropic viral integration site 1 homolog 3 (mouse)
METRNL	meteorin, glial cell differentiation regulator-like
MFAP3L	microfibrillar-associated protein 3-like
MFSD10
MFSD6
MFSD9
MGAT4C	mannosyl (alpha-1,3-)-glycoprotein beta-1,4-N-acetylglucosaminyltransferase, isozyme C (putative)
MGC16703	-
MGEA5	meningioma expressed antigen 5 (hyaluronidase)
MIAT
MINK1	misshapen-like kinase 1 (zebrafish)
MKRN1	makorin, ring finger protein, 1
MORC3	MORC family CW-type zinc finger 3
MPG	N-methylpurine-DNA glycosylase
MREG
MT1E	metallothionein 1E (functional)
MT1F	metallothionein 1F (functional)
MT1G	metallothionein 1G
MT1P2
MT1X	metallothionein 1X
MT2A	metallothionein 2A
MTA3	metastasis associated 1 family, member 3
MTF1	metal-regulatory transcription factor 1
MUM1	melanoma associated antigen (mutated) 1
MXD1	MAX dimerization protein 1
MXD4	MAX dimerization protein 4
MYL5	myosin, light chain 5, regulatory
MYO5B	myosin VB
MYT1	myelin transcription factor 1
MYT1L	myelin transcription factor 1-like
NACAD
NAPB	N-ethylmaleimide-sensitive factor attachment protein, beta
NARG2	NMDA receptor regulated 2
NAT1	N-acetyltransferase 1 (arylamine N-acetyltransferase)
NBAS
NBEA	neurobeachin
NCAM2	neural cell adhesion molecule 2
NCOA1	nuclear receptor coactivator 1
NCOA3	nuclear receptor coactivator 3
NCRNA00081
NCRNA00094
NCRNA00247
NCRNA00294
NDRG4	NDRG family member 4
NDUFS1	NADH dehydrogenase (ubiquinone) Fe-S protein 1, 75kDa (NADH-coenzyme Q reductase)
NECAB3
NEDD4L	neural precursor cell expressed, developmentally down-regulated 4-like
NEDD9	neural precursor cell expressed, developmentally down-regulated 9
NELF	nasal embryonic LHRH factor
NFAT5	nuclear factor of activated T-cells 5, tonicity-responsive
NFATC2IP	nuclear factor of activated T-cells, cytoplasmic, calcineurin-dependent 2 interacting protein
NFIA	nuclear factor I/A
NGLY1	N-glycanase 1
NHEDC1
NHLRC3
NLK	nemo-like kinase
NME3	non-metastatic cells 3, protein expressed in
NME5	non-metastatic cells 5, protein expressed in (nucleoside-diphosphate kinase)
NMNAT2	nicotinamide nucleotide adenylyltransferase 2
NPHP3	nephronophthisis 3 (adolescent)
NRBP1	nuclear receptor binding protein 1
NRD1	nardilysin (N-arginine dibasic convertase)
NRXN1	neurexin 1
NT5E	5'-nucleotidase, ecto (CD73)
NTRK1	neurotrophic tyrosine kinase, receptor, type 1
ODF2L	outer dense fiber of sperm tails 2-like
OGT	O-linked N-acetylglucosamine (GlcNAc) transferase (UDP-N-acetylglucosamine:polypeptide-N-acetylglucosaminyl transferase)
ONECUT2	one cut domain, family member 2
OPTN	optineurin
OSCP1
OSTM1	osteopetrosis associated transmembrane protein 1
OTUD5	OTU domain containing 5
PACS2	phosphofurin acidic cluster sorting protein 2
PAK3	p21 (CDKN1A)-activated kinase 3
PALMD	palmdelphin
PAR5	-
PARP6	poly (ADP-ribose) polymerase family, member 6
PATZ1	POZ (BTB) and AT hook containing zinc finger 1
PCDH17	protocadherin 17
PCDHB10	protocadherin beta 10
PCDHB14	protocadherin beta 14
PCDHB15	protocadherin beta 15
PCDHB18	protocadherin beta 18 pseudogene
PCDHB6	protocadherin beta 6
PCDHB7	protocadherin beta 7
PCDHGA4	protocadherin gamma subfamily A, 4
PCLO	piccolo (presynaptic cytomatrix protein)
PCMTD1	protein-L-isoaspartate (D-aspartate) O-methyltransferase domain containing 1
PCNXL2	pecanex-like 2 (Drosophila)
PCSK1N	proprotein convertase subtilisin/kexin type 1 inhibitor
PDCD4	programmed cell death 4 (neoplastic transformation inhibitor)
PDE10A	phosphodiesterase 10A
PDE1C	phosphodiesterase 1C, calmodulin-dependent 70kDa
PDE4DIP	phosphodiesterase 4D interacting protein (myomegalin)
PELO	pelota homolog (Drosophila)
PEX19	peroxisomal biogenesis factor 19
PGAM2	phosphoglycerate mutase 2 (muscle)
PHF21A	PHD finger protein 21A
PHLDB3	pleckstrin homology-like domain, family B, member 3
PIH1D2
PIK3IP1
PIK3R1	phosphoinositide-3-kinase, regulatory subunit 1 (p85 alpha)
PIK3R2	phosphoinositide-3-kinase, regulatory subunit 2 (p85 beta)
PIK3R3	phosphoinositide-3-kinase, regulatory subunit 3 (p55, gamma)
PISD	phosphatidylserine decarboxylase
PITPNC1	phosphatidylinositol transfer protein, cytoplasmic 1
PKIA	protein kinase (cAMP-dependent, catalytic) inhibitor alpha
PKIB	protein kinase (cAMP-dependent, catalytic) inhibitor beta
PKIG	protein kinase (cAMP-dependent, catalytic) inhibitor gamma
PLCB4	phospholipase C, beta 4
PLCD4	phospholipase C, delta 4
PLCXD2	phosphatidylinositol-specific phospholipase C, X domain containing 2
PLCXD3	phosphatidylinositol-specific phospholipase C, X domain containing 3
PLD5	phospholipase D family, member 5
PLEKHA3	pleckstrin homology domain containing, family A (phosphoinositide binding specific) member 3
PLEKHH3	pleckstrin homology domain containing, family H (with MyTH4 domain) member 3
PLK2	polo-like kinase 2 (Drosophila)
PLTP	phospholipid transfer protein
PMS1	PMS1 postmeiotic segregation increased 1 (S. cerevisiae)
PNRC1	proline-rich nuclear receptor coactivator 1
POLD4	polymerase (DNA-directed), delta 4
POLR3GL	polymerase (RNA) III (DNA directed) polypeptide G (32kD) like
POMT1	protein-O-mannosyltransferase 1
PPFIBP2	PTPRF interacting protein, binding protein 2 (liprin beta 2)
PPIL6	peptidylprolyl isomerase (cyclophilin)-like 6
PPL	periplakin
PPOX	protoporphyrinogen oxidase
PPP1R9A	protein phosphatase 1, regulatory (inhibitor) subunit 9A
PPP2R1B	protein phosphatase 2 (formerly 2A), regulatory subunit A (PR 65), beta isoform
PPP2R5B	protein phosphatase 2, regulatory subunit B (B56), beta isoform
PRAF2	PRA1 domain family, member 2
PREPL	prolyl endopeptidase-like
PRKCH	protein kinase C, eta
PRKCZ	protein kinase C, zeta
PRKXP1	protein kinase, X-linked, pseudogene 1
PRLHR	prolactin releasing hormone receptor
PRMT2	protein arginine methyltransferase 2
PRR16	proline rich 16
PRRT2	proline-rich transmembrane protein 2
PRUNE2
PSPH	phosphoserine phosphatase
PTGER3	prostaglandin E receptor 3 (subtype EP3)
PTPRB	protein tyrosine phosphatase, receptor type, B
PTPRF	protein tyrosine phosphatase, receptor type, F
PTPRH	protein tyrosine phosphatase, receptor type, H
PTPRK	protein tyrosine phosphatase, receptor type, K
PTPRN2	protein tyrosine phosphatase, receptor type, N polypeptide 2
PWWP2B
QDPR	quinoid dihydropteridine reductase
RAB11FIP4	RAB11 family interacting protein 4 (class II)
RAB30	RAB30, member RAS oncogene family
RAB39B	RAB39B, member RAS oncogene family
RAB3D	RAB3D, member RAS oncogene family
RAB40B	RAB40B, member RAS oncogene family
RAB4B	RAB4B, member RAS oncogene family
RAB6B	RAB6B, member RAS oncogene family
RASA3	RAS p21 protein activator 3
RBKS	ribokinase
RBM25	RNA binding motif protein 25
RBMS3	RNA binding motif, single stranded interacting protein
REC8
RGS13	regulator of G-protein signalling 13
RGS2	regulator of G-protein signalling 2, 24kDa
RIBC1	RIB43A domain with coiled-coils 1
RIMBP2	RIMS binding protein 2
RIOK3	RIO kinase 3 (yeast)
RMND5A	required for meiotic nuclear division 5 homolog A (S. cerevisiae)
RNASET2	ribonuclease T2
RNF150	ring finger protein 150
RNF165	ring finger protein 165
RNF207	ring finger protein 207
RNF213
RNF41	ring finger protein 41
ROBO2	roundabout, axon guidance receptor, homolog 2 (Drosophila)
ROGDI	rogdi homolog (Drosophila)
RORA	RAR-related orphan receptor A
RP1-177G6.2
RPS6KA2	ribosomal protein S6 kinase, 90kDa, polypeptide 2
RPS6KA6	ribosomal protein S6 kinase, 90kDa, polypeptide 6
RSL1D1	ribosomal L1 domain containing 1
RSPH1
RSPH3
RTN2	reticulon 2
RUFY3	RUN and FYVE domain containing 3
RUNDC3A
RWDD2B
SAMD11	sterile alpha motif domain containing 11
SAMSN1	SAM domain, SH3 domain and nuclear localisation signals, 1
SATB1	special AT-rich sequence binding protein 1 (binds to nuclear matrix/scaffold-associating DNA's)
SBK1	SH3-binding domain kinase 1
SBNO1	strawberry notch homolog 1 (Drosophila)
SCAMP1	secretory carrier membrane protein 1
SCAPER
SCG5	secretogranin V (7B2 protein)
SCN2A
SCN3B	sodium channel, voltage-gated, type III, beta
SCRT1	scratch homolog 1, zinc finger protein (Drosophila)
SDC3	syndecan 3 (N-syndecan)
SDSL	serine dehydratase-like
SECISBP2L
SEPSECS
SERINC3	serine incorporator 3
SESN2	sestrin 2
SESN3	sestrin 3
SEZ6L2	seizure related 6 homolog (mouse)-like 2
SGIP1	SH3-domain GRB2-like (endophilin) interacting protein 1
SGK1
SGSH	N-sulfoglucosamine sulfohydrolase (sulfamidase)
SGSM2
SH2D3C	SH2 domain containing 3C
SH3BP5	SH3-domain binding protein 5 (BTK-associated)
SH3PXD2A	SH3 and PX domains 2A
SH3RF1	SH3 domain containing ring finger 1
SHANK2	SH3 and multiple ankyrin repeat domains 2
SHANK3	SH3 and multiple ankyrin repeat domains 3
SHC1	SHC (Src homology 2 domain containing) transforming protein 1
SHC3	SHC (Src homology 2 domain containing) transforming protein 3
SHOX2	short stature homeobox 2
SIAE	sialic acid acetylesterase
SIDT2	SID1 transmembrane family, member 2
SIK1
SIK2
SIK3
SIPA1L1	signal-induced proliferation-associated 1 like 1
SLC22A4	solute carrier family 22 (organic cation transporter), member 4
SLC25A14	solute carrier family 25 (mitochondrial carrier, brain), member 14
SLC25A16	solute carrier family 25 (mitochondrial carrier; Graves disease autoantigen), member 16
SLC26A11	solute carrier family 26, member 11
SLC2A3	solute carrier family 2 (facilitated glucose transporter), member 3
SLC35D2	solute carrier family 35, member D2
SLC39A6	solute carrier family 39 (zinc transporter), member 6
SLC44A5	solute carrier family 44, member 5
SLC6A2	solute carrier family 6 (neurotransmitter transporter, noradrenalin), member 2
SLC6A8	solute carrier family 6 (neurotransmitter transporter, creatine), member 8
SLITRK6	SLIT and NTRK-like family, member 6
SMARCD2	SWI/SNF related, matrix associated, actin dependent regulator of chromatin, subfamily d, member 2
SMARCD3	SWI/SNF related, matrix associated, actin dependent regulator of chromatin, subfamily d, member 3
SMURF2	SMAD specific E3 ubiquitin protein ligase 2
SNAPC3	small nuclear RNA activating complex, polypeptide 3, 50kDa
SNRPN	small nuclear ribonucleoprotein polypeptide N
SNX21	sorting nexin family member 21
SOBP
SOCS2	suppressor of cytokine signaling 2
SPAG16	sperm associated antigen 16
SPATA17	spermatogenesis associated 17
SPATA2L
SPATA7	spermatogenesis associated 7
SPEF2
SPG11	spastic paraplegia 11 (autosomal recessive)
SPIN3	spindlin family, member 3
SPINK5	serine peptidase inhibitor, Kazal type 5
SPOCK1	sparc/osteonectin, cwcv and kazal-like domains proteoglycan (testican) 1
SPOPL
SPTAN1	spectrin, alpha, non-erythrocytic 1 (alpha-fodrin)
SRGAP3	SLIT-ROBO Rho GTPase activating protein 3
SRRM3
SSBP1	single-stranded DNA binding protein 1
SSH1	slingshot homolog 1 (Drosophila)
ST6GAL2	ST6 beta-galactosamide alpha-2,6-sialyltranferase 2
ST6GALNAC4	ST6 (alpha-N-acetyl-neuraminyl-2,3-beta-galactosyl-1,3)-N-acetylgalactosaminide alpha-2,6-sialyltransferase 4
ST8SIA1	ST8 alpha-N-acetyl-neuraminide alpha-2,8-sialyltransferase 1
ST8SIA4	ST8 alpha-N-acetyl-neuraminide alpha-2,8-sialyltransferase 4
STAM2	signal transducing adaptor molecule (SH3 domain and ITAM motif) 2
STAR	steroidogenic acute regulator
STC1	stanniocalcin 1
STK10	serine/threonine kinase 10
STMN4	stathmin-like 4
STS	steroid sulfatase (microsomal), arylsulfatase C, isozyme S
STX12	syntaxin 12
STX4	syntaxin 4
STXBP5	syntaxin binding protein 5 (tomosyn)
STYX	serine/threonine/tyrosine interacting protein
SUV420H1	suppressor of variegation 4-20 homolog 1 (Drosophila)
SVOP	SV2 related protein homolog (rat)
SYBU
SYN2	synapsin II
SYNE1	spectrin repeat containing, nuclear envelope 1
SYNE2	spectrin repeat containing, nuclear envelope 2
SYNGR3	synaptogyrin 3
SYNPO2	synaptopodin 2
SYT11	synaptotagmin XI
TAF1	TAF1 RNA polymerase II, TATA box binding protein (TBP)-associated factor, 250kDa
TAGLN3	transgelin 3
TBC1D10B	TBC1 domain family, member 10B
TBC1D19	TBC1 domain family, member 19
TBC1D8	TBC1 domain family, member 8 (with GRAM domain)
TBC1D9	TBC1 domain family, member 9 (with GRAM domain)
TCP11L1	t-complex 11 (mouse) like 1
TCTN1
TDRD3	tudor domain containing 3
TECPR1
TECPR2
TERF2IP	telomeric repeat binding factor 2, interacting protein
TFAP2B	transcription factor AP-2 beta (activating enhancer binding protein 2 beta)
THAP8	THAP domain containing 8
THBS3	thrombospondin 3
TIAM2	T-cell lymphoma invasion and metastasis 2
TLCD2
TM7SF2	transmembrane 7 superfamily member 2
TMEM130	transmembrane protein 130
TMEM132A	transmembrane protein 132A
TMEM136	transmembrane protein 136
TMEM150C
TMEM151B
TMEM187
TMEM38A	transmembrane protein 38A
TMEM87B	transmembrane protein 87B
TMOD1	tropomodulin 1
TNKS2	tankyrase, TRF1-interacting ankyrin-related ADP-ribose polymerase 2
TNRC18	trinucleotide repeat containing 18
TOLLIP	toll interacting protein
TOX	-
TP53INP1	tumor protein p53 inducible nuclear protein 1
TPP1	tripeptidyl peptidase I
TPPP	-
TPRG1L
TRIB1	tribbles homolog 1 (Drosophila)
TRIM4	tripartite motif-containing 4
TRIM46	tripartite motif-containing 46
TRIOBP	TRIO and F-actin binding protein
TRO	trophinin
TRPM8	transient receptor potential cation channel, subfamily M, member 8
TSC2	tuberous sclerosis 2
TSC22D1	TSC22 domain family, member 1
TSC22D3	TSC22 domain family, member 3
TSHZ2	teashirt family zinc finger 2
TSNARE1	t-SNARE domain containing 1
TSPAN31	tetraspanin 31
TSPAN8	tetraspanin 8
TSPYL2	TSPY-like 2
TTC12	tetratricopeptide repeat domain 12
TTC17	tetratricopeptide repeat domain 17
TTC25	tetratricopeptide repeat domain 25
TTC30A	tetratricopeptide repeat domain 30A
TTC30B	tetratricopeptide repeat domain 30B
TTC39C
TTLL1	tubulin tyrosine ligase-like family, member 1
TUBB4	tubulin, beta 4
TUBG2	tubulin, gamma 2
TUBGCP6	tubulin, gamma complex associated protein 6
TXNIP	thioredoxin interacting protein
UBE2B	ubiquitin-conjugating enzyme E2B (RAD6 homolog)
UBE2H	ubiquitin-conjugating enzyme E2H (UBC8 homolog, yeast)
UBE2L6	ubiquitin-conjugating enzyme E2L 6
UBE2Q2	ubiquitin-conjugating enzyme E2Q (putative) 2
UBE2QL1
UBE2R2	ubiquitin-conjugating enzyme E2R 2
UBR4
UCKL1	uridine-cytidine kinase 1-like 1
ULK2	unc-51-like kinase 2 (C. elegans)
UNC80
USE1
USP35	ubiquitin specific peptidase 35
VLDLR	very low density lipoprotein receptor
VPS33B	vacuolar protein sorting 33B (yeast)
WDR31	WD repeat domain 31
WDR45	WD repeat domain 45
WDR47	WD repeat domain 47
WDR78	WD repeat domain 78
WDR86	WD repeat domain 86
WSB1	WD repeat and SOCS box-containing 1
XPO5	exportin 5
XPR1	xenotropic and polytropic retrovirus receptor
YPEL2	yippee-like 2 (Drosophila)
YPEL3	yippee-like 3 (Drosophila)
YPEL5	yippee-like 5 (Drosophila)
ZBTB20	zinc finger and BTB domain containing 20
ZBTB38	zinc finger and BTB domain containing 38
ZBTB4	zinc finger and BTB domain containing 4
ZCCHC7	zinc finger, CCHC domain containing 7
ZDHHC11	zinc finger, DHHC-type containing 11
ZEB1
ZFP14	zinc finger protein 14 homolog (mouse)
ZFP2	zinc finger protein 2 homolog (mouse)
ZFP90	zinc finger protein 90 homolog (mouse)
ZKSCAN1	zinc finger with KRAB and SCAN domains 1
ZMYM4	zinc finger, MYM-type 4
ZMYM5	zinc finger, MYM-type 5
ZNF177	zinc finger protein 177
ZNF211	zinc finger protein 211
ZNF223	zinc finger protein 223
ZNF225	zinc finger protein 225
ZNF226	zinc finger protein 226
ZNF227	zinc finger protein 227
ZNF233	zinc finger protein 233
ZNF234	zinc finger protein 234
ZNF25	zinc finger protein 25
ZNF264	zinc finger protein 264
ZNF268	zinc finger protein 268
ZNF276	zinc finger protein 276
ZNF277	zinc finger protein 277
ZNF280D
ZNF284	zinc finger protein 284
ZNF302	zinc finger protein 302
ZNF329	zinc finger protein 329
ZNF333	zinc finger protein 333
ZNF350	zinc finger protein 350
ZNF404	zinc finger protein 404
ZNF420	zinc finger protein 420
ZNF44	zinc finger protein 44
ZNF441	zinc finger protein 441
ZNF467	zinc finger protein 467
ZNF514	zinc finger protein 514
ZNF529	zinc finger protein 529
ZNF540	zinc finger protein 540
ZNF556	zinc finger protein 556
ZNF557	zinc finger protein 557
ZNF558	zinc finger protein 558
ZNF573	zinc finger protein 573
ZNF581	zinc finger protein 581
ZNF583	zinc finger protein 583
ZNF596	zinc finger protein 596
ZNF605	zinc finger protein 605
ZNF606	zinc finger protein 606
ZNF609	zinc finger protein 609
ZNF610	zinc finger protein 610
ZNF626	zinc finger protein 626
ZNF641	zinc finger protein 641
ZNF652	zinc finger protein 652
ZNF677	zinc finger protein 677
ZNF688	zinc finger protein 688
ZNF697	zinc finger protein 697
ZNF703	zinc finger protein 703
ZNF704	zinc finger protein 704
ZNF713	zinc finger protein 713
ZNF720	zinc finger protein 720
ZNF738	zinc finger protein 738
ZNF74	zinc finger protein 74
ZNF780B	zinc finger protein 780B
ZNF781	zinc finger protein 781
ZNF791	zinc finger protein 791
ZNF792	zinc finger protein 792
ZNF793	zinc finger protein 793
ZNF805
ZNF827
ZNF84	zinc finger protein 84
ZNF846
ZNF862
ZNF880
ZSCAN18
ZXDB	zinc finger, X-linked, duplicated B
ZXDC	ZXD family zinc finger C

## Sheet: Down by miR-34c
original id	description
AAGAB
ABCA1	ATP-binding cassette, sub-family A (ABC1), member 1
ABCB1	ATP-binding cassette, sub-family B (MDR/TAP), member 1
ABCD2	ATP-binding cassette, sub-family D (ALD), member 2
ABHD12	abhydrolase domain containing 12
ACAA2	acetyl-Coenzyme A acyltransferase 2 (mitochondrial 3-oxoacyl-Coenzyme A thiolase)
ACE	angiotensin I converting enzyme (peptidyl-dipeptidase A) 1
ACSL4	acyl-CoA synthetase long-chain family member 4
ACTA2	actin, alpha 2, smooth muscle, aorta
ADAMTS2	ADAM metallopeptidase with thrombospondin type 1 motif, 2
ADAMTS3	ADAM metallopeptidase with thrombospondin type 1 motif, 3
ADCY3	adenylate cyclase 3
ADD2	adducin 2 (beta)
ADI1	acireductone dioxygenase 1
ADK	adenosine kinase
ADM	adrenomedullin
ADO
ADORA2B	adenosine A2b receptor
AEBP2	AE binding protein 2
AEN
AFG3L1P
AIP	aryl hydrocarbon receptor interacting protein
AK2	adenylate kinase 2
AK4
AKT2	v-akt murine thymoma viral oncogene homolog 2
ALG10	asparagine-linked glycosylation 10 homolog (yeast, alpha-1,2-glucosyltransferase)
ALKBH2	alkB, alkylation repair homolog 2 (E. coli)
AMPD3	adenosine monophosphate deaminase (isoform E)
ANGPTL2	angiopoietin-like 2
ANKRD10	ankyrin repeat domain 10
ANKRD43	ankyrin repeat domain 43
ANKS6	ankyrin repeat and sterile alpha motif domain containing 6
ANLN	anillin, actin binding protein
ANP32E	acidic (leucine-rich) nuclear phosphoprotein 32 family, member E
ANXA5	annexin A5
AOX1	aldehyde oxidase 1
AP1S2	adaptor-related protein complex 1, sigma 2 subunit
AP2S1	adaptor-related protein complex 2, sigma 1 subunit
APEX2	APEX nuclease (apurinic/apyrimidinic endonuclease) 2
API5	apoptosis inhibitor 5
APPL1
AQP10	aquaporin 10
ARAF	v-raf murine sarcoma 3611 viral oncogene homolog
ARAP2
ARGLU1
ARHGAP1	Rho GTPase activating protein 1
ARHGAP11A	Rho GTPase activating protein 11A
ARHGAP19	Rho GTPase activating protein 19
ARHGAP28	Rho GTPase activating protein 28
ARHGAP42
ARHGAP6	Rho GTPase activating protein 6
ARIH2	ariadne homolog 2 (Drosophila)
ARL4A	ADP-ribosylation factor-like 4A
ARL6IP6	ADP-ribosylation-like factor 6 interacting protein 6
ARSB	arylsulfatase B
ARV1	ARV1 homolog (S. cerevisiae)
AS3MT	arsenic (+3 oxidation state) methyltransferase
ASAP1
ASCL1	achaete-scute complex-like 1 (Drosophila)
ASF1B	ASF1 anti-silencing function 1 homolog B (S. cerevisiae)
ASPM	asp (abnormal spindle) homolog, microcephaly associated (Drosophila)
ASS1	argininosuccinate synthetase 1
ASXL1	additional sex combs like 1 (Drosophila)
ATAD2	ATPase family, AAA domain containing 2
ATAD5
ATL3
ATP1B3	ATPase, Na+/K+ transporting, beta 3 polypeptide
ATPAF1	ATP synthase mitochondrial F1 complex assembly factor 1
ATPBD4	ATP binding domain 4
ATPIF1	ATPase inhibitory factor 1
AURKA	aurora kinase A
AURKB	aurora kinase B
B3GALNT1	beta-1,3-N-acetylgalactosaminyltransferase 1 (globoside blood group)
B3GALTL	beta 1,3-galactosyltransferase-like
B4GALT1	UDP-Gal:betaGlcNAc beta 1,4- galactosyltransferase, polypeptide 1
B4GALT3	UDP-Gal:betaGlcNAc beta 1,4- galactosyltransferase, polypeptide 3
BARD1	BRCA1 associated RING domain 1
BAT2	HLA-B associated transcript 2
BAZ2A	bromodomain adjacent to zinc finger domain, 2A
BCL2L12	BCL2-like 12 (proline rich)
BCLAF1	BCL2-associated transcription factor 1
BCOR	BCL6 co-repressor
BICD1	bicaudal D homolog 1 (Drosophila)
BIRC5	baculoviral IAP repeat-containing 5 (survivin)
BLM	Bloom syndrome
BLMH	bleomycin hydrolase
BMP7	bone morphogenetic protein 7 (osteogenic protein 1)
BNC2	basonuclin 2
BRCA1	breast cancer 1, early onset
BRCA2	breast cancer 2, early onset
BRD7	bromodomain containing 7
BRI3BP	BRI3 binding protein
BRIP1	BRCA1 interacting protein C-terminal helicase 1
BUB1	BUB1 budding uninhibited by benzimidazoles 1 homolog (yeast)
BUB1B	BUB1 budding uninhibited by benzimidazoles 1 homolog beta (yeast)
C10ORF119	chromosome 10 open reading frame 119
C10ORF78	chromosome 10 open reading frame 78
C10ORF84	chromosome 10 open reading frame 84
C11ORF31	chromosome 11 open reading frame 31
C11ORF82
C12ORF32	chromosome 12 open reading frame 32
C12ORF34	chromosome 12 open reading frame 34
C12ORF48	chromosome 12 open reading frame 48
C13ORF34	chromosome 13 open reading frame 34
C14ORF106	chromosome 14 open reading frame 106
C14ORF145	chromosome 14 open reading frame 145
C15ORF42	chromosome 15 open reading frame 42
C16ORF5	chromosome 16 open reading frame 5
C16ORF59	chromosome 16 open reading frame 59
C16ORF75	chromosome 16 open reading frame 75
C17ORF81	chromosome 17 open reading frame 81
C18ORF1	chromosome 18 open reading frame 1
C18ORF10	chromosome 18 open reading frame 10
C18ORF54	chromosome 18 open reading frame 54
C19ORF48	chromosome 19 open reading frame 48
C19ORF56	chromosome 19 open reading frame 56
C1ORF112	chromosome 1 open reading frame 112
C1ORF135	chromosome 1 open reading frame 135
C1ORF144	chromosome 1 open reading frame 144
C1ORF61	chromosome 1 open reading frame 61
C20ORF117	chromosome 20 open reading frame 117
C20ORF27	chromosome 20 open reading frame 27
C20ORF72	chromosome 20 open reading frame 72
C20ORF94	chromosome 20 open reading frame 94
C21ORF45	chromosome 21 open reading frame 45
C21ORF58	chromosome 21 open reading frame 58
C22ORF39
C2CD2
C2ORF43	chromosome 2 open reading frame 43
C2ORF67
C3ORF14	chromosome 3 open reading frame 14
C3ORF58	chromosome 3 open reading frame 58
C3ORF63	chromosome 3 open reading frame 63
C4ORF21	chromosome 4 open reading frame 21
C5ORF34
C5ORF39
C6ORF115	chromosome 6 open reading frame 115
C6ORF147	chromosome 6 open reading frame 147
C6ORF89	chromosome 6 open reading frame 89
C7ORF23	chromosome 7 open reading frame 23
C7ORF49	chromosome 7 open reading frame 49
C8ORF76	chromosome 8 open reading frame 76
C9ORF100	chromosome 9 open reading frame 100
C9ORF140	chromosome 9 open reading frame 140
CABLES2	Cdk5 and Abl enzyme substrate 2
CALCB	calcitonin-related polypeptide, beta
CALCOCO2	calcium binding and coiled-coil domain 2
CALML4	calmodulin-like 4
CAMK2D	calcium/calmodulin-dependent protein kinase (CaM kinase) II delta
CAND2	cullin-associated and neddylation-dissociated 2 (putative)
CASC5	cancer susceptibility candidate 5
CASP2	caspase 2, apoptosis-related cysteine peptidase (neural precursor cell expressed, developmentally down-regulated 2)
CASP8AP2	CASP8 associated protein 2
CBLN1	cerebellin 1 precursor
CBX2	chromobox homolog 2 (Pc class homolog, Drosophila)
CBX5	chromobox homolog 5 (HP1 alpha homolog, Drosophila)
CCBL1	cysteine conjugate-beta lyase; cytoplasmic (glutamine transaminase K, kyneurenine aminotransferase)
CCDC15	coiled-coil domain containing 15
CCDC150
CCDC163P
CCDC18	coiled-coil domain containing 18
CCDC21	coiled-coil domain containing 21
CCDC3	coiled-coil domain containing 3
CCDC50	coiled-coil domain containing 50
CCDC99	coiled-coil domain containing 99
CCNA2	cyclin A2
CCNB1	cyclin B1
CCNB2	cyclin B2
CCNE2	cyclin E2
CCNF	cyclin F
CCNG1	cyclin G1
CD200	CD200 molecule
CDC20	CDC20 cell division cycle 20 homolog (S. cerevisiae)
CDC23	CDC23 (cell division cycle 23, yeast, homolog)
CDC25A	cell division cycle 25A
CDC25B	cell division cycle 25B
CDC25C	cell division cycle 25C
CDC45
CDC6	CDC6 cell division cycle 6 homolog (S. cerevisiae)
CDC7	CDC7 cell division cycle 7 (S. cerevisiae)
CDCA2	cell division cycle associated 2
CDCA3	cell division cycle associated 3
CDCA4	cell division cycle associated 4
CDCA5	cell division cycle associated 5
CDCA7	cell division cycle associated 7
CDCA7L	cell division cycle associated 7-like
CDCA8	cell division cycle associated 8
CDH10	cadherin 10, type 2 (T2-cadherin)
CDH11	cadherin 11, type 2, OB-cadherin (osteoblast)
CDH24	cadherin-like 24
CDK1
CDK2	cyclin-dependent kinase 2
CDK4	cyclin-dependent kinase 4
CDKN2C	cyclin-dependent kinase inhibitor 2C (p18, inhibits CDK4)
CDKN3	cyclin-dependent kinase inhibitor 3 (CDK2-associated dual specificity phosphatase)
CDT1	chromatin licensing and DNA replication factor 1
CENPA	centromere protein A
CENPE	centromere protein E, 312kDa
CENPF	centromere protein F, 350/400ka (mitosin)
CENPH	centromere protein H
CENPI	centromere protein I
CENPJ	centromere protein J
CENPK	centromere protein K
CENPL	centromere protein L
CENPM	centromere protein M
CENPN	centromere protein N
CENPO	centromere protein O
CENPW
CEP152	centrosomal protein 152kDa
CEP192	centrosomal protein 192kDa
CEP55	centrosomal protein 55kDa
CEP57L1
CEP70	centrosomal protein 70kDa
CEP72	centrosomal protein 72kDa
CFL1	cofilin 1 (non-muscle)
CHAC2	ChaC, cation transport regulator homolog 2 (E. coli)
CHAF1A	chromatin assembly factor 1, subunit A (p150)
CHAF1B	chromatin assembly factor 1, subunit B (p60)
CHEK1	CHK1 checkpoint homolog (S. pombe)
CHEK2	CHK2 checkpoint homolog (S. pombe)
CHMP7	CHMP family, member 7
CHPT1	choline phosphotransferase 1
CHRAC1	chromatin accessibility complex 1
CHTF18	CTF18, chromosome transmission fidelity factor 18 homolog (S. cerevisiae)
CIT	citron (rho-interacting, serine/threonine kinase 21)
CKAP2	cytoskeleton associated protein 2
CKAP2L	cytoskeleton associated protein 2-like
CKLF	chemokine-like factor
CKS1B	CDC28 protein kinase regulatory subunit 1B
CLN3	ceroid-lipofuscinosis, neuronal 3, juvenile (Batten, Spielmeyer-Vogt disease)
CLN6	ceroid-lipofuscinosis, neuronal 6, late infantile, variant
CLSPN	claspin homolog (Xenopus laevis)
CMTM7	CKLF-like MARVEL transmembrane domain containing 7
CNN1	calponin 1, basic, smooth muscle
CNOT6	CCR4-NOT transcription complex, subunit 6
CNPY3
CNTN4	contactin 4
CNTNAP2	contactin associated protein-like 2
COL4A2	collagen, type IV, alpha 2
CPLX2	complexin 2
CPSF6	cleavage and polyadenylation specific factor 6, 68kDa
CRIP2	cysteine-rich protein 2
CRTAP	cartilage associated protein
CRYGD	crystallin, gamma D
CSRP2	cysteine and glycine-rich protein 2
CSTF3	cleavage stimulation factor, 3' pre-RNA, subunit 3, 77kDa
CTDSP1	CTD (carboxy-terminal domain, RNA polymerase II, polypeptide A) small phosphatase 1
CTDSP2	CTD (carboxy-terminal domain, RNA polymerase II, polypeptide A) small phosphatase 2
CTDSPL	CTD (carboxy-terminal domain, RNA polymerase II, polypeptide A) small phosphatase-like
CTDSPL2	CTD (carboxy-terminal domain, RNA polymerase II, polypeptide A) small phosphatase like 2
CTNND1	catenin (cadherin-associated protein), delta 1
CTSB	cathepsin B
CTSC	cathepsin C
CTSH	cathepsin H
CTSL2	cathepsin L2
CWF19L1	CWF19-like 1, cell cycle control (S. pombe)
CXCL12	chemokine (C-X-C motif) ligand 12 (stromal cell-derived factor 1)
CXCR7	chemokine (C-X-C motif) receptor 7
CXXC1	CXXC finger 1 (PHD domain)
CYB5B	cytochrome b5 type B (outer mitochondrial membrane)
CYB5RL
CYBASC3	cytochrome b, ascorbate dependent 3
CYP2R1	cytochrome P450, family 2, subfamily R, polypeptide 1
DARS2	aspartyl-tRNA synthetase 2 (mitochondrial)
DAXX	death-associated protein 6
DBF4B	DBF4 homolog B (S. cerevisiae)
DCLRE1A	DNA cross-link repair 1A (PSO2 homolog, S. cerevisiae)
DCLRE1B	DNA cross-link repair 1B (PSO2 homolog, S. cerevisiae)
DCP2	DCP2 decapping enzyme homolog (S. cerevisiae)
DCTPP1
DDB2	damage-specific DNA binding protein 2, 48kDa
DDX10	DEAD (Asp-Glu-Ala-Asp) box polypeptide 10
DDX11	DEAD/H (Asp-Glu-Ala-Asp/His) box polypeptide 11 (CHL1-like helicase homolog, S. cerevisiae)
DDX39	DEAD (Asp-Glu-Ala-Asp) box polypeptide 39
DDX46	DEAD (Asp-Glu-Ala-Asp) box polypeptide 46
DEK	DEK oncogene (DNA binding)
DENND1B	DENN/MADD domain containing 1B
DEPDC1	DEP domain containing 1
DEPDC1B	DEP domain containing 1B
DEPDC7	DEP domain containing 7
DGCR14	DiGeorge syndrome critical region gene 14
DHFR	dihydrofolate reductase
DHRS13	dehydrogenase/reductase (SDR family) member 13
DHRS7B	dehydrogenase/reductase (SDR family) member 7B
DHX37	DEAH (Asp-Glu-Ala-His) box polypeptide 37
DIAPH1	diaphanous homolog 1 (Drosophila)
DIAPH3	diaphanous homolog 3 (Drosophila)
DIS3L2
DKFZP434L187	-
DLEU1	deleted in lymphocytic leukemia, 1
DLEU2	deleted in lymphocytic leukemia, 2
DLGAP5
DMD	dystrophin (muscular dystrophy, Duchenne and Becker types)
DNA2
DNAJB12	DnaJ (Hsp40) homolog, subfamily B, member 12
DNAJC10	DnaJ (Hsp40) homolog, subfamily C, member 10
DNAJC21
DNAJC9	DnaJ (Hsp40) homolog, subfamily C, member 9
DONSON	downstream neighbor of SON
DOT1L	DOT1-like, histone H3 methyltransferase (S. cerevisiae)
DPF1	D4, zinc and double PHD fingers family 1
DPM2	dolichyl-phosphate mannosyltransferase polypeptide 2, regulatory subunit
DPY19L4	dpy-19-like 4 (C. elegans)
DSCC1
DSEL
DSN1
DTL	denticleless homolog (Drosophila)
DTYMK	deoxythymidylate kinase (thymidylate kinase)
DUSP22	dual specificity phosphatase 22
DUT	dUTP pyrophosphatase
E2F1	E2F transcription factor 1
E2F2	E2F transcription factor 2
E2F5	E2F transcription factor 5, p130-binding
E2F7	E2F transcription factor 7
E2F8	E2F transcription factor 8
EAF2	ELL associated factor 2
ECE2	endothelin converting enzyme 2
ECT2	epithelial cell transforming sequence 2 oncogene
EED	embryonic ectoderm development
EEF2K	eukaryotic elongation factor-2 kinase
EFNA5	ephrin-A5
EHMT2	euchromatic histone-lysine N-methyltransferase 2
EI24	etoposide induced 2.4 mRNA
EIF2S2	eukaryotic translation initiation factor 2, subunit 2 beta, 38kDa
EIF3G
EIF3H
ELAVL1	ELAV (embryonic lethal, abnormal vision, Drosophila)-like 1 (Hu antigen R)
EME1	essential meiotic endonuclease 1 homolog 1 (S. pombe)
EML5	echinoderm microtubule associated protein like 5
EMP2	epithelial membrane protein 2
ENAH	enabled homolog (Drosophila)
ENDOG	endonuclease G
ENO1	enolase 1, (alpha)
ENOSF1	enolase superfamily member 1
EPAS1	endothelial PAS domain protein 1
EPB41L3	erythrocyte membrane protein band 4.1-like 3
EPHA8	EPH receptor A8
EPR1	effector cell peptidase receptor 1
ERCC1	excision repair cross-complementing rodent repair deficiency, complementation group 1 (includes overlapping antisense sequence)
ERCC6L
ERGIC1	endoplasmic reticulum-golgi intermediate compartment (ERGIC) 1
ERI1
ERLIN1
ESCO2	establishment of cohesion 1 homolog 2 (S. cerevisiae)
ESPL1	extra spindle poles like 1 (S. cerevisiae)
ETS1	v-ets erythroblastosis virus E26 oncogene homolog 1 (avian)
EXO1	exonuclease 1
EXOSC5	exosome component 5
EXOSC8	exosome component 8
EZH2	enhancer of zeste homolog 2 (Drosophila)
FAH	fumarylacetoacetate hydrolase (fumarylacetoacetase)
FAM111B	family with sequence similarity 111, member B
FAM122B	family with sequence similarity 122B
FAM124A	family with sequence similarity 124A
FAM126A	family with sequence similarity 126, member A
FAM127A
FAM127B
FAM155B
FAM167A
FAM40B	family with sequence similarity 40, member B
FAM54A	family with sequence similarity 54, member A
FAM59B	family with sequence similarity 59, member B
FAM64A	family with sequence similarity 64, member A
FAM69A	family with sequence similarity 69, member A
FAM70A	family with sequence similarity 70, member A
FAM76A	family with sequence similarity 76, member A
FAM76B	family with sequence similarity 76, member B
FAM83D	family with sequence similarity 83, member D
FANCA	Fanconi anemia, complementation group A
FANCB	Fanconi anemia, complementation group B
FANCC	Fanconi anemia, complementation group C
FANCD2	Fanconi anemia, complementation group D2
FANCE	Fanconi anemia, complementation group E
FANCG	Fanconi anemia, complementation group G
FANCI	Fanconi anemia, complementation group I
FANCM	Fanconi anemia, complementation group M
FBLN1	fibulin 1
FBXO10	F-box protein 10
FBXO5	F-box protein 5
FEM1A	fem-1 homolog a (C.elegans)
FEN1	flap structure-specific endonuclease 1
FGFR1	fibroblast growth factor receptor 1 (fms-related tyrosine kinase 2, Pfeiffer syndrome)
FHL2	four and a half LIM domains 2
FIGN	fidgetin
FIGNL1	fidgetin-like 1
FKBP1A	FK506 binding protein 1A, 12kDa
FKSG49	-
FLJ45482	-
FLOT2	flotillin 2
FOXJ2	forkhead box J2
FOXM1	forkhead box M1
FOXN2	forkhead box N2
FOXN3
FOXRED2	FAD-dependent oxidoreductase domain containing 2
FUS	fusion (involved in t(12;16) in malignant liposarcoma)
FUT10	fucosyltransferase 10 (alpha (1,3) fucosyltransferase)
FUT4	fucosyltransferase 4 (alpha (1,3) fucosyltransferase, myeloid-specific)
FUT8	fucosyltransferase 8 (alpha (1,6) fucosyltransferase)
FUT9	fucosyltransferase 9 (alpha (1,3) fucosyltransferase)
G2E3
GABRB1	gamma-aminobutyric acid (GABA) A receptor, beta 1
GABRQ	gamma-aminobutyric acid (GABA) receptor, theta
GALM	galactose mutarotase (aldose 1-epimerase)
GALNT7	UDP-N-acetyl-alpha-D-galactosamine:polypeptide N-acetylgalactosaminyltransferase 7 (GalNAc-T7)
GAS1	growth arrest-specific 1
GAS2L3	growth arrest-specific 2 like 3
GAS5	growth arrest-specific 5
GEMIN5	gem (nuclear organelle) associated protein 5
GFRA3	GDNF family receptor alpha 3
GGH	gamma-glutamyl hydrolase (conjugase, folylpolygammaglutamyl hydrolase)
GINS1	GINS complex subunit 1 (Psf1 homolog)
GINS2	GINS complex subunit 2 (Psf2 homolog)
GINS3	GINS complex subunit 3 (Psf3 homolog)
GINS4	GINS complex subunit 4 (Sld5 homolog)
GJC1	gap junction protein, chi 1, 31.9kDa (connexin 31.9)
GLE1
GLIS2	GLIS family zinc finger 2
GLRX5	glutaredoxin 5 homolog (S. cerevisiae)
GLT8D1	glycosyltransferase 8 domain containing 1
GMFB	glia maturation factor, beta
GMNN	geminin, DNA replication inhibitor
GNAS-AS
GNPDA1	glucosamine-6-phosphate deaminase 1
GOLIM4
GOLPH3L	golgi phosphoprotein 3-like
GORASP2	golgi reassembly stacking protein 2, 55kDa
GPC6	glypican 6
GPD2	glycerol-3-phosphate dehydrogenase 2 (mitochondrial)
GPR107	G protein-coupled receptor 107
GPR176	G protein-coupled receptor 176
GPSM2	G-protein signalling modulator 2 (AGS3-like, C. elegans)
GPX3	glutathione peroxidase 3 (plasma)
GRIK3	glutamate receptor, ionotropic, kainate 3
GRN	granulin
GSG2	germ cell associated 2 (haspin)
GSPT1	G1 to S phase transition 1
GSTT2	glutathione S-transferase theta 2
GTF3C2	general transcription factor IIIC, polypeptide 2, beta 110kDa
GTSE1	G-2 and S-phase expressed 1
GUCY1B3	guanylate cyclase 1, soluble, beta 3
GUSB	glucuronidase, beta
GUSBP3
GXYLT1
H2AFV	H2A histone family, member V
H2AFX	H2A histone family, member X
HACE1	HECT domain and ankyrin repeat containing, E3 ubiquitin protein ligase 1
HADH	hydroxyacyl-Coenzyme A dehydrogenase
HAT1	histone acetyltransferase 1
HAUS1
HAUS4
HAUS7
HAUS8
HCN3	hyperpolarization activated cyclic nucleotide-gated potassium channel 3
HDAC1	histone deacetylase 1
HEBP1	heme binding protein 1
HECTD2	HECT domain containing 2
HELLS	helicase, lymphoid-specific
HES1	hairy and enhancer of split 1, (Drosophila)
HGF	hepatocyte growth factor (hepapoietin A; scatter factor)
HINT1	histidine triad nucleotide binding protein 1
HIP1	huntingtin interacting protein 1
HIRIP3	HIRA interacting protein 3
HIST1H4A	histone cluster 1, H4a
HIST3H2A	histone cluster 3, H2a
HJURP
HMGB1	high-mobility group box 1
HMGN4	high mobility group nucleosomal binding domain 4
HMGN5
HMMR	hyaluronan-mediated motility receptor (RHAMM)
HN1	hematological and neurological expressed 1
HNRNPD
HOOK1	hook homolog 1 (Drosophila)
HP1BP3	heterochromatin protein 1, binding protein 3
HPCAL4	hippocalcin like 4
HPDL
HRASLS	HRAS-like suppressor
HRH3	histamine receptor H3
HSD17B10
HSD17B6	hydroxysteroid (17-beta) dehydrogenase 6
HSPA2	heat shock 70kDa protein 2
HSPB11
ID3	inhibitor of DNA binding 3, dominant negative helix-loop-helix protein
IFRD2	interferon-related developmental regulator 2
IGDCC3
IGFBP4	insulin-like growth factor binding protein 4
IKBKB	inhibitor of kappa light polypeptide gene enhancer in B-cells, kinase beta
IL2RB	interleukin 2 receptor, beta
IMPDH1	IMP (inosine monophosphate) dehydrogenase 1
INCENP	inner centromere protein antigens 135/155kDa
INF2
ING3	inhibitor of growth family, member 3
IQGAP3	IQ motif containing GTPase activating protein 3
IRAK1	interleukin-1 receptor-associated kinase 1
IRS1	insulin receptor substrate 1
IRX3	iroquois homeobox protein 3
ISY1
ITGA4	integrin, alpha 4 (antigen CD49D, alpha 4 subunit of VLA-4 receptor)
ITGB3BP	integrin beta 3 binding protein (beta3-endonexin)
KANK2
KBTBD7	kelch repeat and BTB (POZ) domain containing 7
KCNG3	potassium voltage-gated channel, subfamily G, member 3
KCNK3	potassium channel, subfamily K, member 3
KCNQ5	potassium voltage-gated channel, KQT-like subfamily, member 5
KCTD12	potassium channel tetramerisation domain containing 12
KCTD3	potassium channel tetramerisation domain containing 3
KDELC2	KDEL (Lys-Asp-Glu-Leu) containing 2
KIAA0101	KIAA0101
KIAA0494	KIAA0494
KIAA1274	KIAA1274
KIAA1429	KIAA1429
KIAA1524	KIAA1524
KIAA1704	KIAA1704
KIAA1731	KIAA1731
KIF11	kinesin family member 11
KIF14	kinesin family member 14
KIF15	kinesin family member 15
KIF18A	kinesin family member 18A
KIF18B
KIF1A	kinesin family member 1A
KIF20A	kinesin family member 20A
KIF20B
KIF22	kinesin family member 22
KIF23	kinesin family member 23
KIF2C	kinesin family member 2C
KIF4A	kinesin family member 4A
KIFC1	kinesin family member C1
KITLG	KIT ligand
KLF11	Kruppel-like factor 11
KLF15	Kruppel-like factor 15
KNTC1	kinetochore associated 1
LAPTM4B	lysosomal associated protein transmembrane 4 beta
LARP4	La ribonucleoprotein domain family, member 4
LBR	lamin B receptor
LDHA	lactate dehydrogenase A
LDLRAD3	low density lipoprotein receptor class A domain containing 3
LEF1	lymphoid enhancer-binding factor 1
LFNG	lunatic fringe homolog (Drosophila)
LHX9	LIM homeobox 9
LIG1	ligase I, DNA, ATP-dependent
LIX1	Lix1 homolog (mouse)
LLPH
LMAN2L	lectin, mannose-binding 2-like
LMNB1	lamin B1
LMO1	LIM domain only 1 (rhombotin 1)
LMO3	LIM domain only 3 (rhombotin-like 2)
LOC100127983
LOC100128191
LOC100131067
LOC100190986
LOC100272216
LOC100287616
LOC100288693
LOC100506638
LOC100506761
LOC100507057
LOC100507303
LOC100507773
LOC100509629
LOC283481	-
LOC344595	-
LOC346887	-
LOC401074	-
LOC401321	-
LOC401588	-
LOC440288	-
LOC440434	-
LOC441046	-
LOC442075	-
LOC641518	-
LOC644538	-
LOC645561	-
LOX	lysyl oxidase
LOXL3	lysyl oxidase-like 3
LPCAT3
LRP3	low density lipoprotein receptor-related protein 3
LRPPRC	leucine-rich PPR-motif containing
LRRC40	leucine rich repeat containing 40
LRRTM1	leucine rich repeat transmembrane neuronal 1
LSM2	LSM2 homolog, U6 small nuclear RNA associated (S. cerevisiae)
LSM5	LSM5 homolog, U6 small nuclear RNA associated (S. cerevisiae)
LUC7L3
MAD2L1	MAD2 mitotic arrest deficient-like 1 (yeast)
MAD2L2	MAD2 mitotic arrest deficient-like 2 (yeast)
MAGOHB
MAGT1
MAP3K3	mitogen-activated protein kinase kinase kinase 3
MAPK1IP1L
MASTL	microtubule associated serine/threonine kinase-like
MATR3	matrin 3
MCM10	MCM10 minichromosome maintenance deficient 10 (S. cerevisiae)
MCM2	MCM2 minichromosome maintenance deficient 2, mitotin (S. cerevisiae)
MCM3	MCM3 minichromosome maintenance deficient 3 (S. cerevisiae)
MCM4	MCM4 minichromosome maintenance deficient 4 (S. cerevisiae)
MCM5	MCM5 minichromosome maintenance deficient 5, cell division cycle 46 (S. cerevisiae)
MCM6	MCM6 minichromosome maintenance deficient 6 (MIS5 homolog, S. pombe) (S. cerevisiae)
MCM7	MCM7 minichromosome maintenance deficient 7 (S. cerevisiae)
MCM8	MCM8 minichromosome maintenance deficient 8 (S. cerevisiae)
MED22
MED8	mediator of RNA polymerase II transcription, subunit 8 homolog (S. cerevisiae)
MELK	maternal embryonic leucine zipper kinase
METAP1	methionyl aminopeptidase 1
METTL4	methyltransferase like 4
MEX3C
MGC27345	-
MGC45800	-
MIR17HG
MKI67	antigen identified by monoclonal antibody Ki-67
MLF1IP	MLF1 interacting protein
MMAB	methylmalonic aciduria (cobalamin deficiency) cblB type
MMACHC	methylmalonic aciduria (cobalamin deficiency) cblC type, with homocystinuria
MMD	monocyte to macrophage differentiation-associated
MMP16	matrix metallopeptidase 16 (membrane-inserted)
MND1	meiotic nuclear divisions 1 homolog (S. cerevisiae)
MPHOSPH6	M-phase phosphoprotein 6
MPV17L2
MRE11A	MRE11 meiotic recombination 11 homolog A (S. cerevisiae)
MRPL30	mitochondrial ribosomal protein L30
MRPS11	mitochondrial ribosomal protein S11
MRPS12	mitochondrial ribosomal protein S12
MSH6	mutS homolog 6 (E. coli)
MST4
MTAP	methylthioadenosine phosphorylase
MTHFD1	methylenetetrahydrofolate dehydrogenase (NADP+ dependent) 1, methenyltetrahydrofolate cyclohydrolase, formyltetrahydrofolate synthetase
MTHFD1L	methylenetetrahydrofolate dehydrogenase (NADP+ dependent) 1-like
MTMR10	myotubularin related protein 10
MTUS2
MXD3	MAX dimerization protein 3
MYBL1	v-myb myeloblastosis viral oncogene homolog (avian)-like 1
MYBL2	v-myb myeloblastosis viral oncogene homolog (avian)-like 2
MYO19
MYPOP
N4BP2L1
NAA16
NAA50
NAALAD2	N-acetylated alpha-linked acidic dipeptidase 2
NAGPA	N-acetylglucosamine-1-phosphodiester alpha-N-acetylglucosaminidase
NAMPT
NANP	N-acetylneuraminic acid phosphatase
NAP1L1	nucleosome assembly protein 1-like 1
NAPG	N-ethylmaleimide-sensitive factor attachment protein, gamma
NASP	nuclear autoantigenic sperm protein (histone-binding)
NAT15
NAV1	neuron navigator 1
NCAPD2	non-SMC condensin I complex, subunit D2
NCAPD3	non-SMC condensin II complex, subunit D3
NCAPG	non-SMC condensin I complex, subunit G
NCAPG2	non-SMC condensin II complex, subunit G2
NCAPH	non-SMC condensin I complex, subunit H
NCAPH2	non-SMC condensin II complex, subunit H2
NCRNA00275
ND6	mitochondrially encoded NADH dehydrogenase 6
NDC80
NDE1	nudE nuclear distribution gene E homolog 1 (A. nidulans)
NDST1	N-deacetylase/N-sulfotransferase (heparan glucosaminyl) 1
NECAB2
NEDD1	neural precursor cell expressed, developmentally down-regulated 1
NEDD4	neural precursor cell expressed, developmentally down-regulated 4
NEIL3	nei endonuclease VIII-like 3 (E. coli)
NEK2	NIMA (never in mitosis gene a)-related kinase 2
NEK3	NIMA (never in mitosis gene a)-related kinase 3
NENF	neuron derived neurotrophic factor
NET1	neuroepithelial cell transforming gene 1
NETO2	neuropilin (NRP) and tolloid (TLL)-like 2
NEXN	nexilin (F actin binding protein)
NFKB1	nuclear factor of kappa light polypeptide gene enhancer in B-cells 1 (p105)
NINJ1	ninjurin 1
NOC4L	nucleolar complex associated 4 homolog (S. cerevisiae)
NOL10	nucleolar protein 10
NPIPL3
NPL	N-acetylneuraminate pyruvate lyase (dihydrodipicolinate synthase)
NPM3	nucleophosmin/nucleoplasmin, 3
NPTX2	neuronal pentraxin II
NRGN	neurogranin (protein kinase C substrate, RC3)
NRM	nurim (nuclear envelope membrane protein)
NRN1	neuritin 1
NRP2	neuropilin 2
NRTN	neurturin
NSA2
NUCKS1	nuclear casein kinase and cyclin-dependent kinase substrate 1
NUDT1	nudix (nucleoside diphosphate linked moiety X)-type motif 1
NUDT10	nudix (nucleoside diphosphate linked moiety X)-type motif 10
NUF2
NUP210	nucleoporin 210kDa
NUP214	nucleoporin 214kDa
NUP43	nucleoporin 43kDa
NUP88	nucleoporin 88kDa
NUP98	nucleoporin 98kDa
NUPL1	nucleoporin like 1
NUSAP1	nucleolar and spindle associated protein 1
NXPH1	neurexophilin 1
NXPH2	neurexophilin 2
NXT1	NTF2-like export factor 1
NXT2	nuclear transport factor 2-like export factor 2
OAF	OAF homolog (Drosophila)
OAS1	2',5'-oligoadenylate synthetase 1, 40/46kDa
OGDH	oxoglutarate (alpha-ketoglutarate) dehydrogenase (lipoamide)
OGFRL1	opioid growth factor receptor-like 1
OIP5	Opa interacting protein 5
OLFM3	olfactomedin 3
ORC1
ORC6
P2RY6	pyrimidinergic receptor P2Y, G-protein coupled, 6
PABPC4L	poly(A) binding protein, cytoplasmic 4-like
PALLD	palladin, cytoskeletal associated protein
PASK	PAS domain containing serine/threonine kinase
PAX5	paired box gene 5 (B-cell lineage specific activator)
PAXIP1	PAX interacting (with transcription-activation domain) protein 1
PBK	PDZ binding kinase
PCBP2	poly(rC) binding protein 2
PCDH18	protocadherin 18
PCDH19	protocadherin 19
PCDH7	BH-protocadherin (brain-heart)
PCDH9	protocadherin 9
PCGF6	polycomb group ring finger 6
PCNA	proliferating cell nuclear antigen
PCNX	pecanex homolog (Drosophila)
PCOLCE2	procollagen C-endopeptidase enhancer 2
PCSK1	proprotein convertase subtilisin/kexin type 1
PDE4B	phosphodiesterase 4B, cAMP-specific (phosphodiesterase E4 dunce homolog, Drosophila)
PDE8A	phosphodiesterase 8A
PDLIM1	PDZ and LIM domain 1 (elfin)
PDLIM2	PDZ and LIM domain 2 (mystique)
PDZRN3	PDZ domain containing RING finger 3
PEF1	penta-EF-hand domain containing 1
PELO	pelota homolog (Drosophila)
PER2	period homolog 2 (Drosophila)
PFKFB3	6-phosphofructo-2-kinase/fructose-2,6-biphosphatase 3
PHB	prohibitin
PHF17	PHD finger protein 17
PHF19	PHD finger protein 19
PHGDH	phosphoglycerate dehydrogenase
PHLDB2	pleckstrin homology-like domain, family B, member 2
PHTF2	putative homeodomain transcription factor 2
PIF1
PIK3CB	phosphoinositide-3-kinase, catalytic, beta polypeptide
PKMYT1	protein kinase, membrane associated tyrosine/threonine 1
PKP4	plakophilin 4
PLBD1
PLEKHA1	pleckstrin homology domain containing, family A (phosphoinositide binding specific) member 1
PLIN2
PLK1	polo-like kinase 1 (Drosophila)
PLK4	polo-like kinase 4 (Drosophila)
PLOD1	procollagen-lysine 1, 2-oxoglutarate 5-dioxygenase 1
PLOD2	procollagen-lysine, 2-oxoglutarate 5-dioxygenase 2
PLS1	plastin 1 (I isoform)
PLSCR1	phospholipid scramblase 1
PMF1	polyamine-modulated factor 1
POC1A
POLA1	polymerase (DNA directed), alpha 1
POLA2	polymerase (DNA directed), alpha 2 (70kD subunit)
POLD1	polymerase (DNA directed), delta 1, catalytic subunit 125kDa
POLD3	polymerase (DNA-directed), delta 3, accessory subunit
POLE	polymerase (DNA directed), epsilon
POLE2	polymerase (DNA directed), epsilon 2 (p59 subunit)
POLQ	polymerase (DNA directed), theta
POLR2H	polymerase (RNA) II (DNA directed) polypeptide H
POLR3G	polymerase (RNA) III (DNA directed) polypeptide G (32kD)
POLR3K	polymerase (RNA) III (DNA directed) polypeptide K, 12.3 kDa
PON2	paraoxonase 2
POP4	processing of precursor 4, ribonuclease P/MRP subunit (S. cerevisiae)
PPARGC1B	peroxisome proliferative activated receptor, gamma, coactivator 1, beta
PPIL5	peptidylprolyl isomerase (cyclophilin)-like 5
PPP1CA	protein phosphatase 1, catalytic subunit, alpha isoform
PPP1R11	protein phosphatase 1, regulatory (inhibitor) subunit 11
PPP1R3E	protein phosphatase 1, regulatory (inhibitor) subunit 3E
PPP2R2B	protein phosphatase 2 (formerly 2A), regulatory subunit B (PR 52), beta isoform
PPP2R3B	protein phosphatase 2 (formerly 2A), regulatory subunit B'', beta
PPP6R3
PRC1	protein regulator of cytokinesis 1
PREB	prolactin regulatory element binding
PRELID2
PREP	prolyl endopeptidase
PRIM1	primase, polypeptide 1, 49kDa
PRIM2
PRIMA1	proline rich membrane anchor 1
PRKD3	protein kinase D3
PROSC	proline synthetase co-transcribed homolog (bacterial)
PRPS2	phosphoribosyl pyrophosphate synthetase 2
PRR11	proline rich 11
PRTFDC1	phosphoribosyl transferase domain containing 1
PSIP1	PC4 and SFRS1 interacting protein 1
PSMC3IP	PSMC3 interacting protein
PSMD7	proteasome (prosome, macropain) 26S subunit, non-ATPase, 7 (Mov34 homolog)
PSRC1	proline/serine-rich coiled-coil 1
PTMS	parathymosin
PTPN2	protein tyrosine phosphatase, non-receptor type 2
PTPRO	protein tyrosine phosphatase, receptor type, O
PTTG1	pituitary tumor-transforming 1
PTTG3P
PVRL1	poliovirus receptor-related 1 (herpesvirus entry mediator C; nectin)
QKI	quaking homolog, KH domain RNA binding (mouse)
QPRT	quinolinate phosphoribosyltransferase (nicotinate-nucleotide pyrophosphorylase (carboxylating))
R3HDM1	R3H domain containing 1
RAB31	RAB31, member RAS oncogene family
RAB3C	RAB3C, member RAS oncogene family
RAB7L1	RAB7, member RAS oncogene family-like 1
RACGAP1	Rac GTPase activating protein 1
RAD18	RAD18 homolog (S. cerevisiae)
RAD51	RAD51 homolog (RecA homolog, E. coli) (S. cerevisiae)
RAD51AP1	RAD51 associated protein 1
RAD51L3	RAD51-like 3 (S. cerevisiae)
RAD54B	RAD54 homolog B (S. cerevisiae)
RAD54L	RAD54-like (S. cerevisiae)
RAD9A	RAD9 homolog A (S. pombe)
RAE1	RAE1 RNA export 1 homolog (S. pombe)
RALYL
RANGRF
RAPGEF4	Rap guanine nucleotide exchange factor (GEF) 4
RASL11B	RAS-like, family 11, member B
RBBP4	retinoblastoma binding protein 4
RBBP8	retinoblastoma binding protein 8
RBL1	retinoblastoma-like 1 (p107)
RBM15	RNA binding motif protein 15
RBMS2	RNA binding motif, single stranded interacting protein 2
RBPMS	RNA binding protein with multiple splicing
RBPMS2	RNA binding protein with multiple splicing 2
RC3H2
RCC1	regulator of chromosome condensation 1
RDM1	RAD52 motif 1
RECK	reversion-inducing-cysteine-rich protein with kazal motifs
RECQL	RecQ protein-like (DNA helicase Q1-like)
RECQL4	RecQ protein-like 4
REL	v-rel reticuloendotheliosis viral oncogene homolog (avian)
RFC2	replication factor C (activator 1) 2, 40kDa
RFC3	replication factor C (activator 1) 3, 38kDa
RFC4	replication factor C (activator 1) 4, 37kDa
RFC5	replication factor C (activator 1) 5, 36.5kDa
RFWD3	ring finger and WD repeat domain 3
RFXAP	regulatory factor X-associated protein
RGMB	RGM domain family, member B
RGNEF	-
RGS4	regulator of G-protein signalling 4
RHEBL1	Ras homolog enriched in brain like 1
RHOBTB3	Rho-related BTB domain containing 3
RIBC2	RIB43A domain with coiled-coils 2
RIMS3	regulating synaptic membrane exocytosis 3
RMI1	RMI1, RecQ mediated genome instability 1, homolog (S. cerevisiae)
RNASEH2A	ribonuclease H2, subunit A
RNASEH2B	ribonuclease H2, subunit B
RNASEH2C	ribonuclease H2, subunit C
RNF138	ring finger protein 138
RNF219
RPAP1	RNA polymerase II associated protein 1
RPIA	ribose 5-phosphate isomerase A (ribose 5-phosphate epimerase)
RPL39L	ribosomal protein L39-like
RPP25	ribonuclease P 25kDa subunit
RPS28	ribosomal protein S28
RQCD1	RCD1 required for cell differentiation1 homolog (S. pombe)
RRAS2	related RAS viral (r-ras) oncogene homolog 2
RRM1	ribonucleotide reductase M1 polypeptide
RRM2	ribonucleotide reductase M2 polypeptide
RTKN2
RTTN	rotatin
RUNX1T1	runt-related transcription factor 1; translocated to, 1 (cyclin D-related)
RWDD1	RWD domain containing 1
S1PR3
SAAL1	serum amyloid A-like 1
SAC3D1	SAC3 domain containing 1
SARS	seryl-tRNA synthetase
SCARA3	scavenger receptor class A, member 3
SCGN	secretagogin, EF-hand calcium binding protein
SCLT1	sodium channel and clathrin linker 1
SCMH1	sex comb on midleg homolog 1 (Drosophila)
SCML1	sex comb on midleg-like 1 (Drosophila)
SCML2	sex comb on midleg-like 2 (Drosophila)
SCRIB	scribbled homolog (Drosophila)
SDC1	syndecan 1
SDC2	syndecan 2 (heparan sulfate proteoglycan 1, cell surface-associated, fibroglycan)
SEMA3E	sema domain, immunoglobulin domain (Ig), short basic domain, secreted, (semaphorin) 3E
SEMA6A	sema domain, transmembrane domain (TM), and cytoplasmic domain, (semaphorin) 6A
SETD8	SET domain containing (lysine methyltransferase) 8
SEZ6	seizure related 6 homolog (mouse)
SFXN2	sideroflexin 2
SFXN3	sideroflexin 3
SGK494
SGOL1	shugoshin-like 1 (S. pombe)
SGOL2	shugoshin-like 2 (S. pombe)
SGPP1	sphingosine-1-phosphate phosphatase 1
SH3GL1	SH3-domain GRB2-like 1
SH3KBP1	SH3-domain kinase binding protein 1
SHCBP1	SHC SH2-domain binding protein 1
SHKBP1	SH3KBP1 binding protein 1
SHMT1	serine hydroxymethyltransferase 1 (soluble)
SHMT2	serine hydroxymethyltransferase 2 (mitochondrial)
SIRT1	sirtuin (silent mating type information regulation 2 homolog) 1 (S. cerevisiae)
SIVA1
SKA1
SKA2
SKA3
SKP2	S-phase kinase-associated protein 2 (p45)
SLC12A2	solute carrier family 12 (sodium/potassium/chloride transporters), member 2
SLC16A1	solute carrier family 16, member 1 (monocarboxylic acid transporter 1)
SLC16A14	solute carrier family 16, member 14 (monocarboxylic acid transporter 14)
SLC18A1	solute carrier family 18 (vesicular monoamine), member 1
SLC19A2	solute carrier family 19 (thiamine transporter), member 2
SLC1A3	solute carrier family 1 (glial high affinity glutamate transporter), member 3
SLC1A4	solute carrier family 1 (glutamate/neutral amino acid transporter), member 4
SLC1A5	solute carrier family 1 (neutral amino acid transporter), member 5
SLC25A12	solute carrier family 25 (mitochondrial carrier, Aralar), member 12
SLC25A13	solute carrier family 25, member 13 (citrin)
SLC25A19	solute carrier family 25 (mitochondrial deoxynucleotide carrier), member 19
SLC29A1	solute carrier family 29 (nucleoside transporters), member 1
SLC2A1	solute carrier family 2 (facilitated glucose transporter), member 1
SLC2A13	solute carrier family 2 (facilitated glucose transporter), member 13
SLC30A6	solute carrier family 30 (zinc transporter), member 6
SLC35A4	solute carrier family 35, member A4
SLC37A4	solute carrier family 37 (glycerol-6-phosphate transporter), member 4
SLC39A1	solute carrier family 39 (zinc transporter), member 1
SLC39A8	solute carrier family 39 (zinc transporter), member 8
SLC44A1	solute carrier family 44, member 1
SLC48A1
SLC6A15	solute carrier family 6, member 15
SLC7A1	solute carrier family 7 (cationic amino acid transporter, y+ system), member 1
SLC7A5	solute carrier family 7 (cationic amino acid transporter, y+ system), member 5
SLC7A6OS	solute carrier family 7, member 6 opposite strand
SLC8A1	solute carrier family 8 (sodium/calcium exchanger), member 1
SLC9A3R1	solute carrier family 9 (sodium/hydrogen exchanger), member 3 regulator 1
SLCO4A1	solute carrier organic anion transporter family, member 4A1
SLIT2	slit homolog 2 (Drosophila)
SLITRK1	SLIT and NTRK-like family, member 1
SLITRK5	SLIT and NTRK-like family, member 5
SMAD4	SMAD, mothers against DPP homolog 4 (Drosophila)
SMC2	structural maintenance of chromosomes 2
SMC4	structural maintenance of chromosomes 4
SMCR7L	Smith-Magenis syndrome chromosome region, candidate 7-like
SMPD1	sphingomyelin phosphodiesterase 1, acid lysosomal (acid sphingomyelinase)
SMTNL2	smoothelin-like 2
SNAI2	snail homolog 2 (Drosophila)
SNCA	synuclein, alpha (non A4 component of amyloid precursor)
SNF8	SNF8, ESCRT-II complex subunit, homolog (S. cerevisiae)
SNHG1	small nucleolar RNA host gene (non-protein coding) 1
SNHG3	small nucleolar RNA host gene (non-protein coding) 3
SNHG7	small nucleolar RNA host gene (non-protein coding) 7
SNRNP25
SNRNP48
SNX12	sorting nexin 12
SNX15	sorting nexin 15
SNX5	sorting nexin 5
SOAT1	sterol O-acyltransferase (acyl-Coenzyme A: cholesterol acyltransferase) 1
SOX2	SRY (sex determining region Y)-box 2
SOX7	SRY (sex determining region Y)-box 7
SP3	Sp3 transcription factor
SPAG5	sperm associated antigen 5
SPARC	secreted protein, acidic, cysteine-rich (osteonectin)
SPATA18	spermatogenesis associated 18 homolog (rat)
SPATA5	spermatogenesis associated 5
SPC24
SPC25
SPG20	spastic paraplegia 20, spartin (Troyer syndrome)
SPOCK3	sparc/osteonectin, cwcv and kazal-like domains proteoglycan (testican) 3
SPSB4	splA/ryanodine receptor domain and SOCS box containing 4
SRGAP2	SLIT-ROBO Rho GTPase activating protein 2
SRGAP2P1
SRM	spermidine synthase
SRSF2IP
SSFA2	sperm specific antigen 2
SST	somatostatin
STAG1	stromal antigen 1
STC2	stanniocalcin 2
STIL	SCL/TAL1 interrupting locus
STMN1	stathmin 1/oncoprotein 18
SURF4	surfeit 4
SUV39H1	suppressor of variegation 3-9 homolog 1 (Drosophila)
SUV39H2	suppressor of variegation 3-9 homolog 2 (Drosophila)
SVIP
SWAP70	-
SYNCRIP	synaptotagmin binding, cytoplasmic RNA interacting protein
SYT1	synaptotagmin I
SYT4	synaptotagmin IV
TACC1	transforming, acidic coiled-coil containing protein 1
TACC3	transforming, acidic coiled-coil containing protein 3
TAF15	TAF15 RNA polymerase II, TATA box binding protein (TBP)-associated factor, 68kDa
TAF3	TAF3 RNA polymerase II, TATA box binding protein (TBP)-associated factor, 140kDa
TAF5	TAF5 RNA polymerase II, TATA box binding protein (TBP)-associated factor, 100kDa
TARDBP	TAR DNA binding protein
TATDN2	TatD DNase domain containing 2
TAX1BP3	Tax1 (human T-cell leukemia virus type I) binding protein 3
TBC1D12	TBC1 domain family, member 12
TBL1XR1	transducin (beta)-like 1X-linked receptor 1
TCF19	transcription factor 19 (SC1)
TDP1	tyrosyl-DNA phosphodiesterase 1
TET1
TEX10	testis expressed sequence 10
TEX15	testis expressed sequence 15
TEX19
TGFBRAP1	transforming growth factor, beta receptor associated protein 1
TGIF2	TGFB-induced factor 2 (TALE family homeobox)
TGS1
TH	tyrosine hydroxylase
TIFA	-
TIMELESS	timeless homolog (Drosophila)
TIMM10	translocase of inner mitochondrial membrane 10 homolog (yeast)
TIPIN	TIMELESS interacting protein
TK1	thymidine kinase 1, soluble
TKT	transketolase (Wernicke-Korsakoff syndrome)
TLE1	transducin-like enhancer of split 1 (E(sp1) homolog, Drosophila)
TLE2	transducin-like enhancer of split 2 (E(sp1) homolog, Drosophila)
TLE3	transducin-like enhancer of split 3 (E(sp1) homolog, Drosophila)
TLE6	transducin-like enhancer of split 6 (E(sp1) homolog, Drosophila)
TLN2	talin 2
TM7SF3	transmembrane 7 superfamily member 3
TMED4	transmembrane emp24 protein transport domain containing 4
TMED5	transmembrane emp24 protein transport domain containing 5
TMEFF2	transmembrane protein with EGF-like and two follistatin-like domains 2
TMEM100	transmembrane protein 100
TMEM109	transmembrane protein 109
TMEM133	transmembrane protein 133
TMEM180	transmembrane protein 180
TMEM194A
TMEM20	transmembrane protein 20
TMEM200A
TMEM201
TMEM33	transmembrane protein 33
TMEM38B	transmembrane protein 38B
TMEM45A	transmembrane protein 45A
TMEM48	transmembrane protein 48
TMEM70	transmembrane protein 70
TMEM88	transmembrane protein 88
TMEM97	transmembrane protein 97
TMEM98	transmembrane protein 98
TMF1	TATA element modulatory factor 1
TMPO	thymopoietin
TMSB15A
TMTC3	transmembrane and tetratricopeptide repeat containing 3
TMUB1	transmembrane and ubiquitin-like domain containing 1
TNFAIP8	tumor necrosis factor, alpha-induced protein 8
TNNT2	troponin T type 2 (cardiac)
TOP2A	topoisomerase (DNA) II alpha 170kDa
TOPBP1	topoisomerase (DNA) II binding protein 1
TPD52	tumor protein D52
TPX2	TPX2, microtubule-associated, homolog (Xenopus laevis)
TRAC	T cell receptor alpha constant
TRAF4	TNF receptor-associated factor 4
TRAM2	translocation associated membrane protein 2
TRIM13	tripartite motif-containing 13
TRIM14	tripartite motif-containing 14
TRIM29	tripartite motif-containing 29
TRIM32	tripartite motif-containing 32
TRIM59	tripartite motif-containing 59
TRIP13	thyroid hormone receptor interactor 13
TRMT5	TRM5 tRNA methyltransferase 5 homolog (S. cerevisiae)
TROAP	trophinin associated protein (tastin)
TRPM7	transient receptor potential cation channel, subfamily M, member 7
TSEN15
TSN	translin
TSPAN14	tetraspanin 14
TSPAN18	tetraspanin 18
TTF2	transcription termination factor, RNA polymerase II
TTI1
TTK	TTK protein kinase
TTLL4	tubulin tyrosine ligase-like family, member 4
TTYH3	tweety homolog 3 (Drosophila)
TUBD1	tubulin, delta 1
TUFT1	tuftelin 1
TUSC1	tumor suppressor candidate 1
TYMS	thymidylate synthetase
UBE2C	ubiquitin-conjugating enzyme E2C
UBE2L3	ubiquitin-conjugating enzyme E2L 3
UBE2T	ubiquitin-conjugating enzyme E2T (putative)
UBIAD1	UbiA prenyltransferase domain containing 1
UBOX5	U-box domain containing 5
UBP1	upstream binding protein 1 (LBP-1a)
UGGT2
UHRF1	ubiquitin-like, containing PHD and RING finger domains, 1
UNG	uracil-DNA glycosylase
UROS	uroporphyrinogen III synthase (congenital erythropoietic porphyria)
USP1	ubiquitin specific peptidase 1
USP13	ubiquitin specific peptidase 13 (isopeptidase T-3)
USP25	ubiquitin specific peptidase 25
USP28	ubiquitin specific peptidase 28
USP31	ubiquitin specific peptidase 31
USP37	ubiquitin specific peptidase 37
USP39	ubiquitin specific peptidase 39
UTP23
VAPA	VAMP (vesicle-associated membrane protein)-associated protein A, 33kDa
VAX2	ventral anterior homeobox 2
VCAN
VCL	vinculin
VOPP1
VPS37B	vacuolar protein sorting 37 homolog B (S. cerevisiae)
VPS4A	vacuolar protein sorting 4 homolog A (S. cerevisiae)
VRK1	vaccinia related kinase 1
VRK2	vaccinia related kinase 2
VTI1B	vesicle transport through interaction with t-SNAREs homolog 1B (yeast)
WDHD1	WD repeat and HMG-box DNA binding protein 1
WDR34	WD repeat domain 34
WDR67	WD repeat domain 67
WDR76	WD repeat domain 76
WDYHV1
WEE1	WEE1 homolog (S. pombe)
WHSC1	Wolf-Hirschhorn syndrome candidate 1
WNK1	WNK lysine deficient protein kinase 1
XBP1	X-box binding protein 1
XK	X-linked Kx blood group (McLeod syndrome)
XPNPEP3	X-prolyl aminopeptidase (aminopeptidase P) 3, putative
XPO1	exportin 1 (CRM1 homolog, yeast)
XRCC6	X-ray repair complementing defective repair in Chinese hamster cells 6 (Ku autoantigen, 70kDa)
XRCC6BP1	XRCC6 binding protein 1
YARS	tyrosyl-tRNA synthetase
YKT6	YKT6 v-SNARE homolog (S. cerevisiae)
ZAK	-
ZC3H13	zinc finger CCCH-type containing 13
ZCCHC24
ZDHHC16	zinc finger, DHHC-type containing 16
ZFPM2	zinc finger protein, multitype 2
ZFYVE16	zinc finger, FYVE domain containing 16
ZNF114	zinc finger protein 114
ZNF207	zinc finger protein 207
ZNF239	zinc finger protein 239
ZNF273	zinc finger protein 273
ZNF280B
ZNF367	zinc finger protein 367
ZNF395	zinc finger protein 395
ZNF503	zinc finger protein 503
ZNF519	zinc finger protein 519
ZNF592	zinc finger protein 592
ZNF783	zinc finger protein 783
ZNF789	zinc finger protein 789
ZNF826P
ZNRF3	zinc and ring finger 3
ZWINT	ZW10 interactor

## Sheet: Up by miR-34c
original id	description
MARCHF2	membrane associated ring-CH-type finger 2
MARCHF4	membrane associated ring-CH-type finger 4
MARCHF9	membrane associated ring-CH-type finger 9
SEPTIN11	septin 11
SEPTIN8	septin 8
A1BG	alpha-1-B glycoprotein
ABAT	4-aminobutyrate aminotransferase
ABCF3	ATP-binding cassette, sub-family F (GCN20), member 3
ABLIM2	actin binding LIM protein family, member 2
ACADSB	acyl-Coenzyme A dehydrogenase, short/branched chain
ACAP3
ACTR1B	ARP1 actin-related protein 1 homolog B, centractin beta (yeast)
ACVR2A	activin A receptor, type IIA
ACYP2	acylphosphatase 2, muscle type
ADAM22	ADAM metallopeptidase domain 22
ADAMTS13	ADAM metallopeptidase with thrombospondin type 1 motif, 13
ADD1	adducin 1 (alpha)
ADD2	adducin 2 (beta)
ADSSL1	adenylosuccinate synthase like 1
AGPAT4	1-acylglycerol-3-phosphate O-acyltransferase 4 (lysophosphatidic acid acyltransferase, delta)
AGTPBP1	ATP/GTP binding protein 1
AGXT2L2	alanine-glyoxylate aminotransferase 2-like 2
AHI1	Abelson helper integration site 1
AHNAK	AHNAK nucleoprotein (desmoyokin)
AHSA2	AHA1, activator of heat shock 90kDa protein ATPase homolog 2 (yeast)
AK7	adenylate kinase 7
AKD1
AKT3	v-akt murine thymoma viral oncogene homolog 3 (protein kinase B, gamma)
ALS2CR8	amyotrophic lateral sclerosis 2 (juvenile) chromosome region, candidate 8
AMN1
ANGPT2	angiopoietin 2
ANK1	ankyrin 1, erythrocytic
ANKMY2	ankyrin repeat and MYND domain containing 2
ANKRA2	ankyrin repeat, family A (RFXANK-like), 2
ANKRD16	ankyrin repeat domain 16
ANKRD26	ankyrin repeat domain 26
ANKRD33B
ANKRD44	ankyrin repeat domain 44
ANKRD46	ankyrin repeat domain 46
ANKRD5	ankyrin repeat domain 5
ANKRD6	ankyrin repeat domain 6
ANKZF1	ankyrin repeat and zinc finger domain containing 1
ANO3
AP2A2	adaptor-related protein complex 2, alpha 2 subunit
AP4M1	adaptor-related protein complex 4, mu 1 subunit
APH1B	anterior pharynx defective 1 homolog B (C. elegans)
APOL2	apolipoprotein L, 2
APOOL
APPBP2	amyloid beta precursor protein (cytoplasmic tail) binding protein 2
AQP11	aquaporin 11
ARC	activity-regulated cytoskeleton-associated protein
ARFGAP2
ARFIP1	ADP-ribosylation factor interacting protein 1 (arfaptin 1)
ARHGAP18	Rho GTPase activating protein 18
ARHGAP26	Rho GTPase activating protein 26
ARHGEF7	Rho guanine nucleotide exchange factor (GEF) 7
ARID3B	AT rich interactive domain 3B (BRIGHT- like)
ARL2BP	ADP-ribosylation factor-like 2 binding protein
ARL4C	ADP-ribosylation factor-like 4C
ARL8A	ADP-ribosylation factor-like 8A
ARMC9	armadillo repeat containing 9
ARMCX3	armadillo repeat containing, X-linked 3
ARRDC4	arrestin domain containing 4
ARSD	arylsulfatase D
ASL	argininosuccinate lyase
ATAT1
ATCAY	ataxia, cerebellar, Cayman type (caytaxin)
ATG10	ATG10 autophagy related 10 homolog (S. cerevisiae)
ATP11A	ATPase, Class VI, type 11A
ATP1A1OS
ATP5F1	ATP synthase, H+ transporting, mitochondrial F0 complex, subunit B1
ATP6AP1	ATPase, H+ transporting, lysosomal accessory protein 1
ATP6AP1L
ATP6V1G1	ATPase, H+ transporting, lysosomal 13kDa, V1 subunit G1
ATP9A	ATPase, Class II, type 9A
ATPAF2	ATP synthase mitochondrial F1 complex assembly factor 2
ATRN	attractin
B3GALT2	UDP-Gal:betaGlcNAc beta 1,3-galactosyltransferase, polypeptide 2
B3GNTL1	UDP-GlcNAc:betaGal beta-1,3-N-acetylglucosaminyltransferase-like 1
B9D1
BACH2	BTB and CNC homology 1, basic leucine zipper transcription factor 2
BAIAP2	BAI1-associated protein 2
BBS12
BBS2	Bardet-Biedl syndrome 2
BBS9
BCAN	brevican
BCAP29	B-cell receptor-associated protein 29
BCR	breakpoint cluster region
BDNF	brain-derived neurotrophic factor
BEND5
BICD1	bicaudal D homolog 1 (Drosophila)
BIK	BCL2-interacting killer (apoptosis-inducing)
BLCAP	bladder cancer associated protein
BMP2K	BMP2 inducible kinase
BNIP3L	BCL2/adenovirus E1B 19kDa interacting protein 3-like
BPHL	biphenyl hydrolase-like (serine hydrolase; breast epithelial mucin-associated antigen)
BRAP	BRCA1 associated protein
BRSK1	BR serine/threonine kinase 1
BRSK2	BR serine/threonine kinase 2
BRWD1	bromodomain and WD repeat domain containing 1
BSDC1	BSD domain containing 1
BTBD9	BTB (POZ) domain containing 9
BTG1	B-cell translocation gene 1, anti-proliferative
C10ORF118	chromosome 10 open reading frame 118
C10ORF125	chromosome 10 open reading frame 125
C10ORF32	chromosome 10 open reading frame 32
C10ORF46	chromosome 10 open reading frame 46
C10ORF57	chromosome 10 open reading frame 57
C10ORF90	chromosome 10 open reading frame 90
C10ORF93	chromosome 10 open reading frame 93
C11ORF65	chromosome 11 open reading frame 65
C11ORF70	chromosome 11 open reading frame 70
C11ORF95
C12ORF55	chromosome 12 open reading frame 55
C12ORF68
C12ORF76
C14ORF159	chromosome 14 open reading frame 159
C14ORF179	chromosome 14 open reading frame 179
C14ORF39	chromosome 14 open reading frame 39
C14ORF45	chromosome 14 open reading frame 45
C14ORF79	chromosome 14 open reading frame 79
C15ORF17	chromosome 15 open reading frame 17
C15ORF37	chromosome 15 open reading frame 37
C15ORF57
C16ORF46	chromosome 16 open reading frame 46
C16ORF52	chromosome 16 open reading frame 52
C16ORF55	chromosome 16 open reading frame 55
C16ORF68	chromosome 16 open reading frame 68
C16ORF72	chromosome 16 open reading frame 72
C16ORF74	chromosome 16 open reading frame 74
C16ORF93
C17ORF103
C17ORF58	chromosome 17 open reading frame 58
C17ORF90
C17ORF91
C17ORF97
C18ORF32
C19ORF12	chromosome 19 open reading frame 12
C19ORF20	chromosome 19 open reading frame 20
C19ORF30	chromosome 19 open reading frame 30
C19ORF63
C1ORF114	chromosome 1 open reading frame 114
C1ORF230
C1ORF25	chromosome 1 open reading frame 25
C1ORF97	chromosome 1 open reading frame 97
C20ORF12	chromosome 20 open reading frame 12
C20ORF194	chromosome 20 open reading frame 194
C20ORF195	chromosome 20 open reading frame 195
C21ORF119	chromosome 21 open reading frame 119
C22ORF9	chromosome 22 open reading frame 9
C2ORF39	chromosome 2 open reading frame 39
C2ORF67
C2ORF74
C2ORF77
C3ORF23	chromosome 3 open reading frame 23
C4ORF34	chromosome 4 open reading frame 34
C5ORF36
C5ORF41
C6ORF120	chromosome 6 open reading frame 120
C6ORF124	chromosome 6 open reading frame 124
C6ORF154	chromosome 6 open reading frame 154
C6ORF165	chromosome 6 open reading frame 165
C6ORF168	chromosome 6 open reading frame 168
C6ORF170	chromosome 6 open reading frame 170
C6ORF225
C6ORF52	chromosome 6 open reading frame 52
C6ORF57	chromosome 6 open reading frame 57
C6ORF70	chromosome 6 open reading frame 70
C7	complement component 7
C7ORF31	chromosome 7 open reading frame 31
C7ORF63
C8ORF31	chromosome 8 open reading frame 31
C8ORF42	chromosome 8 open reading frame 42
C8ORF48	chromosome 8 open reading frame 48
C8ORF50	chromosome 8 open reading frame 50
C9ORF103	chromosome 9 open reading frame 103
C9ORF116	chromosome 9 open reading frame 116
C9ORF119	chromosome 9 open reading frame 119
C9ORF130	chromosome 9 open reading frame 130
C9ORF135	chromosome 9 open reading frame 135
C9ORF150	chromosome 9 open reading frame 150
C9ORF46	chromosome 9 open reading frame 46
C9ORF9	chromosome 9 open reading frame 9
C9ORF95	chromosome 9 open reading frame 95
C9ORF98	chromosome 9 open reading frame 98
CAB39L	calcium binding protein 39-like
CACNA1B	calcium channel, voltage-dependent, L type, alpha 1B subunit
CACNA2D3	calcium channel, voltage-dependent, alpha 2/delta 3 subunit
CADM4
CADPS	Ca2+-dependent secretion activator
CALY
CAMK1D	calcium/calmodulin-dependent protein kinase ID
CAMKK2	calcium/calmodulin-dependent protein kinase kinase 2, beta
CAMTA1	calmodulin binding transcription activator 1
CAP2	CAP, adenylate cyclase-associated protein, 2 (yeast)
CAPRIN1
CASC1	cancer susceptibility candidate 1
CASD1	CAS1 domain containing 1
CASP3	caspase 3, apoptosis-related cysteine peptidase
CBY1
CCDC104	coiled-coil domain containing 104
CCDC112	coiled-coil domain containing 112
CCDC113	coiled-coil domain containing 113
CCDC121	coiled-coil domain containing 121
CCDC123	coiled-coil domain containing 123
CCDC151
CCDC153
CCDC157
CCDC40	coiled-coil domain containing 40
CCDC53	coiled-coil domain containing 53
CCDC65	coiled-coil domain containing 65
CCDC78	coiled-coil domain containing 78
CCDC96	coiled-coil domain containing 96
CCNG2	cyclin G2
CCNL2	cyclin L2
CCNT2	cyclin T2
CCT6B	chaperonin containing TCP1, subunit 6B (zeta 2)
CD44	CD44 molecule (Indian blood group)
CD47	CD47 molecule
CD59	CD59 molecule, complement regulatory protein
CDC37L1	CDC37 cell division cycle 37 homolog (S. cerevisiae)-like 1
CDK10	cyclin-dependent kinase (CDC2-like) 10
CDK12
CDK16
CDK20
CDK5R1	cyclin-dependent kinase 5, regulatory subunit 1 (p35)
CDKL3	cyclin-dependent kinase-like 3
CDNF
CDRT4	CMT1A duplicated region transcript 4
CECR6	cat eye syndrome chromosome region, candidate 6
CELF3
CELF4
CELF5
CEP164	centrosomal protein 164kDa
CEP290	centrosomal protein 290kDa
CEP97
CETN2	centrin, EF-hand protein, 2
CHGB	chromogranin B (secretogranin 1)
CHKB	choline kinase beta
CHM	choroideremia (Rab escort protein 1)
CHN2	chimerin (chimaerin) 2
CHODL	chondrolectin
CHP	-
CHPF2
CHRM3	cholinergic receptor, muscarinic 3
CLCN3	chloride channel 3
CLCN5	chloride channel 5 (nephrolithiasis 2, X-linked, Dent disease)
CLIP1
CLIP3
CLIP4
CLN8	ceroid-lipofuscinosis, neuronal 8 (epilepsy, progressive with mental retardation)
CLUAP1	clusterin associated protein 1
CLVS1
CLYBL	citrate lyase beta like
CMPK1
CNGB1	cyclic nucleotide gated channel beta 1
COG5	component of oligomeric golgi complex 5
COL5A2	collagen, type V, alpha 2
COL6A1	collagen, type VI, alpha 1
COPA	coatomer protein complex, subunit alpha
COPG2	coatomer protein complex, subunit gamma 2
COPZ1	coatomer protein complex, subunit zeta 1
CORO2B	coronin, actin binding protein, 2B
COX7B	cytochrome c oxidase subunit VIIb
COX8C	cytochrome c oxidase subunit 8C
CPEB3	cytoplasmic polyadenylation element binding protein 3
CPEB4	cytoplasmic polyadenylation element binding protein 4
CPPED1
CPT1A	carnitine palmitoyltransferase 1A (liver)
CPT1C	carnitine palmitoyltransferase 1C
CPT2	carnitine palmitoyltransferase II
CREB5	cAMP responsive element binding protein 5
CREBL2	cAMP responsive element binding protein-like 2
CRH	corticotropin releasing hormone
CSAD	cysteine sulfinic acid decarboxylase
CSNK1D	casein kinase 1, delta
CSRNP3
CST3	cystatin C (amyloid angiopathy and cerebral hemorrhage)
CTSO	cathepsin O
CUL4B	cullin 4B
CUL7	cullin 7
CXADR	coxsackie virus and adenovirus receptor
CXCR4	chemokine (C-X-C motif) receptor 4
CXORF23	chromosome X open reading frame 23
CYB5D1	cytochrome b5 domain containing 1
CYB5D2	cytochrome b5 domain containing 2
CYB5R1	cytochrome b5 reductase 1
CYFIP2	cytoplasmic FMR1 interacting protein 2
CYLD	cylindromatosis (turban tumor syndrome)
CYTH2
D4S234E	-
DALRD3	DALR anticodon binding domain containing 3
DAZAP2	DAZ associated protein 2
DCAF10
DCAF5
DCLK1
DCLK2
DDAH1	dimethylarginine dimethylaminohydrolase 1
DDAH2	dimethylarginine dimethylaminohydrolase 2
DDR2	discoidin domain receptor family, member 2
DENND2A	DENN/MADD domain containing 2A
DENND5B
DFNA5	deafness, autosomal dominant 5
DFNB59	deafness, autosomal recessive 59
DGKB	diacylglycerol kinase, beta 90kDa
DGKQ	diacylglycerol kinase, theta 110kDa
DHDPSL
DHRS12	dehydrogenase/reductase (SDR family) member 12
DIP2C	DIP2 disco-interacting protein 2 homolog C (Drosophila)
DIRAS2	DIRAS family, GTP-binding RAS-like 2
DKK3	dickkopf homolog 3 (Xenopus laevis)
DLG2	discs, large homolog 2, chapsyn-110 (Drosophila)
DLGAP4	discs, large (Drosophila) homolog-associated protein 4
DLX5	distal-less homeobox 5
DNAH5	dynein, axonemal, heavy chain 5
DNAJB2	DnaJ (Hsp40) homolog, subfamily B, member 2
DNAJB5	DnaJ (Hsp40) homolog, subfamily B, member 5
DNAJC27
DNAJC30
DNAJC4	DnaJ (Hsp40) homolog, subfamily C, member 4
DNAL1	dynein, axonemal, light chain 1
DNALI1	dynein, axonemal, light intermediate chain 1
DNM3	dynamin 3
DOCK4	dedicator of cytokinesis 4
DOCK7	dedicator of cytokinesis 7
DOK6	docking protein 6
DPCD
DPYSL3	dihydropyrimidinase-like 3
DPYSL5	dihydropyrimidinase-like 5
DRAM1
DSCAML1	Down syndrome cell adhesion molecule like 1
DUSP1	dual specificity phosphatase 1
DUSP16	dual specificity phosphatase 16
DUSP18	dual specificity phosphatase 18
DUSP4	dual specificity phosphatase 4
DUSP6	dual specificity phosphatase 6
DYNC1I1	dynein, cytoplasmic 1, intermediate chain 1
DYNC2H1	dynein, cytoplasmic 2, heavy chain 1
DYNC2LI1	dynein, cytoplasmic 2, light intermediate chain 1
DYX1C1	dyslexia susceptibility 1 candidate 1
DZIP3	-
EBF1	early B-cell factor 1
EDEM1	ER degradation enhancer, mannosidase alpha-like 1
EFCAB2	EF-hand calcium binding domain 2
EFCAB6
EFHA2	EF-hand domain family, member A2
EFHC1	EF-hand domain (C-terminal) containing 1
EFNB3	ephrin-B3
EGR1	early growth response 1
EHD1	EH-domain containing 1
EHD3	EH-domain containing 3
EIF2C2	eukaryotic translation initiation factor 2C, 2
EIF2C4	eukaryotic translation initiation factor 2C, 4
EIF4E3	eukaryotic translation initiation factor 4E member 3
ELAC1	elaC homolog 1 (E. coli)
ELAVL1	ELAV (embryonic lethal, abnormal vision, Drosophila)-like 1 (Hu antigen R)
ELAVL2	ELAV (embryonic lethal, abnormal vision, Drosophila)-like 2 (Hu antigen B)
ELAVL3	ELAV (embryonic lethal, abnormal vision, Drosophila)-like 3 (Hu antigen C)
ELAVL4	ELAV (embryonic lethal, abnormal vision, Drosophila)-like 4 (Hu antigen D)
ELFN1
EME2	essential meiotic endonuclease 1 homolog 2 (S. pombe)
EML2	echinoderm microtubule associated protein like 2
EML4	echinoderm microtubule associated protein like 4
EML6
ENKUR
ENPP2	ectonucleotide pyrophosphatase/phosphodiesterase 2 (autotaxin)
ENSA	endosulfine alpha
ENTPD3	ectonucleoside triphosphate diphosphohydrolase 3
ENTPD7	ectonucleoside triphosphate diphosphohydrolase 7
EPB41L1	erythrocyte membrane protein band 4.1-like 1
EPB41L5	erythrocyte membrane protein band 4.1 like 5
EPCAM
EPHA5	EPH receptor A5
ERCC2	excision repair cross-complementing rodent repair deficiency, complementation group 2 (xeroderma pigmentosum D)
ERLIN2
ETS2	v-ets erythroblastosis virus E26 oncogene homolog 2 (avian)
ETV4	ets variant gene 4 (E1A enhancer binding protein, E1AF)
EXOC1	exocyst complex component 1
EXOC7	exocyst complex component 7
EXT1	exostoses (multiple) 1
FADS3	fatty acid desaturase 3
FAM114A1	family with sequence similarity 114, member A1
FAM116B	family with sequence similarity 116, member B
FAM117B
FAM134B
FAM13A
FAM149B1
FAM160B1
FAM164C
FAM165B
FAM184A
FAM18B1
FAM190B
FAM20C	family with sequence similarity 20, member C
FAM63B	family with sequence similarity 63, member B
FAM78B	family with sequence similarity 78, member B
FAM89A	family with sequence similarity 89, member A
FAN1
FBLIM1	filamin binding LIM protein 1
FBP1	fructose-1,6-bisphosphatase 1
FBXO16	F-box protein 16
FBXO28	F-box protein 28
FBXO31	F-box protein 31
FBXO36	F-box protein 36
FBXW9	F-box and WD-40 domain protein 9
FGD4	FYVE, RhoGEF and PH domain containing 4
FGF14	fibroblast growth factor 14
FGF20	fibroblast growth factor 20
FHOD3	formin homology 2 domain containing 3
FIG4
FILIP1	filamin A interacting protein 1
FILIP1L
FKRP	fukutin related protein
FLCN	folliculin
FLJ20464	-
FLJ22536	-
FLJ27352	-
FLJ35220	-
FLJ35390	-
FLJ39051	-
FLJ42418	-
FLJ43663	-
FLJ90757	-
FLNA	filamin A, alpha (actin binding protein 280)
FLNB	filamin B, beta (actin binding protein 278)
FMO1	flavin containing monooxygenase 1
FNBP1	formin binding protein 1
FOS	v-fos FBJ murine osteosarcoma viral oncogene homolog
FRAT1	frequently rearranged in advanced T-cell lymphomas
FRMD3	FERM domain containing 3
FRMD4B	FERM domain containing 4B
FRMD5	FERM domain containing 5
FSD1L	fibronectin type III and SPRY domain containing 1-like
FUCA1	fucosidase, alpha-L- 1, tissue
FXR1	fragile X mental retardation, autosomal homolog 1
FYN	FYN oncogene related to SRC, FGR, YES
FZD3	frizzled homolog 3 (Drosophila)
FZD5	frizzled homolog 5 (Drosophila)
GAA	glucosidase, alpha; acid (Pompe disease, glycogen storage disease type II)
GAB2	GRB2-associated binding protein 2
GABBR1	gamma-aminobutyric acid (GABA) B receptor, 1
GAL	galanin
GALNT6	UDP-N-acetyl-alpha-D-galactosamine:polypeptide N-acetylgalactosaminyltransferase 6 (GalNAc-T6)
GARNL3	GTPase activating Rap/RanGAP domain-like 3
GATS	-
GDF11	growth differentiation factor 11
GDI1	GDP dissociation inhibitor 1
GDPD1	glycerophosphodiester phosphodiesterase domain containing 1
GEM	GTP binding protein overexpressed in skeletal muscle
GFOD2	glucose-fructose oxidoreductase domain containing 2
GFPT1	glutamine-fructose-6-phosphate transaminase 1
GGPS1	geranylgeranyl diphosphate synthase 1
GIT2	G protein-coupled receptor kinase interactor 2
GLB1L	galactosidase, beta 1-like
GLS	glutaminase
GLT25D2	glycosyltransferase 25 domain containing 2
GNAS	GNAS complex locus
GNG2	guanine nucleotide binding protein (G protein), gamma 2
GNG3	guanine nucleotide binding protein (G protein), gamma 3
GOLGA1	golgi autoantigen, golgin subfamily a, 1
GOLGA2	golgi autoantigen, golgin subfamily a, 2
GOLGA8A	golgi autoantigen, golgin subfamily a, 8A
GOLGA8H
GOLGB1	golgi autoantigen, golgin subfamily b, macrogolgin (with transmembrane signal), 1
GPATCH2
GPC2	glypican 2 (cerebroglycan)
GPER
GPR137C	G protein-coupled receptor 137C
GPR155	G protein-coupled receptor 155
GPR173	G protein-coupled receptor 173
GPR22	G protein-coupled receptor 22
GRAMD1B	GRAM domain containing 1B
GRHL1	grainyhead-like 1 (Drosophila)
GRIK2	glutamate receptor, ionotropic, kainate 2
GRIPAP1	GRIP1 associated protein 1
GRK4	G protein-coupled receptor kinase 4
GRK5	G protein-coupled receptor kinase 5
GSN	gelsolin (amyloidosis, Finnish type)
GTPBP2	GTP binding protein 2
GUCA1A	guanylate cyclase activator 1A (retina)
GULP1	GULP, engulfment adaptor PTB domain containing 1
HARBI1
HARS	histidyl-tRNA synthetase
HBP1	HMG-box transcription factor 1
HCFC2	host cell factor C2
HDAC11	histone deacetylase 11
HDAC4	histone deacetylase 4
HEXDC	hexosaminidase (glycosyl hydrolase family 20, catalytic domain) containing
HEXIM1	hexamethylene bis-acetamide inducible 1
HGSNAT	heparan-alpha-glucosaminide N-acetyltransferase
HINT3	histidine triad nucleotide binding protein 3
HIPK3	homeodomain interacting protein kinase 3
HIST1H2AC	histone cluster 1, H2ac
HIST1H2AE	histone cluster 1, H2ae
HIST1H2AK	histone cluster 1, H2ak
HIST1H2BC	histone cluster 1, H2bc
HIST1H2BG	histone cluster 1, H2bg
HIST1H3E	histone cluster 1, H3e
HIST1H3H	histone cluster 1, H3h
HIST1H4H	histone cluster 1, H4h
HIST2H2BE	histone cluster 2, H2be
HKR1	GLI-Kruppel family member HKR1
HMGCL	3-hydroxymethyl-3-methylglutaryl-Coenzyme A lyase (hydroxymethylglutaricaciduria)
HOMER2	homer homolog 2 (Drosophila)
HOMER3	homer homolog 3 (Drosophila)
HRK	harakiri, BCL2 interacting protein (contains only BH3 domain)
HS6ST3	heparan sulfate 6-O-sulfotransferase 3
HTRA2	HtrA serine peptidase 2
ICAM2	intercellular adhesion molecule 2
IDH3G	isocitrate dehydrogenase 3 (NAD+) gamma
IDS	iduronate 2-sulfatase (Hunter syndrome)
IER3	immediate early response 3
IFI16	interferon, gamma-inducible protein 16
IFNAR2	interferon (alpha, beta and omega) receptor 2
IFT27
IFT57	intraflagellar transport 57 homolog (Chlamydomonas)
IFT74	intraflagellar transport 74 homolog (Chlamydomonas)
IFT81	intraflagellar transport 81 homolog (Chlamydomonas)
IFT88	intraflagellar transport 88 homolog (Chlamydomonas)
IGFBP7	insulin-like growth factor binding protein 7
IGLON5
IL17RD	interleukin 17 receptor D
IL6ST	interleukin 6 signal transducer (gp130, oncostatin M receptor)
IMPACT	Impact homolog (mouse)
INPP4A	inositol polyphosphate-4-phosphatase, type I, 107kDa
INPP5E	inositol polyphosphate-5-phosphatase, 72 kDa
INSR	insulin receptor
INTU
IP6K2
IQCD	IQ motif containing D
IQCE	IQ motif containing E
IQCG	IQ motif containing G
IQCH	IQ motif containing H
IQCK	IQ motif containing K
IRF2	interferon regulatory factor 2
IRF6	interferon regulatory factor 6
IRF9
IRS2	insulin receptor substrate 2
ISG15	ISG15 ubiquitin-like modifier
ITGA1	integrin, alpha 1
ITGA6	integrin, alpha 6
ITGBL1	integrin, beta-like 1 (with EGF-like repeat domains)
ITSN1	intersectin 1 (SH3 domain protein)
IVD	isovaleryl Coenzyme A dehydrogenase
JAK1	Janus kinase 1 (a protein tyrosine kinase)
JAKMIP2	janus kinase and microtubule interacting protein 2
JAKMIP3
KAT2B
KATNAL1	katanin p60 subunit A-like 1
KCNAB1	potassium voltage-gated channel, shaker-related subfamily, beta member 1
KCNH8	potassium voltage-gated channel, subfamily H (eag-related), member 8
KCNJ2	potassium inwardly-rectifying channel, subfamily J, member 2
KCNMB4	potassium large conductance calcium-activated channel, subfamily M, beta member 4
KCNQ2	potassium voltage-gated channel, KQT-like subfamily, member 2
KCTD13	potassium channel tetramerisation domain containing 13
KCTD21	potassium channel tetramerisation domain containing 21
KDM4A
KDM5B
KDM6B
KHDRBS1	KH domain containing, RNA binding, signal transduction associated 1
KIAA0125	KIAA0125
KIAA0232	-
KIAA0408	KIAA0408
KIAA0513	KIAA0513
KIAA0562	KIAA0562
KIAA0649	KIAA0649
KIAA0753	KIAA0753
KIAA0895L
KIAA0913	KIAA0913
KIAA1024	-
KIAA1370	KIAA1370
KIAA1377	KIAA1377
KIAA1530	-
KIAA1549	-
KIAA1712	KIAA1712
KIAA1841	KIAA1841
KIAA1908	-
KIAA1919	KIAA1919
KIF13B	kinesin family member 13B
KIF1B	kinesin family member 1B
KIF3A	kinesin family member 3A
KIF3B	kinesin family member 3B
KIF3C	kinesin family member 3C
KIF5A	kinesin family member 5A
KIF5C	kinesin family member 5C
KIF9	kinesin family member 9
KIFAP3	kinesin-associated protein 3
KLC1
KLF9	Kruppel-like factor 9
KLHL24	kelch-like 24 (Drosophila)
KLHL28
KLHL36
KLHL7	kelch-like 7 (Drosophila)
KLRAQ1
KPNA5	karyopherin alpha 5 (importin alpha 6)
KRBA2	KRAB-A domain containing 2
KRCC1	lysine-rich coiled-coil 1
LACTB	lactamase, beta
LANCL1	LanC lantibiotic synthetase component C-like 1 (bacterial)
LAPTM5	lysosomal associated multispanning membrane protein 5
LARP6	La ribonucleoprotein domain family, member 6
LASS1	LAG1 homolog, ceramide synthase 1 (S. cerevisiae)
LCA5	Leber congenital amaurosis 5
LCOR	ligand dependent nuclear receptor corepressor
LCORL	ligand dependent nuclear receptor corepressor-like
LEPR	leptin receptor
LEPREL2	leprecan-like 2
LEPROT	leptin receptor overlapping transcript
LETM2	leucine zipper-EF-hand containing transmembrane protein 2
LGALS3BP	lectin, galactoside-binding, soluble, 3 binding protein
LIG4	ligase IV, DNA, ATP-dependent
LIMK2	LIM domain kinase 2
LIN37
LIN7B	lin-7 homolog B (C. elegans)
LMF1
LMLN	leishmanolysin-like (metallopeptidase M8 family)
LMO2	LIM domain only 2 (rhombotin-like 1)
LMO4	LIM domain only 4
LOC100009676
LOC100125871
LOC100128239
LOC100128727
LOC100128737
LOC100134937
LOC100144603
LOC100272217
LOC100287331
LOC100287482
LOC100287896
LOC100288152
LOC100288617
LOC100289373
LOC100289410
LOC100379224
LOC100499467
LOC100505481
LOC100505490
LOC100505728
LOC100506019
LOC100506113
LOC100506174
LOC100506295
LOC100506696
LOC100506697
LOC100506701
LOC100506728
LOC100506781
LOC100506844
LOC100506966
LOC100506979
LOC100507039
LOC100507110
LOC100507186
LOC100507255
LOC100507265
LOC100507291
LOC100507297
LOC100507372
LOC100508125
LOC100508307
LOC100508546
LOC100509297
LOC100510093
LOC147670	-
LOC148189	-
LOC153546	-
LOC153682	-
LOC158960	-
LOC203274	-
LOC256021	-
LOC283454	-
LOC283484	-
LOC283788	-
LOC284373	-
LOC284408	-
LOC284440
LOC285286	-
LOC286071	-
LOC339803	-
LOC375190	-
LOC387647	-
LOC400236	-
LOC400604	-
LOC400684	-
LOC400692
LOC400756	-
LOC401176	-
LOC401233	-
LOC439911	-
LOC440104	-
LOC441617	-
LOC641467	-
LOC642852	-
LOC646934	-
LOC647979	-
LOC728190	-
LOC728485	-
LOC728613	-
LOC728730	-
LOC729013	-
LOC729570	-
LOC729723	-
LOH12CR2	loss of heterozygosity, 12, chromosomal region 2
LONP2
LONRF2	LON peptidase N-terminal domain and ring finger 2
LPPR3
LRCH3	leucine-rich repeats and calponin homology (CH) domain containing 3
LRGUK
LRPAP1	low density lipoprotein receptor-related protein associated protein 1
LRRC16A
LRRC23	leucine rich repeat containing 23
LRRC27	leucine rich repeat containing 27
LRRC4	leucine rich repeat containing 4
LRRC46	leucine rich repeat containing 46
LRRC48	leucine rich repeat containing 48
LRRC4C	leucine rich repeat containing 4C
LRRC8B	leucine rich repeat containing 8 family, member B
LRRFIP1	leucine rich repeat (in FLII) interacting protein 1
LRRN2
LRRTM2	leucine rich repeat transmembrane neuronal 2
LSAMP	limbic system-associated membrane protein
LTK	leukocyte tyrosine kinase
LYRM1	LYR motif containing 1
LZTFL1	leucine zipper transcription factor-like 1
MAFB	v-maf musculoaponeurotic fibrosarcoma oncogene homolog B (avian)
MAFF	v-maf musculoaponeurotic fibrosarcoma oncogene homolog F (avian)
MAFK	v-maf musculoaponeurotic fibrosarcoma oncogene homolog K (avian)
MALAT1	metastasis associated lung adenocarcinoma transcript 1 (non-coding RNA)
MAML2	mastermind-like 2 (Drosophila)
MAN1A2	mannosidase, alpha, class 1A, member 2
MAN1B1	mannosidase, alpha, class 1B, member 1
MAN2C1	mannosidase, alpha, class 2C, member 1
MAP1B	microtubule-associated protein 1B
MAP1LC3B	microtubule-associated protein 1 light chain 3 beta
MAP2K4	mitogen-activated protein kinase kinase 4
MAP3K1	mitogen-activated protein kinase kinase kinase 1
MAP3K12	mitogen-activated protein kinase kinase kinase 12
MAP3K13	mitogen-activated protein kinase kinase kinase 13
MAP4K4	mitogen-activated protein kinase kinase kinase kinase 4
MAP6	microtubule-associated protein 6
MAP9	microtubule-associated protein 9
MAPK10	mitogen-activated protein kinase 10
MAPK12	mitogen-activated protein kinase 12
MAPK8	mitogen-activated protein kinase 8
MAST1	microtubule associated serine/threonine kinase 1
MBNL2	muscleblind-like 2 (Drosophila)
MCAM	melanoma cell adhesion molecule
MCCC1	methylcrotonoyl-Coenzyme A carboxylase 1 (alpha)
MCF2L	MCF.2 cell line derived transforming sequence-like
MDH1B	malate dehydrogenase 1B, NAD (soluble)
MED17
METRNL	meteorin, glial cell differentiation regulator-like
MFSD10
MFSD6
MFSD9
MGC42105	-
MGEA5	meningioma expressed antigen 5 (hyaluronidase)
MIAT
MIB2	mindbomb homolog 2 (Drosophila)
MICAL1	microtubule associated monoxygenase, calponin and LIM domain containing 1
MKRN1	makorin, ring finger protein, 1
MLF1	myeloid leukemia factor 1
MORN2	MORN repeat containing 2
MOSPD3	motile sperm domain containing 3
MPG	N-methylpurine-DNA glycosylase
MRAP2
MRAS	muscle RAS oncogene homolog
MREG
MRS2
MT1F	metallothionein 1F (functional)
MT1X	metallothionein 1X
MTL5	metallothionein-like 5, testis-specific (tesmin)
MUDENG
MUM1	melanoma associated antigen (mutated) 1
MXD1	MAX dimerization protein 1
MXD4	MAX dimerization protein 4
MXRA8	matrix-remodelling associated 8
MYEOV	myeloma overexpressed gene (in a subset of t(11;14) positive multiple myelomas)
MYH15	myosin, heavy chain 15
MYL5	myosin, light chain 5, regulatory
MYST4	MYST histone acetyltransferase (monocytic leukemia) 4
MYT1	myelin transcription factor 1
MYT1L	myelin transcription factor 1-like
N4BP2L2
N6AMT1
NACAD
NAPB	N-ethylmaleimide-sensitive factor attachment protein, beta
NARG2	NMDA receptor regulated 2
NAT1	N-acetyltransferase 1 (arylamine N-acetyltransferase)
NAT14	N-acetyltransferase 14
NBAS
NBEA	neurobeachin
NCOA3	nuclear receptor coactivator 3
NCRNA00094
NCRNA00171
NCRNA00247
NCRNA00263
NDRG2	NDRG family member 2
NDRG4	NDRG family member 4
NDST2	N-deacetylase/N-sulfotransferase (heparan glucosaminyl) 2
NDUFS1	NADH dehydrogenase (ubiquinone) Fe-S protein 1, 75kDa (NADH-coenzyme Q reductase)
NECAB3
NEDD4L	neural precursor cell expressed, developmentally down-regulated 4-like
NEIL2	nei like 2 (E. coli)
NELF	nasal embryonic LHRH factor
NFYA	nuclear transcription factor Y, alpha
NHEDC1
NHLRC3
NINL
NIT1	nitrilase 1
NLK	nemo-like kinase
NME3	non-metastatic cells 3, protein expressed in
NME5	non-metastatic cells 5, protein expressed in (nucleoside-diphosphate kinase)
NMNAT2	nicotinamide nucleotide adenylyltransferase 2
NOX3	NADPH oxidase 3
NPHP1	nephronophthisis 1 (juvenile)
NPHP3	nephronophthisis 3 (adolescent)
NPR2	natriuretic peptide receptor B/guanylate cyclase B (atrionatriuretic peptide receptor B)
NRBP1	nuclear receptor binding protein 1
NRBP2	nuclear receptor binding protein 2
NRP1	neuropilin 1
NT5E	5'-nucleotidase, ecto (CD73)
NTRK1	neurotrophic tyrosine kinase, receptor, type 1
NUBPL	nucleotide binding protein-like
NUDT14	nudix (nucleoside diphosphate linked moiety X)-type motif 14
NUDT16	nudix (nucleoside diphosphate linked moiety X)-type motif 16
NUDT17	nudix (nucleoside diphosphate linked moiety X)-type motif 17
NUDT6	nudix (nucleoside diphosphate linked moiety X)-type motif 6
NUDT7	nudix (nucleoside diphosphate linked moiety X)-type motif 7
OAZ3	ornithine decarboxylase antizyme 3
ODF2	outer dense fiber of sperm tails 2
ODF2L	outer dense fiber of sperm tails 2-like
ODZ4	odz, odd Oz/ten-m homolog 4 (Drosophila)
OGDHL	oxoglutarate dehydrogenase-like
OGT	O-linked N-acetylglucosamine (GlcNAc) transferase (UDP-N-acetylglucosamine:polypeptide-N-acetylglucosaminyl transferase)
OPRM1	opioid receptor, mu 1
OPTN	optineurin
ORAI2
OSCP1
OSTM1	osteopetrosis associated transmembrane protein 1
OTUB2	OTU domain, ubiquitin aldehyde binding 2
OTUD1	OTU domain containing 1
OTUD5	OTU domain containing 5
P4HTM
PACRG	PARK2 co-regulated
PACRGL
PAFAH2	platelet-activating factor acetylhydrolase 2, 40kDa
PAK3	p21 (CDKN1A)-activated kinase 3
PALMD	palmdelphin
PANX1	pannexin 1
PARM1
PARP9	poly (ADP-ribose) polymerase family, member 9
PBLD
PBXIP1	pre-B-cell leukemia transcription factor interacting protein 1
PCDHA2	protocadherin alpha 2
PCDHB10	protocadherin beta 10
PCDHB13	protocadherin beta 13
PCDHB14	protocadherin beta 14
PCDHB15	protocadherin beta 15
PCDHB16	protocadherin beta 16
PCDHB18	protocadherin beta 18 pseudogene
PCDHB2	protocadherin beta 2
PCDHB3	protocadherin beta 3
PCDHB4	protocadherin beta 4
PCDHB6	protocadherin beta 6
PCDHB7	protocadherin beta 7
PCDP1
PCGF3	polycomb group ring finger 3
PCMTD1	protein-L-isoaspartate (D-aspartate) O-methyltransferase domain containing 1
PCNXL2	pecanex-like 2 (Drosophila)
PDE10A	phosphodiesterase 10A
PDE11A	phosphodiesterase 11A
PDE3B	phosphodiesterase 3B, cGMP-inhibited
PDLIM5	PDZ and LIM domain 5
PDP1
PEX11B	peroxisomal biogenesis factor 11B
PEX12	peroxisomal biogenesis factor 12
PEX19	peroxisomal biogenesis factor 19
PGAM2	phosphoglycerate mutase 2 (muscle)
PGAP1	-
PHLDA1	pleckstrin homology-like domain, family A, member 1
PHOSPHO2	phosphatase, orphan 2
PHTF1	putative homeodomain transcription factor 1
PI15	peptidase inhibitor 15
PIGC	phosphatidylinositol glycan anchor biosynthesis, class C
PIH1D2
PIK3IP1
PIK3R1	phosphoinositide-3-kinase, regulatory subunit 1 (p85 alpha)
PIK3R3	phosphoinositide-3-kinase, regulatory subunit 3 (p55, gamma)
PIP4K2C
PISD	phosphatidylserine decarboxylase
PITPNA	phosphatidylinositol transfer protein, alpha
PKHD1	polycystic kidney and hepatic disease 1 (autosomal recessive)
PKIB	protein kinase (cAMP-dependent, catalytic) inhibitor beta
PKIG	protein kinase (cAMP-dependent, catalytic) inhibitor gamma
PLAT	plasminogen activator, tissue
PLCL1	phospholipase C-like 1
PLCXD2	phosphatidylinositol-specific phospholipase C, X domain containing 2
PLCXD3	phosphatidylinositol-specific phospholipase C, X domain containing 3
PLD3	phospholipase D family, member 3
PLD5	phospholipase D family, member 5
PLEKHA3	pleckstrin homology domain containing, family A (phosphoinositide binding specific) member 3
PLEKHA6	pleckstrin homology domain containing, family A member 6
PLK2	polo-like kinase 2 (Drosophila)
PLK3	polo-like kinase 3 (Drosophila)
PLTP	phospholipid transfer protein
PMP22	peripheral myelin protein 22
PNMA2	paraneoplastic antigen MA2
PNMAL2
PNRC1	proline-rich nuclear receptor coactivator 1
POLD4	polymerase (DNA-directed), delta 4
POLI	polymerase (DNA directed) iota
POLR3GL	polymerase (RNA) III (DNA directed) polypeptide G (32kD) like
POMT1	protein-O-mannosyltransferase 1
PPAPDC1A	phosphatidic acid phosphatase type 2 domain containing 1A
PPAPDC1B	phosphatidic acid phosphatase type 2 domain containing 1B
PPAPDC2	phosphatidic acid phosphatase type 2 domain containing 2
PPARA	peroxisome proliferative activated receptor, alpha
PPARGC1A	peroxisome proliferative activated receptor, gamma, coactivator 1, alpha
PPCS	phosphopantothenoylcysteine synthetase
PPFIBP2	PTPRF interacting protein, binding protein 2 (liprin beta 2)
PPIL6	peptidylprolyl isomerase (cyclophilin)-like 6
PPL	periplakin
PPP1R15A	protein phosphatase 1, regulatory (inhibitor) subunit 15A
PPP1R16A	protein phosphatase 1, regulatory (inhibitor) subunit 16A
PPP1R9A	protein phosphatase 1, regulatory (inhibitor) subunit 9A
PPP2R1B	protein phosphatase 2 (formerly 2A), regulatory subunit A (PR 65), beta isoform
PPP2R5B	protein phosphatase 2, regulatory subunit B (B56), beta isoform
PPP3CB	protein phosphatase 3 (formerly 2B), catalytic subunit, beta isoform (calcineurin A beta)
PPP6R2
PRAF2	PRA1 domain family, member 2
PRDX5	peroxiredoxin 5
PREPL	prolyl endopeptidase-like
PRIC285	-
PRKAA1	protein kinase, AMP-activated, alpha 1 catalytic subunit
PRKCA	protein kinase C, alpha
PRKCH	protein kinase C, eta
PRKCZ	protein kinase C, zeta
PRLHR	prolactin releasing hormone receptor
PRMT2	protein arginine methyltransferase 2
PROM2	prominin 2
PRR7	proline rich 7 (synaptic)
PRSS12	protease, serine, 12 (neurotrypsin, motopsin)
PRTG	protogenin homolog (Gallus gallus)
PRUNE2
PSEN1	presenilin 1 (Alzheimer disease 3)
PSENEN	presenilin enhancer 2 homolog (C. elegans)
PSPH	phosphoserine phosphatase
PTN	pleiotrophin (heparin binding growth factor 8, neurite growth-promoting factor 1)
PTPRB	protein tyrosine phosphatase, receptor type, B
PTPRE	protein tyrosine phosphatase, receptor type, E
PTPRF	protein tyrosine phosphatase, receptor type, F
PTPRH	protein tyrosine phosphatase, receptor type, H
PTPRN2	protein tyrosine phosphatase, receptor type, N polypeptide 2
PTPRR	protein tyrosine phosphatase, receptor type, R
PWWP2B
PXDN	peroxidasin homolog (Drosophila)
QDPR	quinoid dihydropteridine reductase
QSOX1
RAB11FIP4	RAB11 family interacting protein 4 (class II)
RAB2B	RAB2B, member RAS oncogene family
RAB36	RAB36, member RAS oncogene family
RAB39B	RAB39B, member RAS oncogene family
RAB3D	RAB3D, member RAS oncogene family
RAB40B	RAB40B, member RAS oncogene family
RAB4B	RAB4B, member RAS oncogene family
RAB5B	RAB5B, member RAS oncogene family
RAB6B	RAB6B, member RAS oncogene family
RAB8B	RAB8B, member RAS oncogene family
RABGAP1L	RAB GTPase activating protein 1-like
RABL5	RAB, member RAS oncogene family-like 5
RALGPS1	Ral GEF with PH domain and SH3 binding motif 1
RASSF2	Ras association (RalGDS/AF-6) domain family 2
RBKS	ribokinase
RBM4	RNA binding motif protein 4
RBMS3	RNA binding motif, single stranded interacting protein
REEP1	receptor accessory protein 1
RELL1
RET	ret proto-oncogene (multiple endocrine neoplasia and medullary thyroid carcinoma 1, Hirschsprung disease)
RFTN1	raftlin, lipid raft linker 1
RFX2	regulatory factor X, 2 (influences HLA class II expression)
RFX3	regulatory factor X, 3 (influences HLA class II expression)
RG9MTD2	RNA (guanine-9-) methyltransferase domain containing 2
RGL2	ral guanine nucleotide dissociation stimulator-like 2
RGS13	regulator of G-protein signalling 13
RGS3	regulator of G-protein signalling 3
RHBDF1	rhomboid 5 homolog 1 (Drosophila)
RHCE	Rh blood group, CcEe antigens
RHD	Rh blood group, D antigen
RHOC	ras homolog gene family, member C
RIBC1	RIB43A domain with coiled-coils 1
RICTOR	-
RIT1	Ras-like without CAAX 1
RNASEL	ribonuclease L (2',5'-oligoisoadenylate synthetase-dependent)
RNASET2	ribonuclease T2
RND2	Rho family GTPase 2
RNF103	ring finger protein 103
RNF123	ring finger protein 123
RNF149	ring finger protein 149
RNF150	ring finger protein 150
RNF165	ring finger protein 165
RNF213
RNF41	ring finger protein 41
ROBO2	roundabout, axon guidance receptor, homolog 2 (Drosophila)
ROPN1L	ropporin 1-like
RORA	RAR-related orphan receptor A
RPS6KA2	ribosomal protein S6 kinase, 90kDa, polypeptide 2
RPS6KA6	ribosomal protein S6 kinase, 90kDa, polypeptide 6
RPS6KL1	ribosomal protein S6 kinase-like 1
RRM2B	ribonucleotide reductase M2 B (TP53 inducible)
RSPH1
RSPH3
RSPH4A
RSPH9
RTN2	reticulon 2
RUFY2	RUN and FYVE domain containing 2
RUFY3	RUN and FYVE domain containing 3
RUNDC3A
RWDD2A
S100A13	S100 calcium binding protein A13
SAMD15
SAMD8	sterile alpha motif domain containing 8
SAMSN1	SAM domain, SH3 domain and nuclear localisation signals, 1
SARS2	seryl-tRNA synthetase 2
SATB1	special AT-rich sequence binding protein 1 (binds to nuclear matrix/scaffold-associating DNA's)
SBF1	SET binding factor 1
SBK1	SH3-binding domain kinase 1
SCARB2	scavenger receptor class B, member 2
SCG5	secretogranin V (7B2 protein)
SCN3A	sodium channel, voltage-gated, type III, alpha
SCN3B	sodium channel, voltage-gated, type III, beta
SCN9A	sodium channel, voltage-gated, type IX, alpha
SCRN3	secernin 3
SDCCAG8	serologically defined colon cancer antigen 8
SDSL	serine dehydratase-like
SEC23B	Sec23 homolog B (S. cerevisiae)
SECISBP2L
SEPSECS
SERINC3	serine incorporator 3
SEZ6L2	seizure related 6 homolog (mouse)-like 2
SFXN3	sideroflexin 3
SGSH	N-sulfoglucosamine sulfohydrolase (sulfamidase)
SGSM1
SGSM2
SH2D3C	SH2 domain containing 3C
SH3BP5	SH3-domain binding protein 5 (BTK-associated)
SH3RF1	SH3 domain containing ring finger 1
SHANK3	SH3 and multiple ankyrin repeat domains 3
SHC1	SHC (Src homology 2 domain containing) transforming protein 1
SHC3	SHC (Src homology 2 domain containing) transforming protein 3
SHC4	SHC (Src homology 2 domain containing) family, member 4
SIAE	sialic acid acetylesterase
SIK1
SIRT3	sirtuin (silent mating type information regulation 2 homolog) 3 (S. cerevisiae)
SIRT5	sirtuin (silent mating type information regulation 2 homolog) 5 (S. cerevisiae)
SLC12A7	solute carrier family 12 (potassium/chloride transporters), member 7
SLC22A4	solute carrier family 22 (organic cation transporter), member 4
SLC23A2	solute carrier family 23 (nucleobase transporters), member 2
SLC25A16	solute carrier family 25 (mitochondrial carrier; Graves disease autoantigen), member 16
SLC26A11	solute carrier family 26, member 11
SLC2A11	solute carrier family 2 (facilitated glucose transporter), member 11
SLC35C2	solute carrier family 35, member C2
SLC35D2	solute carrier family 35, member D2
SLC39A6	solute carrier family 39 (zinc transporter), member 6
SLC41A2	solute carrier family 41, member 2
SLC44A5	solute carrier family 44, member 5
SMAD9	SMAD, mothers against DPP homolog 9 (Drosophila)
SMARCD3	SWI/SNF related, matrix associated, actin dependent regulator of chromatin, subfamily d, member 3
SMURF2	SMAD specific E3 ubiquitin protein ligase 2
SNORA68	small nucleolar RNA, H/ACA box 68
SNX16	sorting nexin 16
SNX21	sorting nexin family member 21
SOCS2	suppressor of cytokine signaling 2
SOHLH2	spermatogenesis and oogenesis specific basic helix-loop-helix 2
SOS1	son of sevenless homolog 1 (Drosophila)
SPA17	sperm autoantigenic protein 17
SPAG16	sperm associated antigen 16
SPAG6	sperm associated antigen 6
SPAG9	sperm associated antigen 9
SPATA17	spermatogenesis associated 17
SPATA2L
SPATA4	spermatogenesis associated 4
SPATA7	spermatogenesis associated 7
SPEF1
SPEF2
SPG11	spastic paraplegia 11 (autosomal recessive)
SPG7	spastic paraplegia 7, paraplegin (pure and complicated autosomal recessive)
SPIRE2	spire homolog 2 (Drosophila)
SPSB1	splA/ryanodine receptor domain and SOCS box containing 1
SPTAN1	spectrin, alpha, non-erythrocytic 1 (alpha-fodrin)
SQSTM1	sequestosome 1
SRCIN1
SRGAP3	SLIT-ROBO Rho GTPase activating protein 3
SRRM3
SSBP3	single stranded DNA binding protein 3
SSH1	slingshot homolog 1 (Drosophila)
SSTR2	somatostatin receptor 2
ST6GAL2	ST6 beta-galactosamide alpha-2,6-sialyltranferase 2
ST8SIA4	ST8 alpha-N-acetyl-neuraminide alpha-2,8-sialyltransferase 4
STAG3L4
STAM2	signal transducing adaptor molecule (SH3 domain and ITAM motif) 2
STARD10	START domain containing 10
STAT2	signal transducer and activator of transcription 2, 113kDa
STAT3	signal transducer and activator of transcription 3 (acute-phase response factor)
STK10	serine/threonine kinase 10
STK36	serine/threonine kinase 36 (fused homolog, Drosophila)
STMN4	stathmin-like 4
STS	steroid sulfatase (microsomal), arylsulfatase C, isozyme S
STX12	syntaxin 12
STX4	syntaxin 4
STXBP1	syntaxin binding protein 1
STXBP5	syntaxin binding protein 5 (tomosyn)
STYX	serine/threonine/tyrosine interacting protein
SULT4A1	sulfotransferase family 4A, member 1
SUMF1	sulfatase modifying factor 1
SUSD1	sushi domain containing 1
SUV420H1	suppressor of variegation 4-20 homolog 1 (Drosophila)
SYBU
SYNGR3	synaptogyrin 3
SYNRG
SYT11	synaptotagmin XI
TACC2	transforming, acidic coiled-coil containing protein 2
TADA3
TAF13	TAF13 RNA polymerase II, TATA box binding protein (TBP)-associated factor, 18kDa
TAGLN3	transgelin 3
TAOK3	TAO kinase 3
TBC1D16	TBC1 domain family, member 16
TBC1D19	TBC1 domain family, member 19
TBC1D9	TBC1 domain family, member 9 (with GRAM domain)
TCEAL7	transcription elongation factor A (SII)-like 7
TCTN1
TCTN2
TDRD7	tudor domain containing 7
TECPR1
TECPR2
TERF2IP	telomeric repeat binding factor 2, interacting protein
TEX9	testis expressed sequence 9
THAP2	THAP domain containing, apoptosis associated protein 2
THBS3	thrombospondin 3
THNSL1	threonine synthase-like 1 (bacterial)
THOC5	THO complex 5
TIMP2	TIMP metallopeptidase inhibitor 2
TM7SF2	transmembrane 7 superfamily member 2
TMED4	transmembrane emp24 protein transport domain containing 4
TMEM132A	transmembrane protein 132A
TMEM134	transmembrane protein 134
TMEM150C
TMEM151A
TMEM187
TMEM231
TMEM232
TMEM27	transmembrane protein 27
TMEM30A	transmembrane protein 30A
TMEM38A	transmembrane protein 38A
TMEM42	transmembrane protein 42
TMEM53	transmembrane protein 53
TMEM67	transmembrane protein 67
TMEM87B	transmembrane protein 87B
TMEM91	transmembrane protein 91
TMEM9B	TMEM9 domain family, member B
TMOD1	tropomodulin 1
TMTC2	transmembrane and tetratricopeptide repeat containing 2
TMTC4	transmembrane and tetratricopeptide repeat containing 4
TNFRSF12A	tumor necrosis factor receptor superfamily, member 12A
TNFRSF19	tumor necrosis factor receptor superfamily, member 19
TNFSF4	tumor necrosis factor (ligand) superfamily, member 4 (tax-transcriptionally activated glycoprotein 1, 34kDa)
TNKS2	tankyrase, TRF1-interacting ankyrin-related ADP-ribose polymerase 2
TOLLIP	toll interacting protein
TOMM40L	translocase of outer mitochondrial membrane 40 homolog-like (yeast)
TP53BP1	tumor protein p53 binding protein, 1
TP53INP1	tumor protein p53 inducible nuclear protein 1
TPCN2	two pore segment channel 2
TPM3	tropomyosin 3
TPM4	tropomyosin 4
TPPP3
TPRG1L
TRAF3IP1	TNF receptor-associated factor 3 interacting protein 1
TRAF3IP2	TRAF3 interacting protein 2
TRAK1	trafficking protein, kinesin binding 1
TRAK2	trafficking protein, kinesin binding 2
TRIM36	tripartite motif-containing 36
TRIM46	tripartite motif-containing 46
TRIP11	thyroid hormone receptor interactor 11
TRPM8	transient receptor potential cation channel, subfamily M, member 8
TRPT1	tRNA phosphotransferase 1
TSC1	tuberous sclerosis 1
TSC22D3	TSC22 domain family, member 3
TSHZ2	teashirt family zinc finger 2
TSNAXIP1	translin-associated factor X interacting protein 1
TSPAN31	tetraspanin 31
TSPAN7	tetraspanin 7
TTC12	tetratricopeptide repeat domain 12
TTC23	tetratricopeptide repeat domain 23
TTC25	tetratricopeptide repeat domain 25
TTC30A	tetratricopeptide repeat domain 30A
TTC30B	tetratricopeptide repeat domain 30B
TTC9B	tetratricopeptide repeat domain 9B
TTLL1	tubulin tyrosine ligase-like family, member 1
TTLL11	tubulin tyrosine ligase-like family, member 11
TTPAL
TUBB2A	tubulin, beta 2A
TUBB4	tubulin, beta 4
TUBG2	tubulin, gamma 2
TUBGCP6	tubulin, gamma complex associated protein 6
TUSC2	tumor suppressor candidate 2
TXNRD3	thioredoxin reductase 3
UBE2H	ubiquitin-conjugating enzyme E2H (UBC8 homolog, yeast)
UBE2Q2	ubiquitin-conjugating enzyme E2Q (putative) 2
UBR5
UCKL1	uridine-cytidine kinase 1-like 1
UEVLD	UEV and lactate/malate dehyrogenase domains
UPB1	ureidopropionase, beta
USP21	ubiquitin specific peptidase 21
USP27X	ubiquitin specific peptidase 27, X-linked
USP32	ubiquitin specific peptidase 32
USP35	ubiquitin specific peptidase 35
USP40	ubiquitin specific peptidase 40
USP46	ubiquitin specific peptidase 46
VASH1	vasohibin 1
VASH2	vasohibin 2
VIP	vasoactive intestinal peptide
VLDLR	very low density lipoprotein receptor
VPS33B	vacuolar protein sorting 33B (yeast)
VPS53	vacuolar protein sorting 53 (S. cerevisiae)
VWA5A
WDR19	WD repeat domain 19
WDR20	WD repeat domain 20
WDR25	WD repeat domain 25
WDR31	WD repeat domain 31
WDR44	WD repeat domain 44
WDR45	WD repeat domain 45
WDR47	WD repeat domain 47
WDR5B	WD repeat domain 5B
WDR60	WD repeat domain 60
WDR66	WD repeat domain 66
WDR73	WD repeat domain 73
WDR78	WD repeat domain 78
WDR86	WD repeat domain 86
WIPI1	WD repeat domain, phosphoinositide interacting 1
WSB1	WD repeat and SOCS box-containing 1
XPNPEP1	X-prolyl aminopeptidase (aminopeptidase P) 1, soluble
XPR1	xenotropic and polytropic retrovirus receptor
YIPF6	Yip1 domain family, member 6
YOD1	YOD1 OTU deubiquinating enzyme 1 homolog (S. cerevisiae)
YPEL2	yippee-like 2 (Drosophila)
YPEL3	yippee-like 3 (Drosophila)
YPEL5	yippee-like 5 (Drosophila)
ZBTB4	zinc finger and BTB domain containing 4
ZBTB46	zinc finger and BTB domain containing 46
ZC3H6	zinc finger CCCH-type containing 6
ZER1
ZFP14	zinc finger protein 14 homolog (mouse)
ZFP28	zinc finger protein 28 homolog (mouse)
ZFP37	zinc finger protein 37 homolog (mouse)
ZFP90	zinc finger protein 90 homolog (mouse)
ZKSCAN1	zinc finger with KRAB and SCAN domains 1
ZKSCAN5
ZNF135	zinc finger protein 135
ZNF160	zinc finger protein 160
ZNF165	zinc finger protein 165
ZNF174	zinc finger protein 174
ZNF177	zinc finger protein 177
ZNF19	zinc finger protein 19
ZNF226	zinc finger protein 226
ZNF233	zinc finger protein 233
ZNF25	zinc finger protein 25
ZNF251	zinc finger protein 251
ZNF254	zinc finger protein 254
ZNF264	zinc finger protein 264
ZNF268	zinc finger protein 268
ZNF271	zinc finger protein 271
ZNF276	zinc finger protein 276
ZNF280D
ZNF284	zinc finger protein 284
ZNF320	zinc finger protein 320
ZNF323	zinc finger protein 323
ZNF329	zinc finger protein 329
ZNF34	zinc finger protein 34
ZNF347	zinc finger protein 347
ZNF35	zinc finger protein 35
ZNF354A	zinc finger protein 354A
ZNF404	zinc finger protein 404
ZNF416	zinc finger protein 416
ZNF419
ZNF420	zinc finger protein 420
ZNF44	zinc finger protein 44
ZNF441	zinc finger protein 441
ZNF446	zinc finger protein 446
ZNF500	zinc finger protein 500
ZNF514	zinc finger protein 514
ZNF529	zinc finger protein 529
ZNF540	zinc finger protein 540
ZNF556	zinc finger protein 556
ZNF557	zinc finger protein 557
ZNF558	zinc finger protein 558
ZNF568	zinc finger protein 568
ZNF583	zinc finger protein 583
ZNF584	zinc finger protein 584
ZNF585A	zinc finger protein 585A
ZNF585B	zinc finger protein 585B
ZNF587	zinc finger protein 587
ZNF596	zinc finger protein 596
ZNF599	zinc finger protein 599
ZNF605	zinc finger protein 605
ZNF606	zinc finger protein 606
ZNF610	zinc finger protein 610
ZNF616	zinc finger protein 616
ZNF621	zinc finger protein 621
ZNF626	zinc finger protein 626
ZNF627	zinc finger protein 627
ZNF641	zinc finger protein 641
ZNF652	zinc finger protein 652
ZNF677	zinc finger protein 677
ZNF688	zinc finger protein 688
ZNF697	zinc finger protein 697
ZNF703	zinc finger protein 703
ZNF713	zinc finger protein 713
ZNF720	zinc finger protein 720
ZNF75D
ZNF763	zinc finger protein 763
ZNF776	zinc finger protein 776
ZNF792	zinc finger protein 792
ZNF84	zinc finger protein 84
ZNF846
ZNF853
ZNF862
ZNF880
ZNF91	zinc finger protein 91
ZSCAN18
ZXDC	ZXD family zinc finger C
