# Supplementary material for: Remarkable Synergy When Combining EZH2 Inhibitors with YM155 Is H3K27me3-Independent
Source: Cancers (Basel). 2022 Dec 29;15(1):208. doi: 10.3390/cancers15010208 (PMC9818370; doi:10.3390/cancers15010208)
Supplement: Supplementary file 1 [file cancers-15-00208-s001.zip › Table S2. Common genes by miR34s.xlsx]

## Sheet: Commonly down by miR34s
ADAMTS2
ADI1
AK2
AK4
ANGPTL2
ANLN
ANXA5
AOX1
AP2S1
APPL1
ARAP2
ARGLU1
ARHGAP1
ARHGAP11A
ARHGAP42
ARHGAP6
ARL4A
ARL6IP6
AS3MT
ASCL1
ASF1B
ASPM
ATAD2
ATAD5
ATPAF1
ATPIF1
AURKA
AURKB
B3GALTL
B4GALT1
BARD1
BCL2L12
BIRC5
BLM
BMP7
BRCA1
BRCA2
BRIP1
BUB1
BUB1B
C10ORF78
C10ORF84
C11ORF82
C12ORF32
C13ORF34
C14ORF106
C15ORF42
C16ORF5
C16ORF75
C1ORF112
C1ORF135
C1ORF61
C20ORF72
C21ORF58
C3ORF58
C4ORF21
C5ORF34
C9ORF100
CABLES2
CALCB
CALML4
CASC5
CASP8AP2
CBLN1
CBX5
CCBL1
CCDC3
CCDC50
CCNA2
CCNB1
CCNB2
CCNE2
CCNF
CCNG1
CDC20
CDC23
CDC25A
CDC25C
CDC45
CDC6
CDC7
CDCA2
CDCA3
CDCA5
CDCA7
CDCA7L
CDCA8
CDH11
CDK1
CDK2
CDK4
CDKN3
CDT1
CENPA
CENPE
CENPF
CENPH
CENPI
CENPK
CENPL
CENPM
CENPN
CENPO
CENPW
CEP152
CEP55
CHAF1A
CHAF1B
CHEK1
CHEK2
CHRAC1
CKAP2L
CLSPN
CNPY3
CNTNAP2
CRIP2
CTSC
CTSL2
CXCL12
CXCR7
CYB5B
DCLRE1A
DDX11
DEPDC1
DEPDC1B
DGCR14
DHFR
DHRS13
DHX37
DIAPH1
DIAPH3
DLEU1
DLEU2
DLGAP5
DNA2
DNAJC10
DONSON
DPF1
DSCC1
DSN1
DTL
DTYMK
DUT
E2F1
E2F2
E2F7
E2F8
ECT2
EED
ELAVL1
EMP2
EPR1
ERCC1
ERCC6L
ERI1
ERLIN1
ESCO2
ESPL1
ETS1
EXO1
EZH2
FAM111B
FAM122B
FAM126A
FAM54A
FAM64A
FAM69A
FAM83D
FANCA
FANCC
FANCD2
FANCE
FANCG
FANCI
FBLN1
FBXO5
FEN1
FHL2
FKBP1A
FLJ45482
FOXJ2
FOXM1
FUS
FUT4
FUT9
G2E3
GABRQ
GAS1
GAS2L3
GAS5
GFRA3
GINS1
GINS2
GINS3
GINS4
GLT8D1
GMNN
GNAS-AS
GNPDA1
GPC6
GPR107
GPSM2
GRIK3
GRN
GSG2
GTF3C2
GTSE1
GXYLT1
H2AFX
HACE1
HADH
HAUS1
HAUS4
HCN3
HDAC1
HECTD2
HELLS
HES1
HGF
HJURP
HMGN4
HMGN5
HMMR
HN1
HOOK1
HP1BP3
HPDL
HRASLS
HSD17B6
HSPA2
IL2RB
ING3
IQGAP3
IRX3
ITGB3BP
KANK2
KCNQ5
KIAA0101
KIAA1274
KIAA1524
KIF11
KIF14
KIF15
KIF18A
KIF18B
KIF20A
KIF23
KIF2C
KIF4A
KIFC1
KLF15
KNTC1
LAPTM4B
LDHA
LEF1
LIG1
LIX1
LMAN2L
LMO3
LOC100127983
LOC100128191
LOC100288693
LOC100506638
LOC100506761
LOC283481
LOC346887
LOC641518
LOC644538
LSM2
MAD2L1
MAD2L2
MAPK1IP1L
MASTL
MATR3
MCM10
MCM2
MCM3
MCM4
MCM5
MCM6
MELK
MIR17HG
MKI67
MLF1IP
MMD
MND1
MPHOSPH6
MRPS12
MSH6
MST4
MTUS2
MXD3
MYBL1
MYBL2
MYO19
NAA50
NASP
NCAPD2
NCAPD3
NCAPG
NCAPG2
NCAPH
NDC80
NDE1
NEDD4
NEIL3
NEK2
NEXN
NOL10
NPTX2
NRGN
NRM
NRN1
NRP2
NUF2
NUP210
NUP98
NUPL1
NUSAP1
NXPH2
OAF
OAS1
OIP5
ORC1
PABPC4L
PASK
PBK
PDLIM1
PHF19
PHGDH
PIF1
PKMYT1
PLBD1
PLIN2
PLK1
PLK4
PLOD2
PLS1
PLSCR1
POC1A
POLA2
POLD1
POLD3
POLE
POLE2
POLQ
PPP1R11
PPP2R2B
PRC1
PRIM1
PRIMA1
PRR11
PSMC3IP
PSRC1
PTTG1
PTTG3P
RAB31
RAB3C
RAB7L1
RAD51
RAD51AP1
RAD51L3
RAD54B
RAD54L
RBBP4
RBL1
RBM15
RBPMS
RBPMS2
RDM1
RFC2
RFC4
RFC5
RFXAP
RIBC2
RNASEH2A
RNASEH2B
RNASEH2C
RPIA
RPL39L
RPS28
RRAS2
RRM1
RRM2
SAC3D1
SCARA3
SDC1
SDC2
SGOL1
SGOL2
SGPP1
SH3GL1
SHCBP1
SHMT1
SHMT2
SIVA1
SKA1
SKA3
SKP2
SLC18A1
SLC29A1
SLC2A1
SLC30A6
SLC39A8
SLC44A1
SLC8A1
SLCO4A1
SLIT2
SMC2
SMC4
SMTNL2
SNAI2
SNCA
SNHG7
SNRNP25
SNX12
SOAT1
SOX2
SPAG5
SPARC
SPC24
SPC25
SPG20
SPOCK3
SRGAP2
SST
STIL
SURF4
SVIP
SWAP70
SYNCRIP
TACC1
TACC3
TAF3
TCF19
TEX15
TIFA
TIMELESS
TK1
TM7SF3
TMED4
TMEM109
TMEM133
TMEM200A
TMEM201
TMEM45A
TMEM48
TMEM70
TMEM97
TMEM98
TMPO
TMSB15A
TMTC3
TNFAIP8
TNNT2
TOP2A
TPD52
TPX2
TRAM2
TRIM14
TRIM29
TROAP
TSEN15
TTK
TTLL4
TYMS
UBE2C
UBE2L3
UBE2T
UGGT2
UNG
USP1
VCL
VPS4A
VTI1B
WDHD1
WDR76
WDYHV1
WEE1
WHSC1
XRCC6BP1
YKT6
ZAK
ZNF367
ZNF395
ZWINT

## Sheet: Commonly up by miR34s
MARCH2
MARCH4
SEPT8
MARCH9
ADAM22
AGTPBP1
AKD1
AKT3
ANGPT2
ANK1
ANKRD44
ANKRD46
AP2A2
APOL2
ARFGAP2
ARHGAP18
ARID3B
ARL4C
ARL8A
ARRDC4
ATP1A1OS
ATP5F1
ATP9A
ATRN
B3GALT2
B3GNTL1
BBS12
BBS2
BCR
BDNF
BEND5
BICD1
BIK
BRWD1
BSDC1
C10ORF125
C10ORF32
C11ORF70
C12ORF68
C12ORF76
C14ORF159
C14ORF179
C14ORF39
C15ORF17
C15ORF57
C16ORF68
C17ORF97
C19ORF12
C19ORF20
C19ORF30
C1ORF114
C20ORF12
C20ORF194
C4ORF34
C5ORF41
C6ORF154
C6ORF165
C6ORF168
C6ORF170
C6ORF70
C7
C8ORF42
C9ORF150
C9ORF9
CACNA1B
CACNA2D3
CADPS
CAMK1D
CAP2
CBY1
CCDC113
CCDC151
CCDC78
CCDC96
CCNG2
CD44
CDC37L1
CDK10
CDK5R1
CDRT4
CELF3
CELF4
CHGB
CHKB
CHODL
CHP
CLIP3
CLUAP1
CMPK1
CNGB1
COL5A2
COL6A1
COPG2
COPZ1
CPEB3
CSRNP3
CTSO
CUL4B
CXORF23
CYB5D2
CYLD
CYTH2
DALRD3
DCAF10
DCAF5
DCLK1
DCLK2
DDAH1
DENND5B
DFNA5
DGKB
DLGAP4
DLX5
DNAH5
DNAJB5
DNAJC27
DNAJC4
DNALI1
DNM3
DOCK4
DOCK7
DPCD
DUSP1
DUSP18
DUSP6
DYNC2H1
DYNC2LI1
DYX1C1
DZIP3
EBF1
EFHC1
EHD1
EIF2C2
EME2
ENPP2
ENSA
ENTPD3
EPHA5
ERCC2
ERLIN2
EXOC7
FAM116B
FAM149B1
FAM18B1
FAM89A
FBLIM1
FBXO16
FBXO28
FGD4
FGF14
FGF20
FHOD3
FIG4
FLCN
FLJ22536
FLJ35390
FLNB
FNBP1
FSD1L
FUCA1
FZD3
FZD5
GAA
GAB2
GARNL3
GDI1
GDPD1
GFOD2
GLS
GNG2
GNG3
GOLGA1
GOLGA2
GOLGB1
GPC2
GPR137C
GPR155
GRAMD1B
GRK4
GRK5
GUCA1A
HCFC2
HEXDC
HINT3
HIPK3
HIST1H2AC
HIST1H2AK
HIST1H2BC
HIST1H2BG
HIST1H3E
HIST1H4H
HS6ST3
ICAM2
IDS
IFI16
IFT27
IFT88
IL17RD
IMPACT
INTU
IP6K2
IQCE
IRF9
IRS2
ITGA1
IVD
JAK1
JAKMIP2
JAKMIP3
KCNJ2
KCNMB4
KCNQ2
KCTD13
KCTD21
KDM4A
KDM5B
KDM6B
KIAA0232
KIAA0408
KIAA0513
KIAA0895L
KIAA0913
KIAA1370
KIAA1377
KIAA1549
KIAA1841
KIF1B
KIF3A
KIF3B
KIF5A
KIF5C
KLF9
KLHL24
KLHL28
KLRAQ1
KPNA5
LANCL1
LCA5
LCOR
LETM2
LIN7B
LMF1
LMO2
LMO4
LOC100009676
LOC100287331
LOC100288152
LOC100288617
LOC100505490
LOC100506019
LOC100506295
LOC100506728
LOC100506979
LOC100507039
LOC100507110
LOC100507291
LOC100507297
LOC100508307
LOC147670
LOC284440
LOC375190
LOC401233
LOC440104
LOC441617
LOC641467
LOC642852
LOC647979
LOC728190
LOC728485
LONP2
LRRC16A
LRRC23
LRRC27
LRRC4
LRRFIP1
LRRTM2
LTK
MAFB
MAML2
MAP1B
MAP1LC3B
MAP3K12
MAP3K13
MAP6
MAPK10
MAPK8
MBNL2
MCF2L
MDH1B
METRNL
MFSD10
MFSD6
MGEA5
MIAT
MKRN1
MPG
MREG
MT1F
MT1X
MUM1
MXD1
MXD4
MYL5
MYT1
MYT1L
NACAD
NAPB
NAT1
NBAS
NBEA
NCOA3
NCRNA00094
NCRNA00247
NDRG4
NDUFS1
NECAB3
NEDD4L
NELF
NHLRC3
NLK
NME3
NME5
NMNAT2
NPHP3
NRBP1
NT5E
NTRK1
ODF2L
OGT
OPTN
OSCP1
OSTM1
OTUD5
PAK3
PALMD
PCDHB10
PCDHB14
PCDHB15
PCDHB18
PCDHB6
PCDHB7
PCMTD1
PCNXL2
PDE10A
PEX19
PGAM2
PIH1D2
PIK3IP1
PIK3R1
PIK3R3
PISD
PKIB
PKIG
PLCXD2
PLCXD3
PLD5
PLEKHA3
PLK2
PLTP
PNRC1
POLD4
POLR3GL
POMT1
PPFIBP2
PPIL6
PPP1R9A
PPP2R5B
PRAF2
PREPL
PRKCH
PRKCZ
PRLHR
PRMT2
PRUNE2
PTPRB
PTPRF
PTPRH
PTPRN2
PWWP2B
QDPR
RAB11FIP4
RAB39B
RAB3D
RAB40B
RAB4B
RAB6B
RBKS
RBMS3
RGS13
RIBC1
RNASET2
RNF150
RNF165
RNF213
RNF41
ROBO2
RORA
RPS6KA2
RPS6KA6
RSPH1
RSPH3
RTN2
RUFY3
RUNDC3A
SAMSN1
SATB1
SBK1
SCG5
SCN3B
SDSL
SECISBP2L
SEPSECS
SERINC3
SEZ6L2
SGSH
SH2D3C
SH3BP5
SH3RF1
SHANK3
SHC1
SHC3
SIAE
SIK1
SLC22A4
SLC25A16
SLC26A11
SLC35D2
SLC39A6
SLC44A5
SMARCD3
SMURF2
SNX21
SOCS2
SPAG16
SPATA17
SPATA2L
SPATA7
SPEF2
SPTAN1
SRGAP3
SSH1
ST6GAL2
ST8SIA4
STAM2
STK10
STMN4
STS
STX12
STX4
STXBP5
STYX
SYBU
SYNGR3
SYT11
TAGLN3
TBC1D19
TBC1D9
TCTN1
TECPR2
THBS3
TM7SF2
TMEM132A
TMEM150C
TMEM187
TMEM38A
TMEM87B
TMOD1
TOLLIP
TP53INP1
TPRG1L
TRIM46
TRPM8
TSC22D3
TSHZ2
TSPAN31
TTC12
TTC25
TTC30A
TTC30B
TTLL1
TUBB4
TUBG2
UBE2H
UBE2Q2
UCKL1
VLDLR
VPS33B
WDR31
WDR45
WDR47
WDR78
WDR86
XPR1
YPEL2
YPEL3
YPEL5
ZBTB4
ZFP14
ZFP90
ZKSCAN1
ZNF177
ZNF226
ZNF233
ZNF25
ZNF264
ZNF280D
ZNF329
ZNF404
ZNF420
ZNF44
ZNF441
ZNF514
ZNF529
ZNF540
ZNF556
ZNF558
ZNF606
ZNF610
ZNF626
ZNF641
ZNF652
ZNF677
ZNF688
ZNF703
ZNF713
ZNF720
ZNF792
ZNF84
ZNF846
ZNF862
ZNF880
ZSCAN18
