# Supplementary material for: Remarkable Synergy When Combining EZH2 Inhibitors with YM155 Is H3K27me3-Independent
Source: Cancers (Basel). 2022 Dec 29;15(1):208. doi: 10.3390/cancers15010208 (PMC9818370; doi:10.3390/cancers15010208)
Supplement: Supplementary file 1 [file cancers-15-00208-s001.zip › Table S3.27 Gene annotation .xlsx]

## Sheet: Sheet1
Category	Term	Count	%	P value
GOTERM_BP_FAT	neuroblast proliferation	2	0.6	0.03
GOTERM_BP_FAT	DNA replication	4	1.3	0.0056
GOTERM_BP_FAT	cell division	14	4.5	1.5e-15
GOTERM_BP_FAT	mitosis	16	5.2	5.9e-21
GOTERM_BP_FAT	nuclear division	16	5.2	5.9e-21
GOTERM_BP_FAT	M phase of mitotic cell cycle	16	5.2	7.8e-21
GOTERM_BP_FAT	organelle fission	16	5.2	1.1e-20
GOTERM_BP_FAT	M phase	18	5.8	6.1e-22
GOTERM_BP_FAT	mitotic cell cycle	19	6.2	6.2e-23
GOTERM_BP_FAT	cell cycle phase	19	6.2	4.7e-22
GOTERM_BP_FAT	cell cycle process	20	6.5	2.3e-21
GOTERM_BP_FAT	cell cycle	22	7.1	3.3e-22
GOTERM_CC_FAT	spindle	15	4.9	2.8e-22
GOTERM_CC_FAT	microtubule cytoskeleton	17	5.5	2e-17
GOTERM_CC_FAT	cytoskeletal part	17	5.5	1.2e-13
GOTERM_CC_FAT	cytoskeleton	17	5.5	3.7e-11
GOTERM_CC_FAT	intracellular non-membrane-bounded organelle	19	6.2	3.8e-09
GOTERM_CC_FAT	non-membrane-bounded organelle	19	6.2	3.8e-09
GOTERM_MF_FAT	DNA binding	8	2.6	0.084
SP_PIR_KEYWORDS	dna replication	3	1	0.0063
SP_PIR_KEYWORDS	Apoptosis	3	1	0.093
SP_PIR_KEYWORDS	acetylation	8	2.6	0.056
SP_PIR_KEYWORDS	mitosis	13	4.2	3.3e-18
SP_PIR_KEYWORDS	cell division	15	4.9	4.9e-20
SP_PIR_KEYWORDS	cytoplasm	17	5.5	5.8e-07
SP_PIR_KEYWORDS	cell cycle	19	6.2	6.4e-24
SP_PIR_KEYWORDS	nucleus	20	6.5	4.9e-08
SP_PIR_KEYWORDS	polymorphism	25	8.1	0.00028
SP_PIR_KEYWORDS	phosphoprotein	27	8.8	9.8e-12
UP_SEQ_FEATURE	mutagenesis site	13	4.2	5e-06
UP_SEQ_FEATURE	sequence variant	25	8.1	0.00071
